# Supplementary material
Source: Research Square preprint supplement (doi:10.21203/rs.3.rs-9762487/v1)
Supplement: Supplementary file 1 [file 72d32b1f2a7d02a1ac7f7dce.docx]

**Supplementary Material List**

Additional file 1: Fig. S1. Distribution of *Aedes albopictus.*

Additional file 2: Fig. S2. Ten land use and land cover categories.

Additional file 3: Summary statistics of covariates used in the analysis (non-standardized variables), representing land-use and land-cover percentages, climate, and IBP according to census tracts. Table S1 Descriptive statistics for the 20 m buffer. Table S2 Descriptive statistics for the 30 m buffer. Table S3 Descriptive statistics for the 100 m buffer.

Additional file 4: Univariable regression models for female *Aedes aegypti* mosquitoes. Table S4 Regression models for the 20 m buffer. Table S5 Regression models for the 30 m buffer. Table S6 Regression models for the 50 m buffer. Table S7 Regression models for the 100 m buffer.

Additional file 5: Regression models for female *Aedes aegypti* mosquitoes including covariates with 95% credible intervals excluding zero in the univariable analysis. Table S8 Regression models for the 20 m buffer. Table S9 Regression models for the 30 m buffer. Table S10 Regression models for the 50 m buffer. Table S11 Regression models for the 100 m buffer.

Additional file 6: Univariable regression models for total *Aedes aegypti* mosquitoes. Table S12 Regression models for the 20 m buffer. Table S13 Regression models for the 30 m buffer. Table S14 Regression models for the 50 m buffer. Table S15 Regression models for the 100 m buffer.

Additional file 7: Regression models for total *Aedes aegypti* mosquitoes including covariates with 95% credible intervals excluding zero in the univariable analysis. Table S16 Regression models for the 20 m buffer. Table S17 Regression models for the 30 m buffer. Table S18 Regression models for the 50 m buffer. Table S19 Regression models for the 100 m buffer.

Additional file 8: Univariable regression models for *Culex* spp. mosquitoes. Table S20 Regression models for the 20 m buffer. Table S21 Regression models for the 30 m buffer. Table S22 Regression models for the 50 m buffer. Table S23 Regression models for the 100 m buffer.

Additional file 9: Regression models for *Culex* spp. mosquitoes including covariates with 95% credible intervals excluding zero in the univariable analysis. Table S24 Regression models for the 20 m buffer. Table S25 Regression models for the 30 m buffer. Table S26 Regression models for the 50 m buffer. Table S27 Regression models for the 100 m buffer.
