# Supplementary material
Source: Research Square preprint supplement (doi:10.21203/rs.3.rs-9762487/v1)
Supplement: Supplementary file 1 [file 148c116a90f1e36f1d1b8ebf.xlsx]

## Sheet: Read Me
Read me
Each worksheet is labeled according to the buffer radius used. Within each worksheet, regression models are identified by the covariates included. Models are further characterized by the buffer radius used for spatial aggregation of covariates (20, 30, 50, and 100 m).
The prefix “PC_” indicates that the covariate represents the percentage of a given land-use and land-cover class within the buffer. The prefix “sqrt_PC” indicates square-root of the percentage of each variable. Land-use and land-cover classes were maintained as coded categories to facilitate data organization.
Variables:
IBP_num — IBP index
humidity — relative humidity (%)
precipitation — precipitation (mm)
temperature — temperature (°C)
sqrt_humid — square-root transformation of humidity
sqrt_precip — square-root transformation of precipitation
sqrt_temp — square-root transformation of temperature
Land-use and land-cover variables:
PC1 / sqrt_PC1 — Cement
PC2 / sqrt_PC2 — Tree
PC3 / sqrt_PC3 — Asbestos tile
PC4 / sqrt_PC4 — Swimming pool
PC5 / sqrt_PC5 — Exposed soil
PC6 / sqrt_PC6 — Grass
PC7 / sqrt_PC7 — Asphalt
PC8 / sqrt_PC8 — Zinc tile
PC9 / sqrt_PC9 — Shade
PC10 / sqrt_PC10 — Ceramic tile
Each worksheet contains regression model summaries with the following columns:
Model: Identifier of the fitted model, indicating the spatial buffer used, the response variable, and the set of covariates included.
Intercept: Posterior mean estimate of the intercept (expected value of the dependent variable when all covariates are equal to zero), along with the 95% credible interval.
Covariates (e.g., sqrt_, IBP_num, etc.): Posterior mean estimates of the coefficients for the independent variables, with their respective 95% credible intervals. These represent the direction (positive/negative) and magnitude of the association with the dependent variable.
Range: Posterior mean and 95% credible interval of the spatial range parameter (SPDE), indicating the approximate distance beyond which spatial autocorrelation becomes negligible.
Stdev: Posterior mean and 95% credible interval of the spatial standard deviation parameter (SPDE), representing the magnitude of residual spatial variability captured by the latent Gaussian field. Higher values indicate stronger spatial heterogeneity not explained by the covariates.
DIC (Deviance Information Criterion): Measure of model fit that accounts for model complexity. Lower values indicate a better balance between goodness of fit and parsimony.
WAIC (Watanabe–Akaike Information Criterion): Fully Bayesian criterion for model comparison, with emphasis on predictive performance. Lower values indicate better predictive accuracy.
LPML (Log Pseudo Marginal Likelihood): Measure of overall predictive performance based on CPO. Higher values indicate better predictive ability.
CPO (Conditional Predictive Ordinate, median): Summary of pointwise predictive performance based on leave-one-out cross-validation. Higher values indicate better predictive performance.
cpo_failures: Number of observations for which the CPO could not be reliably estimated (missing or unstable values), potentially indicating model fit issues or numerical instability.
cpo_failure_rate: Proportion of observations with CPO failures. Lower values indicate greater model stability and more reliable predictive inference.
correlation: Pearson correlation between observed and predicted values at the sampled locations. Values closer to 1 indicate better agreement between observed and predicted values.
MAE (Mean Absolute Error): Average absolute difference between observed and predicted values, representing the typical magnitude of prediction errors. Lower values indicate better predictive accuracy.
RMSE (Root Mean Squared Error): Square root of the average squared differences between observed and predicted values. It gives greater weight to large errors, making it sensitive to extreme deviations. Lower values indicate better model performance.
MAE_rel (Relative Mean Absolute Error): The MAE normalized by the mean of the observed values, representing the average prediction error relative to the magnitude of the response variable. It can be interpreted as the typical percentage error. Lower values indicate better predictive accuracy.
RMSE_rel (Relative Root Mean Squared Error): The RMSE normalized by the mean of the observed values, representing the typical prediction error with greater emphasis on large deviations, relative to the magnitude of the response variable. Lower values indicate better model performance.
min_pred: Minimum predicted value over the spatial prediction grid, indicating the lowest estimated intensity of the response variable.
max_pred: Maximum predicted value over the spatial prediction grid, indicating the highest estimated intensity of the response variable.
CV_mean (Coefficient of Variation, mean): Mean coefficient of variation across the prediction grid, representing the average relative uncertainty of the model predictions. Lower values indicate more stable predictions.
CV_q25_q50_q75 (Coefficient of Variation quartiles): First quartile (Q25), median (Q50), and third quartile (Q75) of the coefficient of variation across the prediction grid, summarizing the distribution of relative uncertainty.
CV_high_prop (Proportion of high uncertainty): Proportion of grid cells with coefficient of variation greater than 0.7, representing the spatial extent of high prediction uncertainty. Lower values indicate a more reliable prediction surface.
Time: Total model execution time (in seconds).
non_zero_CrI: Indicator of whether the 95% credible intervals for all coefficients (including the intercept) exclude zero.
"yes": none of the intervals include zero
"no": at least one interval includes zero
model_family: Probability distribution assumed for the response variable (e.g., Poisson or negative binomial).
DIC, WAIC, LPML and CPO-based metrics are computed using the observed data and evaluate overall model fit and predictive performance based on the sampled locations.
Correlation, MAE, RMSE, MAE_rel and RMSE_rel are calculated by comparing observed and predicted values at the sampled locations, providing measures of prediction accuracy.
The coefficient of variation (CV) was calculated as the ratio between the posterior standard deviation and posterior mean prediction for each grid cell.
Spatial prediction summaries (min_pred, max_pred, and CV metrics) were computed using predictions over the continuous spatial prediction grid generated from the fitted SPDE models, representing the range of predicted values and associated uncertainty at unsampled locations.

## Sheet: Table_S16_aedestotal_20m
Model	Intercept	IBP_num	sqrt_PC2	sqrt_PC7	Range	Stdev	DIC	WAIC	LPML	CPO_median	cpo_failures	cpo_failure_rate	correlation	MAE	RMSE	MAE_rel	RMSE_rel	min_pred	max_pred	CV_mean	CV_q25_q50_q75	CV_high_prop	Time	non_zero_CrI	model_family
model_20m_agy_	1.641_x000D_ (1.514–1.763)	-	-	-	112.31_x000D_ (41.648–221.494)	1.562_x000D_ (0.796–3.034)	1063.72	1046.59	-2748.59	8.73946e-07	29.7911	0.148955	0.99641	1.15737	1.4202	0.177103	0.217321	1.80922	26.0586	0.571064	0.455 / 0.516 / 0.604	0.130489	58.8369	yes	nbinomial
model_20m_agy_IBP_num	1.995_x000D_ (1.713–2.271)	0.169_x000D_ (0.046–0.292)	-	-	96.269_x000D_ (37.83–196.715)	1.72_x000D_ (0.81–3.336)	1056.53	1048.11	-2456.08	2.14853e-05	13.3285	0.0666424	0.993579	1.21044	1.50498	0.185224	0.230296	1.91201	26.3011	0.559679	0.438 / 0.498 / 0.585	0.117186	49.6007	yes	nbinomial
model_20m_agy_sqrt_PC2	1.643_x000D_ (1.515–1.765)	-	0.136_x000D_ (0.021–0.252)	-	119.736_x000D_ (43.158–247.548)	1.471_x000D_ (0.718–2.877)	1064.47	1049.53	-2722.39	1.01522e-06	28.393	0.141965	0.994631	1.21269	1.50409	0.185568	0.23016	1.79885	22.3272	0.562012	0.453 / 0.512 / 0.596	0.120681	50.7916	yes	nbinomial
model_20m_agy_sqrt_PC7	1.643_x000D_ (1.516–1.765)	-	-	-0.135_x000D_ (-0.252–-0.019)	111.465_x000D_ (41.79–229.197)	1.556_x000D_ (0.751–3.025)	1060.39	1047.49	-2682.86	1.60911e-06	27.9976	0.139988	0.99522	1.19431	1.47227	0.182756	0.22529	1.66144	26.5986	0.566824	0.452 / 0.512 / 0.598	0.124119	53.1656	yes	nbinomial
model_20m_agy_IBP_num_sqrt_PC2	2.019_x000D_ (1.74–2.293)	0.18_x000D_ (0.058–0.301)	0.144_x000D_ (0.031–0.256)	-	101.926_x000D_ (37.846–228.615)	1.666_x000D_ (0.704–3.311)	1064.93	1050.58	-2595.25	4.31318e-06	24.3385	0.121692	0.990662	1.25483	1.57922	0.192016	0.241656	1.91023	33.5592	0.547616	0.43 / 0.487 / 0.57	0.105406	47.293	yes	nbinomial
model_20m_agy_IBP_num_sqrt_PC7	1.992_x000D_ (1.711–2.266)	0.167_x000D_ (0.045–0.289)	-	-0.132_x000D_ (-0.246–-0.018)	98.301_x000D_ (36.319–221.953)	1.738_x000D_ (0.726–3.477)	1057.56	1046.92	-2472.13	1.44384e-05	17.8324	0.089162	0.99239	1.2145	1.50588	0.185846	0.230433	1.75382	32.0032	0.557952	0.436 / 0.495 / 0.58	0.113297	73.2518	yes	nbinomial
model_20m_agy_IBP_num_sqrt_PC2_sqrt_PC7	2.007_x000D_ (1.728–2.28)	0.175_x000D_ (0.053–0.296)	0.114_x000D_ (-0.004–0.233)	-0.096_x000D_ (-0.215–0.023)	99.661_x000D_ (35.365–210.706)	1.682_x000D_ (0.763–3.437)	1061.9	1047.96	-2568.29	6.0861e-06	25.4715	0.127357	0.990838	1.23191	1.53356	0.18851	0.234668	1.82891	31.8049	0.549221	0.435 / 0.492 / 0.575	0.105969	59.0411	no	nbinomial

## Sheet: Table_S17_aedestotal_30m
Model	Intercept	IBP_num	sqrt_PC2	sqrt_PC7	Range	Stdev	DIC	WAIC	LPML	CPO_median	cpo_failures	cpo_failure_rate	correlation	MAE	RMSE	MAE_rel	RMSE_rel	min_pred	max_pred	CV_mean	CV_q25_q50_q75	CV_high_prop	Time	non_zero_CrI	model_family
model_30m_agy_	1.644_x000D_ (1.517–1.766)	-	-	-	114.12_x000D_ (43.054–244.533)	1.571_x000D_ (0.728–3.04)	1065.36	1048.87	-2696.26	1.27795e-06	27.2072	0.136036	0.996312	1.19472	1.47887	0.182819	0.226301	1.78525	25.6852	0.570004	0.451 / 0.512 / 0.6	0.128403	60.0802	yes	nbinomial
model_30m_agy_IBP_num	1.994_x000D_ (1.713–2.27)	0.169_x000D_ (0.046–0.292)	-	-	96.136_x000D_ (37.394–194.098)	1.72_x000D_ (0.822–3.358)	1055.36	1047.25	-2425.63	2.87571e-05	11.9109	0.0595543	0.993654	1.20193	1.49177	0.183922	0.228274	1.91233	26.3725	0.559566	0.438 / 0.498 / 0.585	0.117581	55.1659	yes	nbinomial
model_30m_agy_sqrt_PC2	1.638_x000D_ (1.514–1.758)	-	0.173_x000D_ (0.058–0.288)	-	114.978_x000D_ (44.972–222.541)	1.478_x000D_ (0.775–2.776)	1056.3	1041.2	-2608.6	7.61605e-06	30.9031	0.154515	0.994093	1.13963	1.38528	0.174389	0.211978	2.34368	89.2964	0.643913	0.496 / 0.585 / 0.722	0.278507	81.0367	yes	nbinomial
model_30m_agy_sqrt_PC7	1.642_x000D_ (1.519–1.762)	-	-	-0.17_x000D_ (-0.286–-0.055)	107.488_x000D_ (41.691–224.711)	1.597_x000D_ (0.743–3.079)	1053.91	1041.26	-2549.65	1.08033e-05	26.2894	0.131447	0.994285	1.14645	1.38966	0.175433	0.212649	0.710615	18.9585	0.63286	0.503 / 0.579 / 0.675	0.205851	56.0534	yes	nbinomial
model_30m_agy_IBP_num_sqrt_PC2	2.001_x000D_ (1.723–2.273)	0.173_x000D_ (0.052–0.294)	0.175_x000D_ (0.062–0.288)	-	97.309_x000D_ (35.697–196.169)	1.674_x000D_ (0.805–3.365)	1055.07	1044.73	-2360.64	3.68408e-05	15.0353	0.0751763	0.990663	1.21921	1.51658	0.186566	0.232071	2.41299	127.115	0.626438	0.477 / 0.563 / 0.698	0.247224	54.0345	yes	nbinomial
model_30m_agy_IBP_num_sqrt_PC7	1.966_x000D_ (1.686–2.24)	0.153_x000D_ (0.031–0.275)	-	-0.156_x000D_ (-0.271–-0.042)	92.538_x000D_ (33.395–183.161)	1.754_x000D_ (0.854–3.573)	1058.92	1048.51	-2536.95	6.28039e-06	17.2291	0.0861456	0.991575	1.24997	1.55172	0.191273	0.237448	0.864613	22.5412	0.613736	0.487 / 0.56 / 0.652	0.171975	53.6051	yes	nbinomial
model_30m_agy_IBP_num_sqrt_PC2_sqrt_PC7	1.979_x000D_ (1.702–2.251)	0.162_x000D_ (0.041–0.283)	0.133_x000D_ (0.009–0.257)	-0.099_x000D_ (-0.224–0.025)	96.153_x000D_ (36.374–197.713)	1.698_x000D_ (0.797–3.355)	1054.11	1041.82	-2398.47	2.85751e-05	21.5647	0.107823	0.99064	1.19467	1.46368	0.182811	0.223976	1.47337	96.2859	0.764602	0.609 / 0.719 / 0.848	0.543881	49.1524	no	nbinomial

## Sheet: Table_S18_aedestotal_50m
Model	Intercept	IBP_num	sqrt_PC1	sqrt_PC2	sqrt_PC5	sqrt_PC7	Range	Stdev	DIC	WAIC	LPML	CPO_median	cpo_failures	cpo_failure_rate	correlation	MAE	RMSE	MAE_rel	RMSE_rel	min_pred	max_pred	CV_mean	CV_q25_q50_q75	CV_high_prop	Time	non_zero_CrI	model_family
model_50m_agy_	1.649_x000D_ (1.517–1.777)	-	-	-	-	-	111.671_x000D_ (41.738–230.121)	1.575_x000D_ (0.759–3.069)	1060.9	1049.72	-2624.03	2.98835e-06	19.7937	0.0989687	0.996464	1.18226	1.45899	0.180912	0.223258	1.78495	25.8013	0.574094	0.456 / 0.518 / 0.607	0.133927	59.8371	yes	nbinomial
model_50m_agy_IBP_num	1.999_x000D_ (1.716–2.275)	0.169_x000D_ (0.047–0.292)	-	-	-	-	96.174_x000D_ (36.589–198.698)	1.723_x000D_ (0.802–3.419)	1060.94	1051.94	-2552.17	8.74132e-06	13.6366	0.0681828	0.993214	1.25859	1.57788	0.192592	0.241451	1.94682	25.9601	0.553051	0.433 / 0.492 / 0.578	0.111211	44.9053	yes	nbinomial
model_50m_agy_sqrt_PC1	1.647_x000D_ (1.522–1.768)	-	0.145_x000D_ (0.029–0.262)	-	-	-	106.826_x000D_ (40.928–225.311)	1.613_x000D_ (0.744–3.131)	1056.03	1044.55	-2531.24	1.23649e-05	19.4229	0.0971144	0.99518	1.15353	1.45283	0.176516	0.222315	2.69471	32.4728	0.588724	0.465 / 0.53 / 0.619	0.142833	42.7695	yes	nbinomial
model_50m_agy_sqrt_PC2	1.644_x000D_ (1.517–1.766)	-	-	0.136_x000D_ (0.021–0.252)	-	-	109.832_x000D_ (41.519–223.955)	1.577_x000D_ (0.767–3.06)	1062.74	1048.41	-2714.59	1.37801e-06	27.8196	0.139098	0.994989	1.219	1.50573	0.186535	0.23041	2.4666	63.0026	0.651321	0.505 / 0.59 / 0.717	0.275238	51.7949	yes	nbinomial
model_50m_agy_sqrt_PC5	1.639_x000D_ (1.515–1.759)	-	-	-	-0.166_x000D_ (-0.283–-0.048)	-	105.915_x000D_ (38.718–218.166)	1.624_x000D_ (0.77–3.233)	1055.45	1042.71	-2549.47	1.51271e-05	22.7316	0.113658	0.994663	1.15393	1.42086	0.176577	0.217424	0.988338	21.5598	0.598722	0.473 / 0.541 / 0.638	0.162279	52.7045	yes	nbinomial
model_50m_agy_sqrt_PC7	1.648_x000D_ (1.519–1.771)	-	-	-	-	-0.119_x000D_ (-0.237–-0.001)	107.73_x000D_ (39.176–241.373)	1.647_x000D_ (0.702–3.293)	1063.23	1052.62	-2709.31	1.0892e-06	18.3216	0.0916082	0.994896	1.24703	1.54122	0.190823	0.235841	1.05543	21.1451	0.642041	0.513 / 0.585 / 0.677	0.20726	39.1891	yes	nbinomial
model_50m_agy_IBP_num_sqrt_PC1	1.982_x000D_ (1.702–2.256)	0.16_x000D_ (0.038–0.282)	0.135_x000D_ (0.021–0.25)	-	-	-	92.153_x000D_ (33.019–184.956)	1.793_x000D_ (0.856–3.684)	1060.06	1046.58	-2569.25	6.43629e-06	26.5967	0.132983	0.992487	1.20226	1.52981	0.183973	0.234094	2.57663	42.0352	0.571151	0.448 / 0.511 / 0.596	0.123217	57.5644	yes	nbinomial
model_50m_agy_IBP_num_sqrt_PC2	1.999_x000D_ (1.72–2.272)	0.171_x000D_ (0.049–0.293)	-	0.136_x000D_ (0.023–0.249)	-	-	95.551_x000D_ (39.082–202.192)	1.716_x000D_ (0.775–3.248)	1056.82	1045.93	-2458.05	2.08441e-05	17.3849	0.0869243	0.991861	1.21489	1.51043	0.185906	0.231129	2.58988	96.2849	0.64028	0.489 / 0.573 / 0.698	0.247055	61.9959	yes	nbinomial
model_50m_agy_IBP_num_sqrt_PC5	1.893_x000D_ (1.595–2.185)	0.122_x000D_ (-0.01–0.252)	-	-	-0.123_x000D_ (-0.248–0.001)	-	97.45_x000D_ (37.521–194.642)	1.709_x000D_ (0.832–3.339)	1060.27	1044.2	-2597.07	5.92256e-06	28.381	0.141905	0.993191	1.17191	1.44717	0.179328	0.22145	1.16463	24.0064	0.5947	0.466 / 0.534 / 0.631	0.155515	55.1324	no	nbinomial
model_50m_agy_IBP_num_sqrt_PC7	1.984_x000D_ (1.701–2.259)	0.161_x000D_ (0.038–0.283)	-	-	-	-0.107_x000D_ (-0.223–0.009)	92.952_x000D_ (35.068–188.864)	1.767_x000D_ (0.834–3.536)	1061.87	1053.06	-2585.2	4.58697e-06	12.5538	0.0627688	0.991843	1.28571	1.60053	0.196742	0.244917	1.22099	24.6377	0.621118	0.496 / 0.565 / 0.653	0.172144	47.5859	no	nbinomial
model_50m_agy_IBP_num_sqrt_PC1_sqrt_PC2	1.981_x000D_ (1.707–2.251)	0.161_x000D_ (0.041–0.281)	0.157_x000D_ (0.043–0.271)	0.156_x000D_ (0.044–0.269)	-	-	89.112_x000D_ (35.114–175.675)	1.782_x000D_ (0.866–3.482)	1050.95	1039.2	-2403.14	2.95059e-05	20.9728	0.104864	0.99106	1.16108	1.47079	0.17767	0.225063	4.33087	183.772	0.656453	0.509 / 0.595 / 0.712	0.269207	74.602	yes	nbinomial
model_50m_agy_IBP_num_sqrt_PC1_sqrt_PC5	1.882_x000D_ (1.585–2.172)	0.108_x000D_ (-0.022–0.238)	0.147_x000D_ (0.033–0.261)	-	-0.137_x000D_ (-0.261–-0.014)	-	94.829_x000D_ (37.197–197.407)	1.742_x000D_ (0.797–3.498)	1059.37	1052.79	-2636.69	9.39667e-07	14.6545	0.0732727	0.989647	1.31785	1.72191	0.20166	0.26349	1.50084	32.4394	0.58587	0.46 / 0.528 / 0.619	0.14148	54.2132	no	nbinomial
model_50m_agy_IBP_num_sqrt_PC1_sqrt_PC7	1.97_x000D_ (1.69–2.244)	0.154_x000D_ (0.032–0.276)	0.123_x000D_ (0.008–0.238)	-	-	-0.09_x000D_ (-0.206–0.026)	89.387_x000D_ (32.634–179.462)	1.828_x000D_ (0.868–3.731)	1057.8	1046.37	-2523.61	1.04837e-05	21.4384	0.107192	0.99171	1.20173	1.51913	0.183891	0.232461	1.69039	35.3493	0.652516	0.521 / 0.598 / 0.69	0.229638	52.2223	no	nbinomial
model_50m_agy_IBP_num_sqrt_PC2_sqrt_PC5	1.913_x000D_ (1.616–2.204)	0.13_x000D_ (0–0.261)	-	0.123_x000D_ (0.01–0.237)	-0.104_x000D_ (-0.23–0.02)	-	95.24_x000D_ (37.153–199.398)	1.717_x000D_ (0.786–3.348)	1055.98	1044.64	-2444.48	2.69149e-05	18.6542	0.0932709	0.991563	1.20405	1.50204	0.184247	0.229846	1.71408	77.8414	0.684591	0.531 / 0.626 / 0.751	0.33882	85.1678	no	nbinomial
model_50m_agy_IBP_num_sqrt_PC2_sqrt_PC7	1.992_x000D_ (1.712–2.267)	0.167_x000D_ (0.044–0.289)	-	0.111_x000D_ (-0.019–0.242)	-	-0.051_x000D_ (-0.184–0.082)	94.722_x000D_ (36.679–205.224)	1.762_x000D_ (0.769–3.45)	1062.34	1049	-2608.9	3.91578e-06	24.975	0.124875	0.991356	1.24453	1.54603	0.190441	0.236577	2.10037	86.787	0.820736	0.665 / 0.768 / 0.89	0.66817	81.5607	no	nbinomial
model_50m_agy_IBP_num_sqrt_PC5_sqrt_PC7	1.875_x000D_ (1.577–2.167)	0.113_x000D_ (-0.019–0.244)	-	-	-0.124_x000D_ (-0.248–0)	-0.108_x000D_ (-0.223–0.007)	94.607_x000D_ (35.873–194.049)	1.75_x000D_ (0.819–3.466)	1054.38	1041.99	-2479.37	2.28863e-05	23.585	0.117925	0.992245	1.16433	1.42407	0.178168	0.217915	0.761058	23.8723	0.664366	0.532 / 0.61 / 0.704	0.25799	73.425	no	nbinomial
model_50m_agy_IBP_num_sqrt_PC1_sqrt_PC2_sqrt_PC5	1.884_x000D_ (1.592–2.17)	0.115_x000D_ (-0.014–0.243)	0.165_x000D_ (0.052–0.279)	0.143_x000D_ (0.031–0.255)	-0.118_x000D_ (-0.242–0.005)	-	90.451_x000D_ (33.503–191.879)	1.805_x000D_ (0.8–3.65)	1049.54	1035.38	-2454.57	2.17499e-05	31.3349	0.156675	0.991082	1.11885	1.41294	0.171208	0.216212	2.16573	134.164	0.696938	0.546 / 0.64 / 0.756	0.357195	75.641	no	nbinomial
model_50m_agy_IBP_num_sqrt_PC1_sqrt_PC2_sqrt_PC7	1.982_x000D_ (1.705–2.254)	0.16_x000D_ (0.039–0.281)	0.155_x000D_ (0.038–0.273)	0.152_x000D_ (0.02–0.285)	-	-0.008_x000D_ (-0.143–0.127)	90.53_x000D_ (33.968–192.555)	1.812_x000D_ (0.804–3.634)	1055.79	1042.6	-2506.3	1.28236e-05	26.2828	0.131414	0.990671	1.18547	1.51038	0.181403	0.231122	4.40691	202.374	0.877414	0.722 / 0.834 / 0.954	0.792007	82.0063	no	nbinomial
model_50m_agy_IBP_num_sqrt_PC1_sqrt_PC5_sqrt_PC7	1.857_x000D_ (1.561–2.147)	0.101_x000D_ (-0.03–0.231)	0.135_x000D_ (0.02–0.25)	-	-0.137_x000D_ (-0.261–-0.014)	-0.089_x000D_ (-0.204–0.026)	90.934_x000D_ (33.695–191.592)	1.798_x000D_ (0.807–3.631)	1051.7	1040.67	-2361.3	3.57913e-05	17.0367	0.0851833	0.991303	1.16729	1.46052	0.178622	0.223492	1.00041	27.7094	0.682896	0.548 / 0.631 / 0.726	0.303985	68.372	no	nbinomial
model_50m_agy_IBP_num_sqrt_PC2_sqrt_PC5_sqrt_PC7	1.899_x000D_ (1.598–2.192)	0.123_x000D_ (-0.009–0.255)	-	0.093_x000D_ (-0.038–0.225)	-0.11_x000D_ (-0.236–0.016)	-0.061_x000D_ (-0.194–0.072)	94.278_x000D_ (36.005–193.103)	1.736_x000D_ (0.813–3.429)	1057.2	1046.42	-2524.37	1.6916e-05	18.239	0.0911948	0.991267	1.21756	1.51279	0.186314	0.231491	1.30804	61.5188	0.874997	0.723 / 0.834 / 0.953	0.791669	78.0762	no	nbinomial
model_50m_agy_IBP_num_sqrt_PC1_sqrt_PC2_sqrt_PC5_sqrt_PC7	1.881_x000D_ (1.585–2.171)	0.113_x000D_ (-0.017–0.243)	0.162_x000D_ (0.044–0.28)	0.134_x000D_ (0.001–0.268)	-0.119_x000D_ (-0.244–0.005)	-0.017_x000D_ (-0.153–0.118)	90.972_x000D_ (32.448–196.093)	1.814_x000D_ (0.79–3.744)	1050.15	1038.89	-2357.59	3.42545e-05	17.3049	0.0865246	0.990616	1.15023	1.46511	0.176011	0.224194	2.11876	134.103	0.927143	0.774 / 0.89 / 1.007	0.86038	57.6279	no	nbinomial

## Sheet: Table_S19_aedestotal_100m
Model	Intercept	IBP_num	sqrt_PC1	sqrt_PC3	sqrt_PC5	sqrt_PC10	Range	Stdev	DIC	WAIC	LPML	CPO_median	cpo_failures	cpo_failure_rate	correlation	MAE	RMSE	MAE_rel	RMSE_rel	min_pred	max_pred	CV_mean	CV_q25_q50_q75	CV_high_prop	Time	non_zero_CrI	model_family
model_100m_agy_	1.647_x000D_ (1.518–1.77)	-	-	-	-	-	112.562_x000D_ (42.388–235.774)	1.572_x000D_ (0.741–3.081)	1063.2	1053.5	-2726.64	7.75353e-07	14.6915	0.0734576	0.99638	1.24445	1.56009	0.190429	0.238728	1.79963	25.2403	0.567165	0.45 / 0.511 / 0.598	0.126148	57.9543	yes	nbinomial
model_100m_agy_IBP_num	1.996_x000D_ (1.713–2.273)	0.169_x000D_ (0.046–0.293)	-	-	-	-	96.688_x000D_ (35.494–203.648)	1.75_x000D_ (0.792–3.527)	1060.75	1049.69	-2558.33	1.03852e-05	18.7695	0.0938475	0.993485	1.2228	1.52358	0.187115	0.233141	1.91704	26.1981	0.561095	0.438 / 0.498 / 0.585	0.117919	44.6319	yes	nbinomial
model_100m_agy_sqrt_PC1	1.646_x000D_ (1.52–1.767)	-	0.145_x000D_ (0.028–0.263)	-	-	-	112.078_x000D_ (42.811–234.95)	1.549_x000D_ (0.726–2.996)	1059.01	1045.98	-2612.78	5.00732e-06	25.5639	0.127819	0.995017	1.16569	1.46969	0.178377	0.224896	2.78779	34.4474	0.586169	0.468 / 0.531 / 0.618	0.138718	53.2636	yes	nbinomial
model_100m_agy_sqrt_PC3	1.642_x000D_ (1.518–1.761)	-	-	0.155_x000D_ (0.036–0.275)	-	-	100.4_x000D_ (41.195–195.537)	1.647_x000D_ (0.831–3.093)	1055.47	1044.81	-2447.53	2.69964e-05	15.6604	0.078302	0.994427	1.17654	1.43511	0.180036	0.219604	3.68504	50.5441	0.616798	0.49 / 0.561 / 0.651	0.174229	66.8073	yes	nbinomial
model_100m_agy_sqrt_PC5	1.638_x000D_ (1.514–1.757)	-	-	-	-0.143_x000D_ (-0.262–-0.025)	-	114.116_x000D_ (44.665–224.586)	1.546_x000D_ (0.778–2.96)	1052.52	1040.05	-2492.31	1.01392e-05	6.00478	0.0300239	0.995147	1.11979	1.37737	0.171352	0.210768	1.26015	18.5163	0.604307	0.48 / 0.547 / 0.64	0.164703	46.6356	yes	nbinomial
model_100m_agy_sqrt_PC10	1.65_x000D_ (1.524–1.77)	-	-	-	-	-0.153_x000D_ (-0.269–-0.036)	105.571_x000D_ (38.124–221.287)	1.637_x000D_ (0.757–3.298)	1066.49	1049.65	-2662.93	1.56106e-06	26.2973	0.131486	0.994226	1.20311	1.49661	0.184103	0.229015	1.05728	19.0056	0.585959	0.465 / 0.53 / 0.616	0.136576	55.2865	yes	nbinomial
model_100m_agy_IBP_num_sqrt_PC1	1.975_x000D_ (1.696–2.25)	0.159_x000D_ (0.037–0.281)	0.134_x000D_ (0.018–0.249)	-	-	-	97.08_x000D_ (36.551–199.13)	1.706_x000D_ (0.801–3.382)	1055.84	1044.5	-2424.9	2.44463e-05	18.2487	0.0912436	0.992711	1.17212	1.4812	0.179361	0.226657	2.8319	36.5681	0.57488	0.454 / 0.516 / 0.601	0.125247	54.8637	yes	nbinomial
model_100m_agy_IBP_num_sqrt_PC3	1.893_x000D_ (1.579–2.203)	0.12_x000D_ (-0.02–0.26)	-	0.1_x000D_ (-0.035–0.235)	-	-	95.486_x000D_ (37.778–201.544)	1.745_x000D_ (0.79–3.367)	1061.26	1048.67	-2577.49	5.96275e-06	25.7923	0.128962	0.992961	1.2151	1.5043	0.185937	0.230191	3.03748	44.0916	0.633506	0.498 / 0.573 / 0.67	0.199594	67.4344	no	nbinomial
model_100m_agy_IBP_num_sqrt_PC5	1.923_x000D_ (1.624–2.216)	0.133_x000D_ (0.002–0.264)	-	-	-0.098_x000D_ (-0.224–0.027)	-	95.807_x000D_ (36.626–196.022)	1.747_x000D_ (0.827–3.456)	1063.64	1051.74	-2649.5	2.71609e-06	21.8601	0.109301	0.992748	1.25765	1.58489	0.192448	0.242523	1.5113	24.4414	0.592574	0.466 / 0.532 / 0.623	0.146271	42.1937	no	nbinomial
model_100m_agy_IBP_num_sqrt_PC10	1.901_x000D_ (1.588–2.209)	0.12_x000D_ (-0.02–0.259)	-	-	-	-0.099_x000D_ (-0.23–0.033)	97.752_x000D_ (36.671–208.994)	1.715_x000D_ (0.765–3.425)	1063.95	1055.93	-2639.42	2.38235e-06	12.4356	0.0621782	0.991948	1.30607	1.66389	0.199858	0.254613	1.3949	23.0795	0.582131	0.46 / 0.525 / 0.61	0.13032	60.2669	no	nbinomial
model_100m_agy_IBP_num_sqrt_PC1_sqrt_PC3	1.856_x000D_ (1.544–2.164)	0.101_x000D_ (-0.038–0.24)	0.143_x000D_ (0.027–0.258)	0.115_x000D_ (-0.019–0.25)	-	-	94.966_x000D_ (36.06–197.405)	1.733_x000D_ (0.798–3.427)	1056.56	1044.94	-2443.9	2.29458e-05	20.5191	0.102595	0.992028	1.18934	1.49062	0.181995	0.228098	4.56571	63.1772	0.649939	0.517 / 0.596 / 0.692	0.235725	48.3618	no	nbinomial
model_100m_agy_IBP_num_sqrt_PC1_sqrt_PC5	1.893_x000D_ (1.597–2.183)	0.118_x000D_ (-0.012–0.248)	0.141_x000D_ (0.026–0.257)	-	-0.11_x000D_ (-0.234–0.014)	-	94.937_x000D_ (34.959–204.121)	1.762_x000D_ (0.774–3.557)	1058.76	1044.97	-2549.44	8.69943e-06	27.1409	0.135704	0.991916	1.18868	1.51617	0.181894	0.232007	1.96647	32.5431	0.608911	0.48 / 0.548 / 0.638	0.159912	54.87	no	nbinomial
model_100m_agy_IBP_num_sqrt_PC1_sqrt_PC10	1.908_x000D_ (1.597–2.213)	0.126_x000D_ (-0.013–0.265)	0.12_x000D_ (0–0.239)	-	-	-0.067_x000D_ (-0.202–0.069)	98.618_x000D_ (37.815–204.475)	1.687_x000D_ (0.784–3.303)	1054.86	1043.82	-2379.11	3.69003e-05	14.2971	0.0714856	0.992623	1.15373	1.45482	0.176547	0.222619	2.21868	29.5073	0.629732	0.501 / 0.573 / 0.665	0.190632	62.2017	no	nbinomial
model_100m_agy_IBP_num_sqrt_PC3_sqrt_PC5	1.851_x000D_ (1.53–2.167)	0.101_x000D_ (-0.042–0.244)	-	0.077_x000D_ (-0.063–0.217)	-0.079_x000D_ (-0.21–0.05)	-	94.769_x000D_ (36.442–193.033)	1.758_x000D_ (0.832–3.45)	1057.14	1045.28	-2486.09	1.88526e-05	20.5111	0.102555	0.9932	1.17364	1.44886	0.179593	0.221708	2.22594	30.5599	0.703913	0.567 / 0.653 / 0.751	0.36565	53.2062	no	nbinomial
model_100m_agy_IBP_num_sqrt_PC3_sqrt_PC10	1.812_x000D_ (1.478–2.141)	0.082_x000D_ (-0.069–0.232)	-	0.088_x000D_ (-0.048–0.224)	-	-0.087_x000D_ (-0.22–0.046)	96.153_x000D_ (39.952–189.18)	1.691_x000D_ (0.839–3.164)	1054.5	1044.71	-2336.83	3.50057e-05	9.80449	0.0490225	0.992978	1.16794	1.4378	0.178721	0.220015	2.14222	30.3333	0.680774	0.543 / 0.632 / 0.729	0.315935	51.9591	no	nbinomial
model_100m_agy_IBP_num_sqrt_PC5_sqrt_PC10	1.842_x000D_ (1.522–2.157)	0.096_x000D_ (-0.048–0.239)	-	-	-0.084_x000D_ (-0.211–0.042)	-0.083_x000D_ (-0.216–0.05)	95.648_x000D_ (38.007–192.521)	1.721_x000D_ (0.824–3.325)	1057.01	1044.61	-2541.23	1.31799e-05	25.6934	0.128467	0.992994	1.16499	1.44382	0.178269	0.220936	1.20347	23.4394	0.626096	0.496 / 0.567 / 0.66	0.184206	50.0917	no	nbinomial
model_100m_agy_IBP_num_sqrt_PC1_sqrt_PC3_sqrt_PC5	1.818_x000D_ (1.5–2.131)	0.081_x000D_ (-0.061–0.223)	0.147_x000D_ (0.032–0.262)	0.091_x000D_ (-0.048–0.229)	-0.088_x000D_ (-0.216–0.04)	-	94.621_x000D_ (38.404–193.446)	1.714_x000D_ (0.813–3.265)	1060.56	1047.23	-2557.83	7.14796e-06	25.3605	0.126802	0.991206	1.22405	1.55277	0.187307	0.237609	3.03255	45.6159	0.70533	0.573 / 0.659 / 0.755	0.379235	73.9982	no	nbinomial
model_100m_agy_IBP_num_sqrt_PC1_sqrt_PC3_sqrt_PC10	1.816_x000D_ (1.484–2.143)	0.081_x000D_ (-0.069–0.23)	0.132_x000D_ (0.013–0.251)	0.107_x000D_ (-0.029–0.243)	-	-0.049_x000D_ (-0.185–0.087)	96.199_x000D_ (35.062–198.2)	1.732_x000D_ (0.807–3.501)	1063.96	1047.64	-2568.93	5.65775e-06	25.1835	0.125918	0.991828	1.19784	1.50298	0.183295	0.22999	3.96207	53.1386	0.717228	0.575 / 0.675 / 0.777	0.436165	77.0443	no	nbinomial
model_100m_agy_IBP_num_sqrt_PC1_sqrt_PC5_sqrt_PC10	1.851_x000D_ (1.532–2.165)	0.099_x000D_ (-0.044–0.242)	0.131_x000D_ (0.012–0.252)	-	-0.102_x000D_ (-0.229–0.025)	-0.044_x000D_ (-0.182–0.093)	95.92_x000D_ (35.9–200.769)	1.733_x000D_ (0.791–3.455)	1055.04	1042.99	-2420.07	3.1087e-05	18.6395	0.0931974	0.992252	1.15175	1.45753	0.176244	0.223034	1.79495	27.8381	0.653348	0.52 / 0.597 / 0.692	0.233527	77.6791	no	nbinomial
model_100m_agy_IBP_num_sqrt_PC3_sqrt_PC5_sqrt_PC10	1.787_x000D_ (1.448–2.12)	0.07_x000D_ (-0.083–0.223)	-	0.07_x000D_ (-0.071–0.21)	-0.068_x000D_ (-0.2–0.062)	-0.077_x000D_ (-0.211–0.057)	96.013_x000D_ (37.66–193.92)	1.731_x000D_ (0.829–3.354)	1056.05	1044.07	-2460.96	2.23023e-05	19.7158	0.098579	0.99302	1.15217	1.41656	0.176307	0.216765	1.82465	24.7588	0.739366	0.599 / 0.695 / 0.796	0.486162	52.1894	no	nbinomial
model_100m_agy_IBP_num_sqrt_PC1_sqrt_PC3_sqrt_PC5_sqrt_PC10	1.8_x000D_ (1.466–2.13)	0.069_x000D_ (-0.082–0.22)	0.138_x000D_ (0.019–0.259)	0.086_x000D_ (-0.054–0.226)	-0.082_x000D_ (-0.213–0.048)	-0.034_x000D_ (-0.172–0.104)	96.674_x000D_ (37.338–222.532)	1.731_x000D_ (0.698–3.384)	1065	1052.29	-2728.56	5.45704e-07	24.8716	0.124358	0.990529	1.25841	1.60939	0.192565	0.246273	2.7814	47.6212	0.763351	0.618 / 0.723 / 0.826	0.559608	63.5413	no	nbinomial
