# Supplementary material
Source: Research Square preprint supplement (doi:10.21203/rs.3.rs-9762487/v1)
Supplement: Supplementary file 2 [file 469af8ef4d7dbfd8cb52069d.xlsx]

## Sheet: Read Me
Read me
Each worksheet is labeled according to the buffer radius used. Within each worksheet, regression models are identified by the covariates included. Models are further characterized by the buffer radius used for spatial aggregation of covariates (20, 30, 50, and 100 m).
The prefix “PC_” indicates that the covariate represents the percentage of a given land-use and land-cover class within the buffer. The prefix “sqrt_PC” indicates square-root of the percentage of each variable. Land-use and land-cover classes were maintained as coded categories to facilitate data organization.
Variables:
IBP_num — IBP index
humidity — relative humidity (%)
precipitation — precipitation (mm)
temperature — temperature (°C)
sqrt_humid — square-root transformation of humidity
sqrt_precip — square-root transformation of precipitation
sqrt_temp — square-root transformation of temperature
Land-use and land-cover variables:
PC1 / sqrt_PC1 — Cement
PC2 / sqrt_PC2 — Tree
PC3 / sqrt_PC3 — Asbestos tile
PC4 / sqrt_PC4 — Swimming pool
PC5 / sqrt_PC5 — Exposed soil
PC6 / sqrt_PC6 — Grass
PC7 / sqrt_PC7 — Asphalt
PC8 / sqrt_PC8 — Zinc tile
PC9 / sqrt_PC9 — Shade
PC10 / sqrt_PC10 — Ceramic tile
Each worksheet contains regression model summaries with the following columns:
Model: Identifier of the fitted model, indicating the spatial buffer used, the response variable, and the set of covariates included.
Intercept: Posterior mean estimate of the intercept (expected value of the dependent variable when all covariates are equal to zero), along with the 95% credible interval.
Covariates (e.g., sqrt_, IBP_num, etc.): Posterior mean estimates of the coefficients for the independent variables, with their respective 95% credible intervals. These represent the direction (positive/negative) and magnitude of the association with the dependent variable.
Range: Posterior mean and 95% credible interval of the spatial range parameter (SPDE), indicating the approximate distance beyond which spatial autocorrelation becomes negligible.
Stdev: Posterior mean and 95% credible interval of the spatial standard deviation parameter (SPDE), representing the magnitude of residual spatial variability captured by the latent Gaussian field. Higher values indicate stronger spatial heterogeneity not explained by the covariates.
DIC (Deviance Information Criterion): Measure of model fit that accounts for model complexity. Lower values indicate a better balance between goodness of fit and parsimony.
WAIC (Watanabe–Akaike Information Criterion): Fully Bayesian criterion for model comparison, with emphasis on predictive performance. Lower values indicate better predictive accuracy.
LPML (Log Pseudo Marginal Likelihood): Measure of overall predictive performance based on CPO. Higher values indicate better predictive ability.
CPO (Conditional Predictive Ordinate, median): Summary of pointwise predictive performance based on leave-one-out cross-validation. Higher values indicate better predictive performance.
cpo_failures: Number of observations for which the CPO could not be reliably estimated (missing or unstable values), potentially indicating model fit issues or numerical instability.
cpo_failure_rate: Proportion of observations with CPO failures. Lower values indicate greater model stability and more reliable predictive inference.
correlation: Pearson correlation between observed and predicted values at the sampled locations. Values closer to 1 indicate better agreement between observed and predicted values.
MAE (Mean Absolute Error): Average absolute difference between observed and predicted values, representing the typical magnitude of prediction errors. Lower values indicate better predictive accuracy.
RMSE (Root Mean Squared Error): Square root of the average squared differences between observed and predicted values. It gives greater weight to large errors, making it sensitive to extreme deviations. Lower values indicate better model performance.
MAE_rel (Relative Mean Absolute Error): The MAE normalized by the mean of the observed values, representing the average prediction error relative to the magnitude of the response variable. It can be interpreted as the typical percentage error. Lower values indicate better predictive accuracy.
RMSE_rel (Relative Root Mean Squared Error): The RMSE normalized by the mean of the observed values, representing the typical prediction error with greater emphasis on large deviations, relative to the magnitude of the response variable. Lower values indicate better model performance.
min_pred: Minimum predicted value over the spatial prediction grid, indicating the lowest estimated intensity of the response variable.
max_pred: Maximum predicted value over the spatial prediction grid, indicating the highest estimated intensity of the response variable.
CV_mean (Coefficient of Variation, mean): Mean coefficient of variation across the prediction grid, representing the average relative uncertainty of the model predictions. Lower values indicate more stable predictions.
CV_q25_q50_q75 (Coefficient of Variation quartiles): First quartile (Q25), median (Q50), and third quartile (Q75) of the coefficient of variation across the prediction grid, summarizing the distribution of relative uncertainty.
CV_high_prop (Proportion of high uncertainty): Proportion of grid cells with coefficient of variation greater than 0.7, representing the spatial extent of high prediction uncertainty. Lower values indicate a more reliable prediction surface.
Time: Total model execution time (in seconds).
non_zero_CrI: Indicator of whether the 95% credible intervals for all coefficients (including the intercept) exclude zero.
"yes": none of the intervals include zero
"no": at least one interval includes zero
model_family: Probability distribution assumed for the response variable (e.g., Poisson or negative binomial).
DIC, WAIC, LPML and CPO-based metrics are computed using the observed data and evaluate overall model fit and predictive performance based on the sampled locations.
Correlation, MAE, RMSE, MAE_rel and RMSE_rel are calculated by comparing observed and predicted values at the sampled locations, providing measures of prediction accuracy.
The coefficient of variation (CV) was calculated as the ratio between the posterior standard deviation and posterior mean prediction for each grid cell.
Spatial prediction summaries (min_pred, max_pred, and CV metrics) were computed using predictions over the continuous spatial prediction grid generated from the fitted SPDE models, representing the range of predicted values and associated uncertainty at unsampled locations.

## Sheet: Table_S12_aedestotal_20m
Model	Intercept	sqrt_humid	sqrt_precip	sqrt_temp	IBP_num	sqrt_PC1	sqrt_PC2	sqrt_PC3	sqrt_PC4	sqrt_PC5	sqrt_PC6	sqrt_PC7	sqrt_PC8	sqrt_PC9	sqrt_PC10	Range	Stdev	DIC	WAIC	LPML	CPO_median	cpo_failures	cpo_failure_rate	correlation	MAE	RMSE	MAE_rel	RMSE_rel	min_pred	max_pred	CV_mean	CV_q25_q50_q75	CV_high_prop	Time	non_zero_CrI	model_family
model_20m_agy_	1.642_x000D_ (1.514–1.765)	-	-	-	-	-	-	-	-	-	-	-	-	-	-	111.696_x000D_ (41.758–229.626)	1.574_x000D_ (0.76–3.061)	1060.86	1048.48	-2659.43	2.31679e-06	23.073	0.115365	0.996428	1.18009	1.45884	0.180579	0.223235	1.78082	25.7514	0.574131	0.456 / 0.517 / 0.606	0.133645	54.4198	yes	nbinomial
model_20m_agy_sqrt_humid	1.642_x000D_ (1.513–1.765)	-0.039_x000D_ (-0.159–0.081)	-	-	-	-	-	-	-	-	-	-	-	-	-	114.359_x000D_ (42.289–240.046)	1.56_x000D_ (0.738–3.045)	1063.56	1049.75	-2742.93	5.93801e-07	29.4484	0.147242	0.996311	1.17216	1.45872	0.179366	0.223217	1.8236	25.963	0.578903	0.46 / 0.522 / 0.611	0.136576	55.7624	no	nbinomial
model_20m_agy_sqrt_precip	1.657_x000D_ (1.529–1.78)	-	-0.1_x000D_ (-0.217–0.017)	-	-	-	-	-	-	-	-	-	-	-	-	113.092_x000D_ (42.214–232.467)	1.541_x000D_ (0.74–3.077)	1069.29	1062.96	-2784.54	2.07335e-07	11.7417	0.0587085	0.994459	1.35284	1.73814	0.207014	0.265973	2.05351	25.4377	0.545691	0.437 / 0.494 / 0.576	0.105631	63.1072	no	nbinomial
model_20m_agy_sqrt_temp	1.644_x000D_ (1.515–1.767)	-	-	0.05_x000D_ (-0.069–0.168)	-	-	-	-	-	-	-	-	-	-	-	113.053_x000D_ (42.082–222.746)	1.544_x000D_ (0.791–2.983)	1064.44	1050.45	-2756.09	6.51832e-07	30.0993	0.150497	0.996031	1.18281	1.46525	0.180996	0.224216	1.89525	26.2985	0.573002	0.459 / 0.52 / 0.606	0.13156	46.002	no	nbinomial
model_20m_agy_IBP_num	1.993_x000D_ (1.713–2.268)	-	-	-	0.169_x000D_ (0.046–0.292)	-	-	-	-	-	-	-	-	-	-	96.43_x000D_ (38.677–190.25)	1.713_x000D_ (0.841–3.289)	1055.67	1045.63	-2432.93	2.6198e-05	14.3691	0.0718457	0.993749	1.18188	1.45968	0.180853	0.223363	1.90245	26.5518	0.560736	0.439 / 0.499 / 0.587	0.11837	72.909	yes	nbinomial
model_20m_agy_sqrt_PC1	1.651_x000D_ (1.524–1.771)	-	-	-	-	0.084_x000D_ (-0.032–0.199)	-	-	-	-	-	-	-	-	-	108.071_x000D_ (40.815–221.925)	1.592_x000D_ (0.767–3.114)	1060.56	1052.71	-2796.96	1.86075e-07	16.8382	0.0841912	0.995887	1.24926	1.59134	0.191164	0.243511	1.97557	24.2414	0.562482	0.447 / 0.507 / 0.593	0.120568	53.3381	no	nbinomial
model_20m_agy_sqrt_PC2	1.641_x000D_ (1.514–1.764)	-	-	-	-	-	0.136_x000D_ (0.02–0.252)	-	-	-	-	-	-	-	-	119.177_x000D_ (43.513–248.983)	1.479_x000D_ (0.709–2.887)	1061.9	1048.01	-2695.08	1.60199e-06	29.1013	0.145507	0.994683	1.19132	1.47343	0.182298	0.225468	1.76647	22.4239	0.566019	0.455 / 0.514 / 0.6	0.124796	66.74	yes	nbinomial
model_20m_agy_sqrt_PC3	1.645_x000D_ (1.515–1.77)	-	-	-	-	-	-	0.043_x000D_ (-0.074–0.16)	-	-	-	-	-	-	-	110.541_x000D_ (41.898–219.763)	1.575_x000D_ (0.792–3.042)	1064.9	1051.43	-2766.52	6.93368e-07	28.5333	0.142667	0.996313	1.20588	1.4893	0.184526	0.227896	1.7912	29.429	0.574156	0.458 / 0.519 / 0.606	0.132405	43.3729	no	nbinomial
model_20m_agy_sqrt_PC4	1.642_x000D_ (1.513–1.765)	-	-	-	-	-	-	-	-0.021_x000D_ (-0.139–0.098)	-	-	-	-	-	-	110.079_x000D_ (41.621–223.427)	1.595_x000D_ (0.778–3.096)	1062.68	1049.23	-2761.2	5.88937e-07	30.1815	0.150907	0.996438	1.17788	1.45427	0.180241	0.222536	1.79163	25.7764	0.579179	0.459 / 0.522 / 0.612	0.13776	48.9767	no	nbinomial
model_20m_agy_sqrt_PC5	1.639_x000D_ (1.512–1.761)	-	-	-	-	-	-	-	-	-0.06_x000D_ (-0.179–0.059)	-	-	-	-	-	109.473_x000D_ (40.869–223.875)	1.61_x000D_ (0.778–3.146)	1059.9	1046.06	-2728.87	1.12227e-06	32.7385	0.163692	0.996352	1.14427	1.40948	0.175099	0.215682	1.78243	27.9383	0.580243	0.461 / 0.523 / 0.611	0.137873	55.8182	no	nbinomial
model_20m_agy_sqrt_PC6	1.646_x000D_ (1.516–1.77)	-	-	-	-	-	-	-	-	-	-0.035_x000D_ (-0.152–0.082)	-	-	-	-	113.279_x000D_ (43.118–229.846)	1.554_x000D_ (0.767–3.007)	1063.94	1053.47	-2735.5	7.09375e-07	17.3249	0.0866245	0.996483	1.2331	1.54121	0.188692	0.235839	1.83803	26.3609	0.572467	0.457 / 0.518 / 0.605	0.131109	59.9792	no	nbinomial
model_20m_agy_sqrt_PC7	1.642_x000D_ (1.516–1.764)	-	-	-	-	-	-	-	-	-	-	-0.135_x000D_ (-0.252–-0.02)	-	-	-	111.512_x000D_ (40.82–231.829)	1.567_x000D_ (0.745–3.088)	1060.55	1046.89	-2672.76	1.77161e-06	29.8115	0.149057	0.995234	1.18743	1.46143	0.181702	0.223631	1.66118	26.6649	0.567383	0.452 / 0.512 / 0.599	0.124627	64.6991	yes	nbinomial
model_20m_agy_sqrt_PC8	1.643_x000D_ (1.513–1.768)	-	-	-	-	-	-	-	-	-	-	-	0.058_x000D_ (-0.058–0.174)	-	-	116.592_x000D_ (43.422–238.668)	1.524_x000D_ (0.75–2.965)	1064.11	1052.87	-2780.47	3.95004e-07	20.7518	0.103759	0.996536	1.23133	1.5425	0.188421	0.236036	1.82492	27.7911	0.571969	0.458 / 0.519 / 0.606	0.129925	60.3116	no	nbinomial
model_20m_agy_sqrt_PC9	1.647_x000D_ (1.52–1.77)	-	-	-	-	-	-	-	-	-	-	-	-	0.067_x000D_ (-0.046–0.181)	-	112.662_x000D_ (42.493–228.73)	1.557_x000D_ (0.763–3.013)	1064.45	1050.56	-2857.79	1.58114e-07	30.2783	0.151392	0.996097	1.18163	1.47779	0.180816	0.226134	2.01111	25.6354	0.57422	0.458 / 0.519 / 0.607	0.133194	55.412	no	nbinomial
model_20m_agy_sqrt_PC10	1.654_x000D_ (1.525–1.777)	-	-	-	-	-	-	-	-	-	-	-	-	-	-0.068_x000D_ (-0.183–0.048)	108.238_x000D_ (39.22–228.898)	1.641_x000D_ (0.756–3.316)	1074.84	1058.9	-2812.63	1.4583e-07	19.9928	0.0999638	0.995713	1.32226	1.67445	0.202335	0.256228	1.70357	24.8806	0.556916	0.442 / 0.501 / 0.586	0.114481	62.2325	no	nbinomial

## Sheet: Table_S13_aedestotal_30m
Model	Intercept	sqrt_humid	sqrt_precip	sqrt_temp	IBP_num	sqrt_PC1	sqrt_PC2	sqrt_PC3	sqrt_PC4	sqrt_PC5	sqrt_PC6	sqrt_PC7	sqrt_PC8	sqrt_PC9	sqrt_PC10	Range	Stdev	DIC	WAIC	LPML	CPO_median	cpo_failures	cpo_failure_rate	correlation	MAE	RMSE	MAE_rel	RMSE_rel	min_pred	max_pred	CV_mean	CV_q25_q50_q75	CV_high_prop	Time	non_zero_CrI	model_family
model_30m_agy_	1.655_x000D_ (1.52–1.782)	-	-	-	-	-	-	-	-	-	-	-	-	-	-	111.625_x000D_ (41.271–228.872)	1.579_x000D_ (0.764–3.092)	1066.7	1052.43	-2764.2	4.93089e-07	28.6973	0.143487	0.996476	1.21246	1.50054	0.185533	0.229615	1.82736	25.676	0.569478	0.453 / 0.513 / 0.601	0.128516	123.729	yes	nbinomial
model_30m_agy_sqrt_humid	1.649_x000D_ (1.52–1.773)	-0.039_x000D_ (-0.158–0.081)	-	-	-	-	-	-	-	-	-	-	-	-	-	113.045_x000D_ (41.757–243.036)	1.575_x000D_ (0.721–3.114)	1065.29	1057.46	-2780.75	3.05594e-07	12.1988	0.0609941	0.996203	1.26847	1.6099	0.194105	0.246351	1.51063	20.7169	0.81535	0.703 / 0.754 / 0.831	0.765233	42.5547	no	nbinomial
model_30m_agy_sqrt_precip	1.646_x000D_ (1.518–1.77)	-	-0.099_x000D_ (-0.216–0.019)	-	-	-	-	-	-	-	-	-	-	-	-	111.298_x000D_ (40.195–232.974)	1.577_x000D_ (0.74–3.142)	1063.34	1051.27	-2650.06	2.4842e-06	22.4897	0.112448	0.995132	1.18872	1.48481	0.181901	0.227208	19762.7	1.12671e+06	529.998	503.726 / 535.266 / 551.033	1	55.8602	no	nbinomial
model_30m_agy_sqrt_temp	1.643_x000D_ (1.517–1.764)	-	-	0.047_x000D_ (-0.071–0.165)	-	-	-	-	-	-	-	-	-	-	-	111.689_x000D_ (47.143–226.643)	1.532_x000D_ (0.75–2.79)	1056.3	1048.1	-2519.36	1.22016e-05	12.1323	0.0606617	0.995895	1.16151	1.43763	0.177737	0.219989	2.16426	31.5361	0.679577	0.566 / 0.621 / 0.703	0.256524	42.858	no	nbinomial
model_30m_agy_IBP_num	2.01_x000D_ (1.727–2.288)	-	-	-	0.17_x000D_ (0.047–0.293)	-	-	-	-	-	-	-	-	-	-	97.095_x000D_ (36.712–212.685)	1.734_x000D_ (0.751–3.463)	1068.67	1062.12	-2724.66	3.85847e-07	15.0133	0.0750663	0.991906	1.38613	1.77505	0.212109	0.271622	2.02097	26.8997	0.541507	0.422 / 0.479 / 0.562	0.100783	51.8154	yes	nbinomial
model_30m_agy_sqrt_PC1	1.648_x000D_ (1.52–1.771)	-	-	-	-	0.085_x000D_ (-0.032–0.203)	-	-	-	-	-	-	-	-	-	108.238_x000D_ (40.003–226.499)	1.626_x000D_ (0.761–3.211)	1064.48	1049.71	-2751.57	7.01366e-07	29.2244	0.146122	0.996031	1.19289	1.49968	0.182538	0.229485	2.27033	28.1294	0.592494	0.468 / 0.534 / 0.625	0.150386	50.8226	no	nbinomial
model_30m_agy_sqrt_PC2	1.648_x000D_ (1.52–1.77)	-	-	-	-	-	0.173_x000D_ (0.058–0.288)	-	-	-	-	-	-	-	-	113.068_x000D_ (44.377–236.429)	1.507_x000D_ (0.712–2.876)	1062.07	1051.73	-2689.42	1.68568e-06	16.2598	0.0812992	0.993227	1.27742	1.59439	0.195473	0.243978	2.37085	100.785	0.637339	0.487 / 0.575 / 0.714	0.266727	51.1771	yes	nbinomial
model_30m_agy_sqrt_PC3	1.639_x000D_ (1.512–1.761)	-	-	-	-	-	-	0.076_x000D_ (-0.041–0.193)	-	-	-	-	-	-	-	110.295_x000D_ (40.936–220.226)	1.589_x000D_ (0.792–3.106)	1059.13	1045.51	-2714.45	1.24463e-06	32.5725	0.162863	0.996014	1.14717	1.40172	0.175542	0.214494	2.42413	57.4828	0.628315	0.495 / 0.573 / 0.676	0.213629	62.9236	no	nbinomial
model_30m_agy_sqrt_PC4	1.642_x000D_ (1.514–1.766)	-	-	-	-	-	-	-	-0.015_x000D_ (-0.133–0.103)	-	-	-	-	-	-	111.635_x000D_ (41.298–230.985)	1.586_x000D_ (0.761–3.108)	1062.63	1050.72	-2704.15	1.43716e-06	22.1281	0.11064	0.996481	1.19511	1.48109	0.182879	0.22664	1.79028	25.4874	0.574622	0.456 / 0.518 / 0.606	0.133363	51.4174	no	nbinomial
model_30m_agy_sqrt_PC5	1.643_x000D_ (1.515–1.766)	-	-	-	-	-	-	-	-	-0.107_x000D_ (-0.226–0.012)	-	-	-	-	-	106.696_x000D_ (38.836–221.764)	1.639_x000D_ (0.772–3.274)	1061.59	1049.95	-2694.29	1.98608e-06	20.9327	0.104664	0.995869	1.20672	1.51004	0.184655	0.231069	1.29067	25.6619	0.603445	0.473 / 0.545 / 0.645	0.173891	56.0001	no	nbinomial
model_30m_agy_sqrt_PC6	1.645_x000D_ (1.516–1.768)	-	-	-	-	-	-	-	-	-	-0.039_x000D_ (-0.157–0.079)	-	-	-	-	111.558_x000D_ (40.52–233.846)	1.597_x000D_ (0.75–3.166)	1067	1051.69	-2802.88	3.1616e-07	27.9759	0.139879	0.99648	1.20995	1.50664	0.185149	0.230549	1.69099	24.5193	0.65649	0.497 / 0.588 / 0.732	0.29305	59.2598	no	nbinomial
model_30m_agy_sqrt_PC7	1.646_x000D_ (1.521–1.767)	-	-	-	-	-	-	-	-	-	-	-0.17_x000D_ (-0.286–-0.055)	-	-	-	106.829_x000D_ (39.632–208.166)	1.561_x000D_ (0.796–3.067)	1057.45	1047.89	-2596.84	4.60471e-06	16.2772	0.081386	0.994179	1.22771	1.51209	0.187867	0.231383	0.745566	18.2906	0.624074	0.501 / 0.576 / 0.669	0.197509	54.7147	yes	nbinomial
model_30m_agy_sqrt_PC8	1.642_x000D_ (1.513–1.766)	-	-	-	-	-	-	-	-	-	-	-	0.041_x000D_ (-0.075–0.158)	-	-	114.908_x000D_ (41.9–236.104)	1.546_x000D_ (0.752–3.029)	1065.17	1050.66	-2804.06	3.25784e-07	29.9673	0.149836	0.996486	1.19824	1.48801	0.183357	0.227699	1.9285	28.9776	0.59158	0.47 / 0.537 / 0.632	0.156586	48.5132	no	nbinomial
model_30m_agy_sqrt_PC9	1.651_x000D_ (1.521–1.775)	-	-	-	-	-	-	-	-	-	-	-	-	0.096_x000D_ (-0.017–0.209)	-	107.746_x000D_ (41.586–218.931)	1.612_x000D_ (0.78–3.119)	1067.25	1052.28	-2773.45	4.82455e-07	25.3166	0.126583	0.995654	1.21972	1.54586	0.186644	0.236551	1.937	26.9458	0.563224	0.446 / 0.506 / 0.592	0.120794	56.989	no	nbinomial
model_30m_agy_sqrt_PC10	1.646_x000D_ (1.521–1.769)	-	-	-	-	-	-	-	-	-	-	-	-	-	-0.082_x000D_ (-0.199–0.036)	109.529_x000D_ (41.31–215.759)	1.584_x000D_ (0.8–3.073)	1060.77	1047.51	-2818.45	2.12543e-07	31.7672	0.158836	0.995897	1.16461	1.42607	0.178211	0.21822	1.2763	23.6981	0.603459	0.48 / 0.548 / 0.643	0.166958	70.0284	no	nbinomial

## Sheet: Table_S14_aedestotal_50m
Model	Intercept	sqrt_humid	sqrt_precip	sqrt_temp	IBP_num	sqrt_PC1	sqrt_PC2	sqrt_PC3	sqrt_PC4	sqrt_PC5	sqrt_PC6	sqrt_PC7	sqrt_PC8	sqrt_PC9	sqrt_PC10	Range	Stdev	DIC	WAIC	LPML	CPO_median	cpo_failures	cpo_failure_rate	correlation	MAE	RMSE	MAE_rel	RMSE_rel	min_pred	max_pred	CV_mean	CV_q25_q50_q75	CV_high_prop	Time	non_zero_CrI	model_family
model_50m_agy_	1.644_x000D_ (1.515–1.767)	-	-	-	-	-	-	-	-	-	-	-	-	-	-	111.952_x000D_ (41.948–230.845)	1.578_x000D_ (0.76–3.069)	1064.39	1050.04	-2753.88	5.7005e-07	29.1662	0.145831	0.996423	1.20206	1.49001	0.183941	0.228005	1.80975	25.6474	0.570517	0.453 / 0.514 / 0.602	0.129587	53.4401	yes	nbinomial
model_50m_agy_sqrt_humid	1.643_x000D_ (1.513–1.772)	-0.039_x000D_ (-0.158–0.081)	-	-	-	-	-	-	-	-	-	-	-	-	-	115.107_x000D_ (41.907–230.447)	1.541_x000D_ (0.776–3.008)	1065.48	1048.68	-2762.04	5.78603e-07	30.6584	0.153292	0.996359	1.14786	1.41768	0.175647	0.216936	1.49466	21.5615	0.819553	0.709 / 0.761 / 0.839	0.792233	53.4053	no	nbinomial
model_50m_agy_sqrt_precip	1.654_x000D_ (1.525–1.778)	-	-0.099_x000D_ (-0.215–0.019)	-	-	-	-	-	-	-	-	-	-	-	-	112.461_x000D_ (41.181–227.08)	1.543_x000D_ (0.763–3.059)	1070.01	1060.01	-2809.22	2.27843e-07	19.3261	0.0966307	0.994748	1.31053	1.67007	0.20054	0.255558	19031.3	1.00787e+06	500.878	476.787 / 505.707 / 520.119	1	51.3881	no	nbinomial
model_50m_agy_sqrt_temp	1.651_x000D_ (1.522–1.779)	-	-	0.042_x000D_ (-0.077–0.16)	-	-	-	-	-	-	-	-	-	-	-	112.317_x000D_ (41.176–233.655)	1.576_x000D_ (0.751–3.097)	1063.48	1051	-2773.37	7.23299e-07	26.9939	0.13497	0.9961	1.1714	1.44587	0.17925	0.22125	2.1809	30.9738	0.682905	0.57 / 0.625 / 0.707	0.264585	52.478	no	nbinomial
model_50m_agy_IBP_num	2.002_x000D_ (1.721–2.277)	-	-	-	0.17_x000D_ (0.048–0.292)	-	-	-	-	-	-	-	-	-	-	97.044_x000D_ (38.081–211.348)	1.734_x000D_ (0.759–3.362)	1067.47	1052.22	-2633.75	3.23692e-06	24.9074	0.124537	0.99297	1.26338	1.58336	0.193325	0.242289	1.92248	28.2952	0.553672	0.43 / 0.489 / 0.575	0.110704	65.8546	yes	nbinomial
model_50m_agy_sqrt_PC1	1.648_x000D_ (1.522–1.769)	-	-	-	-	0.145_x000D_ (0.029–0.262)	-	-	-	-	-	-	-	-	-	106.887_x000D_ (37.638–222.164)	1.635_x000D_ (0.762–3.336)	1058.26	1045.24	-2671.03	1.76528e-06	30.1159	0.150579	0.995266	1.1628	1.4647	0.177935	0.224132	2.72679	32.4354	0.586594	0.465 / 0.53 / 0.618	0.141029	89.1457	yes	nbinomial
model_50m_agy_sqrt_PC2	1.64_x000D_ (1.514–1.761)	-	-	-	-	-	0.136_x000D_ (0.021–0.252)	-	-	-	-	-	-	-	-	109.336_x000D_ (40.988–223.059)	1.586_x000D_ (0.767–3.099)	1056.77	1043.68	-2604.52	7.36465e-06	25.8195	0.129097	0.995147	1.15994	1.41731	0.177497	0.21688	2.40968	63.697	0.657724	0.51 / 0.596 / 0.724	0.285835	46.1976	yes	nbinomial
model_50m_agy_sqrt_PC3	1.647_x000D_ (1.52–1.769)	-	-	-	-	-	-	0.116_x000D_ (-0.002–0.233)	-	-	-	-	-	-	-	107.633_x000D_ (38.579–232.946)	1.619_x000D_ (0.724–3.259)	1061.07	1053.25	-2667.75	1.07222e-06	10.2841	0.0514203	0.994887	1.25271	1.55911	0.191692	0.238579	3.10034	62.3564	0.617878	0.489 / 0.562 / 0.659	0.185052	68.499	no	nbinomial
model_50m_agy_sqrt_PC4	1.639_x000D_ (1.512–1.761)	-	-	-	-	-	-	-	0.023_x000D_ (-0.096–0.142)	-	-	-	-	-	-	114.265_x000D_ (42.847–237.263)	1.553_x000D_ (0.741–3.016)	1058.97	1046.4	-2613.59	4.92332e-06	21.6493	0.108247	0.996304	1.14547	1.4047	0.175282	0.21495	1.79662	25.5099	0.5781	0.46 / 0.522 / 0.611	0.13776	67.4914	no	nbinomial
model_50m_agy_sqrt_PC5	1.643_x000D_ (1.517–1.765)	-	-	-	-	-	-	-	-	-0.165_x000D_ (-0.283–-0.048)	-	-	-	-	-	106.147_x000D_ (38.186–220.448)	1.625_x000D_ (0.765–3.26)	1061.76	1047.3	-2675.37	2.22986e-06	27.8867	0.139433	0.994451	1.21038	1.5053	0.185216	0.230344	1.00499	21.5472	0.592236	0.469 / 0.536 / 0.631	0.15343	43.7653	yes	nbinomial
model_50m_agy_sqrt_PC6	1.641_x000D_ (1.512–1.769)	-	-	-	-	-	-	-	-	-	-0.036_x000D_ (-0.156–0.084)	-	-	-	-	111.939_x000D_ (42.479–228.498)	1.575_x000D_ (0.768–3.038)	1059.13	1046.46	-2627.6	3.50526e-06	23.2414	0.116207	0.99649	1.13898	1.40003	0.174289	0.214236	1.65678	24.2782	0.666661	0.511 / 0.601 / 0.739	0.30376	62.7278	no	nbinomial
model_50m_agy_sqrt_PC7	1.647_x000D_ (1.519–1.77)	-	-	-	-	-	-	-	-	-	-	-0.119_x000D_ (-0.236–-0.001)	-	-	-	106.687_x000D_ (39.801–218.433)	1.612_x000D_ (0.773–3.168)	1063.03	1051.58	-2706.77	1.27232e-06	22.0206	0.110103	0.994995	1.23904	1.52705	0.1896	0.233672	1.07041	18.1024	0.637441	0.513 / 0.585 / 0.676	0.205513	43.8956	yes	nbinomial
model_50m_agy_sqrt_PC8	1.642_x000D_ (1.513–1.766)	-	-	-	-	-	-	-	-	-	-	-	0.022_x000D_ (-0.093–0.138)	-	-	113.534_x000D_ (43.479–228.167)	1.55_x000D_ (0.776–2.965)	1064.26	1050.62	-2779.99	4.54841e-07	28.4976	0.142488	0.996528	1.1971	1.48581	0.183183	0.227362	1.89047	26.8533	0.592329	0.472 / 0.539 / 0.63	0.154445	51.3045	no	nbinomial
model_50m_agy_sqrt_PC9	1.643_x000D_ (1.514–1.766)	-	-	-	-	-	-	-	-	-	-	-	-	0.112_x000D_ (-0.002–0.227)	-	105.137_x000D_ (35.076–221.778)	1.682_x000D_ (0.774–3.511)	1063.19	1051.06	-2747.22	9.76578e-07	22.2102	0.111051	0.995759	1.20847	1.53053	0.184923	0.234204	1.93681	28.4276	0.569498	0.452 / 0.512 / 0.599	0.126881	59.7345	no	nbinomial
model_50m_agy_sqrt_PC10	1.662_x000D_ (1.531–1.787)	-	-	-	-	-	-	-	-	-	-	-	-	-	-0.106_x000D_ (-0.223–0.011)	108.256_x000D_ (40.213–224.38)	1.61_x000D_ (0.761–3.17)	1066.66	1052.9	-2747.02	7.98756e-07	28.2579	0.141289	0.99551	1.22104	1.51271	0.186846	0.231478	1.17936	21.8987	0.597414	0.474 / 0.541 / 0.632	0.153486	45.0738	no	nbinomial

## Sheet: Table_S15_aedestotal_100m
Model	Intercept	sqrt_humid	sqrt_precip	sqrt_temp	IBP_num	sqrt_PC1	sqrt_PC2	sqrt_PC3	sqrt_PC4	sqrt_PC5	sqrt_PC6	sqrt_PC7	sqrt_PC8	sqrt_PC9	sqrt_PC10	Range	Stdev	DIC	WAIC	LPML	CPO_median	cpo_failures	cpo_failure_rate	correlation	MAE	RMSE	MAE_rel	RMSE_rel	min_pred	max_pred	CV_mean	CV_q25_q50_q75	CV_high_prop	Time	non_zero_CrI	model_family
model_100m_agy_	1.641_x000D_ (1.514–1.764)	-	-	-	-	-	-	-	-	-	-	-	-	-	-	111.397_x000D_ (40.803–230.529)	1.581_x000D_ (0.755–3.113)	1059.82	1048.22	-2630.45	2.88591e-06	19.9222	0.0996111	0.99645	1.1773	1.45514	0.180153	0.222668	1.78094	25.7649	0.574572	0.456 / 0.518 / 0.607	0.134209	45.443	yes	nbinomial
model_100m_agy_sqrt_humid	1.642_x000D_ (1.513–1.765)	-0.035_x000D_ (-0.155–0.085)	-	-	-	-	-	-	-	-	-	-	-	-	-	113.739_x000D_ (41.863–236.433)	1.557_x000D_ (0.743–3.05)	1062.09	1049.91	-2684.38	1.5348e-06	22.7465	0.113732	0.996367	1.17487	1.46251	0.179781	0.223797	1.52334	21.9976	0.824403	0.712 / 0.764 / 0.843	0.801251	75.9541	no	nbinomial
model_100m_agy_sqrt_precip	1.646_x000D_ (1.518–1.769)	-	-0.093_x000D_ (-0.211–0.025)	-	-	-	-	-	-	-	-	-	-	-	-	112.437_x000D_ (41.1–228.089)	1.552_x000D_ (0.766–3.049)	1064.76	1052.06	-2680	1.42157e-06	24.4033	0.122017	0.995259	1.20263	1.50362	0.184029	0.230088	37971.3	2.23644e+06	520.505	495.097 / 525.825 / 540.85	1	54.6065	no	nbinomial
model_100m_agy_sqrt_temp	1.647_x000D_ (1.517–1.77)	-	-	0.04_x000D_ (-0.079–0.159)	-	-	-	-	-	-	-	-	-	-	-	111.935_x000D_ (41.489–231.072)	1.57_x000D_ (0.751–3.089)	1064.28	1053.78	-2743.56	7.32298e-07	18.703	0.0935151	0.996093	1.22147	1.52649	0.186912	0.233587	2.21063	30.2965	0.676908	0.566 / 0.62 / 0.7	0.250155	58.0657	no	nbinomial
model_100m_agy_IBP_num	1.999_x000D_ (1.718–2.276)	-	-	-	0.17_x000D_ (0.047–0.293)	-	-	-	-	-	-	-	-	-	-	97.426_x000D_ (39.36–209.126)	1.721_x000D_ (0.764–3.278)	1063.63	1050.58	-2636.86	2.64228e-06	25.7891	0.128946	0.993202	1.23865	1.54622	0.189541	0.236606	1.90729	28.4459	0.558212	0.434 / 0.493 / 0.58	0.114142	53.4985	yes	nbinomial
model_100m_agy_sqrt_PC1	1.645_x000D_ (1.519–1.767)	-	-	-	-	0.145_x000D_ (0.028–0.263)	-	-	-	-	-	-	-	-	-	112.883_x000D_ (40.421–235.82)	1.554_x000D_ (0.736–3.091)	1060.25	1046.04	-2656.94	2.71187e-06	30.2629	0.151314	0.995099	1.16737	1.47001	0.178634	0.224945	2.85325	34.553	0.584682	0.469 / 0.531 / 0.617	0.136858	55.5386	yes	nbinomial
model_100m_agy_sqrt_PC2	1.651_x000D_ (1.522–1.774)	-	-	-	-	-	0.06_x000D_ (-0.056–0.175)	-	-	-	-	-	-	-	-	110.584_x000D_ (43.28–223.199)	1.549_x000D_ (0.762–2.96)	1066.92	1056.78	-2818.31	1.86333e-07	21.5194	0.107597	0.995795	1.2905	1.61858	0.197475	0.247679	2.23319	32.4876	0.646156	0.51 / 0.589 / 0.701	0.251226	60.281	no	nbinomial
model_100m_agy_sqrt_PC3	1.645_x000D_ (1.519–1.766)	-	-	-	-	-	-	0.155_x000D_ (0.036–0.274)	-	-	-	-	-	-	-	100.902_x000D_ (37.495–207.71)	1.688_x000D_ (0.795–3.352)	1062.86	1049.07	-2648.96	2.19724e-06	27.2899	0.136449	0.994261	1.22391	1.50433	0.187285	0.230197	3.77116	49.9245	0.614638	0.487 / 0.558 / 0.648	0.169156	51.9689	yes	nbinomial
model_100m_agy_sqrt_PC4	1.646_x000D_ (1.516–1.771)	-	-	-	-	-	-	-	-0.022_x000D_ (-0.145–0.1)	-	-	-	-	-	-	110.483_x000D_ (37.981–230.417)	1.626_x000D_ (0.771–3.304)	1064.79	1052.17	-2882.01	1.2988e-07	26.3231	0.131616	0.996706	1.2001	1.48894	0.183642	0.227841	1.78944	25.783	0.577671	0.46 / 0.522 / 0.611	0.136858	51.4175	no	nbinomial
model_100m_agy_sqrt_PC5	1.649_x000D_ (1.522–1.772)	-	-	-	-	-	-	-	-	-0.143_x000D_ (-0.262–-0.024)	-	-	-	-	-	102.695_x000D_ (39.402–208.125)	1.655_x000D_ (0.797–3.223)	1059.85	1048.54	-2717.54	1.84776e-06	22.0292	0.110146	0.994968	1.19804	1.4943	0.183327	0.228661	1.29751	19.6559	0.600909	0.476 / 0.542 / 0.635	0.157939	46.104	yes	nbinomial
model_100m_agy_sqrt_PC6	1.637_x000D_ (1.512–1.759)	-	-	-	-	-	-	-	-	-	-0.063_x000D_ (-0.184–0.059)	-	-	-	-	111.224_x000D_ (42.801–227.181)	1.584_x000D_ (0.77–3.037)	1057.25	1043.9	-2675.23	2.80164e-06	30.8974	0.154487	0.99622	1.11865	1.36753	0.171178	0.209263	1.53241	21.254	0.669422	0.522 / 0.607 / 0.733	0.298856	57.3965	no	nbinomial
model_100m_agy_sqrt_PC7	1.654_x000D_ (1.526–1.778)	-	-	-	-	-	-	-	-	-	-	-0.077_x000D_ (-0.194–0.041)	-	-	-	106.927_x000D_ (39.384–224.566)	1.644_x000D_ (0.762–3.298)	1072.85	1058.44	-2827.63	1.23156e-07	22.8019	0.11401	0.995232	1.32554	1.66106	0.202838	0.254178	1.33239	17.9772	0.626847	0.509 / 0.575 / 0.659	0.179753	56.8623	no	nbinomial
model_100m_agy_sqrt_PC8	1.633_x000D_ (1.508–1.752)	-	-	-	-	-	-	-	-	-	-	-	0.084_x000D_ (-0.029–0.198)	-	-	115.975_x000D_ (46.056–224.222)	1.546_x000D_ (0.805–2.906)	1052.44	1039.52	-2827.24	1.95769e-07	17.5035	0.0875174	0.996068	1.11203	1.35566	0.170165	0.207446	2.1422	31.7336	0.58598	0.471 / 0.535 / 0.623	0.145088	62.2436	no	nbinomial
model_100m_agy_sqrt_PC9	1.646_x000D_ (1.517–1.77)	-	-	-	-	-	-	-	-	-	-	-	-	0.097_x000D_ (-0.018–0.213)	-	110.75_x000D_ (40.179–233.222)	1.588_x000D_ (0.741–3.167)	1066.02	1054.37	-2763.06	6.95528e-07	18.3774	0.0918869	0.99562	1.24477	1.59705	0.190477	0.244385	1.90933	29.4474	0.565421	0.449 / 0.509 / 0.595	0.12271	52.5224	no	nbinomial
model_100m_agy_sqrt_PC10	1.656_x000D_ (1.528–1.778)	-	-	-	-	-	-	-	-	-	-	-	-	-	-0.153_x000D_ (-0.269–-0.036)	105.232_x000D_ (37.382–222.963)	1.621_x000D_ (0.741–3.299)	1065.84	1056.89	-2713.31	6.97971e-07	14.5132	0.0725659	0.99355	1.31579	1.67238	0.201344	0.255911	1.08784	18.5326	0.57507	0.458 / 0.52 / 0.604	0.125021	61.1159	yes	nbinomial
