# Supplementary material
Source: Research Square preprint supplement (doi:10.21203/rs.3.rs-9762487/v1)
Supplement: Supplementary file 3 [file 645e3026a838bbf3d6831918.xlsx]

## Sheet: Read Me
Read me
Each worksheet is labeled according to the buffer radius used. Within each worksheet, regression models are identified by the covariates included. Models are further characterized by the buffer radius used for spatial aggregation of covariates (20, 30, 50, and 100 m).
The prefix “PC_” indicates that the covariate represents the percentage of a given land-use and land-cover class within the buffer. The prefix “sqrt_PC” indicates square-root of the percentage of each variable. Land-use and land-cover classes were maintained as coded categories to facilitate data organization.
Variables:
IBP_num — IBP index
humidity — relative humidity (%)
precipitation — precipitation (mm)
temperature — temperature (°C)
sqrt_humid — square-root transformation of humidity
sqrt_precip — square-root transformation of precipitation
sqrt_temp — square-root transformation of temperature
Land-use and land-cover variables:
PC1 / sqrt_PC1 — Cement
PC2 / sqrt_PC2 — Tree
PC3 / sqrt_PC3 — Asbestos tile
PC4 / sqrt_PC4 — Swimming pool
PC5 / sqrt_PC5 — Exposed soil
PC6 / sqrt_PC6 — Grass
PC7 / sqrt_PC7 — Asphalt
PC8 / sqrt_PC8 — Zinc tile
PC9 / sqrt_PC9 — Shade
PC10 / sqrt_PC10 — Ceramic tile
Each worksheet contains regression model summaries with the following columns:
Model: Identifier of the fitted model, indicating the spatial buffer used, the response variable, and the set of covariates included.
Intercept: Posterior mean estimate of the intercept (expected value of the dependent variable when all covariates are equal to zero), along with the 95% credible interval.
Covariates (e.g., sqrt_, IBP_num, etc.): Posterior mean estimates of the coefficients for the independent variables, with their respective 95% credible intervals. These represent the direction (positive/negative) and magnitude of the association with the dependent variable.
Range: Posterior mean and 95% credible interval of the spatial range parameter (SPDE), indicating the approximate distance beyond which spatial autocorrelation becomes negligible.
Stdev: Posterior mean and 95% credible interval of the spatial standard deviation parameter (SPDE), representing the magnitude of residual spatial variability captured by the latent Gaussian field. Higher values indicate stronger spatial heterogeneity not explained by the covariates.
DIC (Deviance Information Criterion): Measure of model fit that accounts for model complexity. Lower values indicate a better balance between goodness of fit and parsimony.
WAIC (Watanabe–Akaike Information Criterion): Fully Bayesian criterion for model comparison, with emphasis on predictive performance. Lower values indicate better predictive accuracy.
LPML (Log Pseudo Marginal Likelihood): Measure of overall predictive performance based on CPO. Higher values indicate better predictive ability.
CPO (Conditional Predictive Ordinate, median): Summary of pointwise predictive performance based on leave-one-out cross-validation. Higher values indicate better predictive performance.
cpo_failures: Number of observations for which the CPO could not be reliably estimated (missing or unstable values), potentially indicating model fit issues or numerical instability.
cpo_failure_rate: Proportion of observations with CPO failures. Lower values indicate greater model stability and more reliable predictive inference.
correlation: Pearson correlation between observed and predicted values at the sampled locations. Values closer to 1 indicate better agreement between observed and predicted values.
MAE (Mean Absolute Error): Average absolute difference between observed and predicted values, representing the typical magnitude of prediction errors. Lower values indicate better predictive accuracy.
RMSE (Root Mean Squared Error): Square root of the average squared differences between observed and predicted values. It gives greater weight to large errors, making it sensitive to extreme deviations. Lower values indicate better model performance.
MAE_rel (Relative Mean Absolute Error): The MAE normalized by the mean of the observed values, representing the average prediction error relative to the magnitude of the response variable. It can be interpreted as the typical percentage error. Lower values indicate better predictive accuracy.
RMSE_rel (Relative Root Mean Squared Error): The RMSE normalized by the mean of the observed values, representing the typical prediction error with greater emphasis on large deviations, relative to the magnitude of the response variable. Lower values indicate better model performance.
min_pred: Minimum predicted value over the spatial prediction grid, indicating the lowest estimated intensity of the response variable.
max_pred: Maximum predicted value over the spatial prediction grid, indicating the highest estimated intensity of the response variable.
CV_mean (Coefficient of Variation, mean): Mean coefficient of variation across the prediction grid, representing the average relative uncertainty of the model predictions. Lower values indicate more stable predictions.
CV_q25_q50_q75 (Coefficient of Variation quartiles): First quartile (Q25), median (Q50), and third quartile (Q75) of the coefficient of variation across the prediction grid, summarizing the distribution of relative uncertainty.
CV_high_prop (Proportion of high uncertainty): Proportion of grid cells with coefficient of variation greater than 0.7, representing the spatial extent of high prediction uncertainty. Lower values indicate a more reliable prediction surface.
Time: Total model execution time (in seconds).
non_zero_CrI: Indicator of whether the 95% credible intervals for all coefficients (including the intercept) exclude zero.
"yes": none of the intervals include zero
"no": at least one interval includes zero
model_family: Probability distribution assumed for the response variable (e.g., Poisson or negative binomial).
DIC, WAIC, LPML and CPO-based metrics are computed using the observed data and evaluate overall model fit and predictive performance based on the sampled locations.
Correlation, MAE, RMSE, MAE_rel and RMSE_rel are calculated by comparing observed and predicted values at the sampled locations, providing measures of prediction accuracy.
The coefficient of variation (CV) was calculated as the ratio between the posterior standard deviation and posterior mean prediction for each grid cell.
Spatial prediction summaries (min_pred, max_pred, and CV metrics) were computed using predictions over the continuous spatial prediction grid generated from the fitted SPDE models, representing the range of predicted values and associated uncertainty at unsampled locations.

## Sheet: Table_S8_females_20m
Model	Intercept	IBP_num	sqrt_precip	sqrt_PC2	Range	Stdev	DIC	WAIC	LPML	CPO_median	cpo_failures	cpo_failure_rate	correlation	MAE	RMSE	MAE_rel	RMSE_rel	min_pred	max_pred	CV_mean	CV_q25_q50_q75	CV_high_prop	Time	non_zero_CrI	model_family
model_20m_f_	1.129_x000D_ (0.994–1.256)	-	-	-	156.391_x000D_ (51.263–345.915)	1.057_x000D_ (0.521–2.024)	908.563	900.099	-1955.51	0.000226733	29.336	0.14668	0.989366	1.10364	1.35641	0.299496	0.36809	1.7271	9.86909	0.47909	0.401 / 0.448 / 0.514	0.0546756	39.2543	yes	nbinomial
model_20m_f_IBP_num	1.516_x000D_ (1.245–1.781)	0.187_x000D_ (0.068–0.307)	-	-	131.379_x000D_ (44.107–287.367)	1.161_x000D_ (0.543–2.316)	905.043	897.691	-1844.96	0.000321706	26.4374	0.132187	0.970346	1.13448	1.4163	0.307865	0.384343	1.69813	11.2221	0.455081	0.375 / 0.42 / 0.484	0.0502226	48.1687	yes	nbinomial
model_20m_f_sqrt_precip	1.133_x000D_ (0.999–1.259)	-	-0.142_x000D_ (-0.258–-0.025)	-	160.59_x000D_ (49.659–362.691)	1.019_x000D_ (0.494–1.998)	909.617	901.539	-1878.52	0.000268659	26.0136	0.130068	0.977624	1.14635	1.41087	0.311086	0.382867	1.73072	10.3823	0.463447	0.392 / 0.436 / 0.497	0.045206	39.5503	yes	nbinomial
model_20m_f_sqrt_PC2	1.125_x000D_ (0.993–1.251)	-	-	0.127_x000D_ (0.012–0.242)	169.404_x000D_ (54.7–380.575)	0.985_x000D_ (0.487–1.87)	904.92	897.558	-1897.67	0.000202421	20.4104	0.102052	0.982391	1.0962	1.34369	0.297478	0.364637	1.65527	8.85852	0.477458	0.405 / 0.45 / 0.513	0.0494899	40.084	yes	nbinomial
model_20m_f_IBP_num_sqrt_precip	1.442_x000D_ (1.143–1.734)	0.151_x000D_ (0.019–0.285)	-0.077_x000D_ (-0.205–0.051)	-	139.539_x000D_ (42.276–311.846)	1.123_x000D_ (0.528–2.293)	907.384	898.75	-1833.87	0.000325913	26.0823	0.130412	0.969108	1.128	1.40523	0.306107	0.381337	1.6593	10.4291	0.458581	0.382 / 0.426 / 0.489	0.0485316	43.0057	no	nbinomial
model_20m_f_IBP_num_sqrt_PC2	1.535_x000D_ (1.264–1.799)	0.196_x000D_ (0.077–0.315)	-	0.136_x000D_ (0.025–0.248)	140.452_x000D_ (41.334–326.292)	1.109_x000D_ (0.494–2.312)	905.381	898.215	-1790.51	0.000708911	18.8254	0.0941271	0.958183	1.16651	1.46182	0.316556	0.396695	1.60483	11.778	0.446469	0.372 / 0.415 / 0.475	0.0435714	37.5031	yes	nbinomial
model_20m_f_IBP_num_sqrt_precip_sqrt_PC2	1.477_x000D_ (1.18–1.767)	0.166_x000D_ (0.034–0.299)	-0.063_x000D_ (-0.19–0.065)	0.131_x000D_ (0.019–0.243)	147.089_x000D_ (41.21–351.945)	1.085_x000D_ (0.475–2.288)	907.432	900.927	-1844.48	0.00106075	17.8956	0.0894778	0.953623	1.19569	1.4992	0.324475	0.406838	1.59039	10.3437	0.442206	0.371 / 0.412 / 0.47	0.0397385	36.5846	no	nbinomial

## Sheet: Table_S9_females_30m
Model	Intercept	IBP_num	sqrt_precip	sqrt_PC2	sqrt_PC3	sqrt_PC5	sqrt_PC7	sqrt_PC9	Range	Stdev	DIC	WAIC	LPML	CPO_median	cpo_failures	cpo_failure_rate	correlation	MAE	RMSE	MAE_rel	RMSE_rel	min_pred	max_pred	CV_mean	CV_q25_q50_q75	CV_high_prop	Time	non_zero_CrI	model_family
model_30m_f_	1.128_x000D_ (0.994–1.256)	-	-	-	-	-	-	-	156.422_x000D_ (51.558–348.158)	1.057_x000D_ (0.519–2.02)	907.932	899.963	-1943.48	0.000230565	24.0155	0.120077	0.989377	1.10173	1.35401	0.298978	0.367438	1.72419	9.87526	0.479726	0.401 / 0.448 / 0.515	0.0550138	34.98	yes	nbinomial
model_30m_f_IBP_num	1.514_x000D_ (1.241–1.78)	0.187_x000D_ (0.068–0.307)	-	-	-	-	-	-	134.729_x000D_ (41.614–296.036)	1.159_x000D_ (0.549–2.362)	906.202	897.341	-1852.37	0.000279318	26.1552	0.130776	0.971626	1.12315	1.40012	0.304791	0.37995	1.69615	11.0941	0.457884	0.379 / 0.424 / 0.488	0.0498844	47.137	yes	nbinomial
model_30m_f_sqrt_precip	1.134_x000D_ (1–1.259)	-	-0.142_x000D_ (-0.258–-0.026)	-	-	-	-	-	162.803_x000D_ (51.094–360.486)	1.003_x000D_ (0.503–1.934)	911.145	901.731	-1898.53	0.000259802	26.553	0.132765	0.977374	1.14713	1.41171	0.311296	0.383095	84.2929	1600.42	513.804	488.443 / 518.709 / 534.23	1	43.6545	yes	nbinomial
model_30m_f_sqrt_PC2	1.125_x000D_ (0.993–1.25)	-	-	0.18_x000D_ (0.066–0.295)	-	-	-	-	154.932_x000D_ (52.082–328.953)	1.015_x000D_ (0.525–1.908)	902.417	895.265	-1872.36	0.000208707	26.2014	0.131007	0.975575	1.10646	1.36631	0.300262	0.370777	2.16278	37.8491	0.55153	0.435 / 0.509 / 0.629	0.166	37.329	yes	nbinomial
model_30m_f_sqrt_PC3	1.139_x000D_ (1.002–1.265)	-	-	-	0.119_x000D_ (0.004–0.235)	-	-	-	141.775_x000D_ (45.322–313.017)	1.113_x000D_ (0.53–2.226)	910.017	904.899	-2164.99	0.000113536	12.7952	0.0639762	0.979727	1.19206	1.4785	0.323489	0.401221	2.19314	29.5689	0.50857	0.414 / 0.476 / 0.561	0.076715	44.3113	yes	nbinomial
model_30m_f_sqrt_PC5	1.135_x000D_ (0.997–1.264)	-	-	-	-	-0.152_x000D_ (-0.271–-0.033)	-	-	140.319_x000D_ (45.713–305.472)	1.124_x000D_ (0.549–2.227)	907.313	900.949	-1911.72	0.000499285	16.8472	0.0842358	0.979321	1.14378	1.41973	0.310389	0.385272	0.701106	9.63611	0.497146	0.405 / 0.463 / 0.545	0.0743476	45.105	yes	nbinomial
model_30m_f_sqrt_PC7	1.135_x000D_ (1–1.26)	-	-	-	-	-	-0.158_x000D_ (-0.273–-0.044)	-	159.843_x000D_ (51.695–349.632)	1_x000D_ (0.506–1.907)	907.429	901.025	-1862.08	0.0008485	23.6618	0.118309	0.975199	1.1724	1.44042	0.318154	0.390888	0.69271	7.07177	0.527373	0.442 / 0.506 / 0.58	0.0742348	37.7756	yes	nbinomial
model_30m_f_sqrt_PC9	1.132_x000D_ (0.996–1.258)	-	-	-	-	-	-	0.118_x000D_ (0.007–0.23)	152.852_x000D_ (50.681–333.741)	1.059_x000D_ (0.527–2.029)	908.466	900.623	-1962.53	0.000285145	25.7961	0.12898	0.981609	1.14691	1.4179	0.311238	0.384777	1.93386	10.2339	0.464748	0.389 / 0.434 / 0.497	0.0480244	35.339	yes	nbinomial
model_30m_f_IBP_num_sqrt_precip	1.451_x000D_ (1.154–1.743)	0.151_x000D_ (0.019–0.285)	-0.077_x000D_ (-0.205–0.05)	-	-	-	-	-	138.894_x000D_ (40.952–324.985)	1.142_x000D_ (0.503–2.398)	910.025	903.421	-1968.2	0.000211183	19.1358	0.095679	0.961719	1.20732	1.51841	0.327631	0.412052	4.21689e+06	2.89879e+08	564.301	541.786 / 569.123 / 582.754	1	42.8122	no	nbinomial
model_30m_f_IBP_num_sqrt_PC2	1.535_x000D_ (1.27–1.795)	0.19_x000D_ (0.074–0.307)	-	0.182_x000D_ (0.071–0.293)	-	-	-	-	128.06_x000D_ (41.849–281.99)	1.123_x000D_ (0.516–2.318)	903.726	900.487	-1770.52	0.00137767	11.4046	0.0570229	0.937693	1.26361	1.60154	0.342907	0.434611	1.95106	49.8899	0.498015	0.383 / 0.453 / 0.569	0.113861	41.8868	yes	nbinomial
model_30m_f_IBP_num_sqrt_PC3	1.472_x000D_ (1.177–1.759)	0.163_x000D_ (0.033–0.294)	-	-	0.057_x000D_ (-0.067–0.181)	-	-	-	131.576_x000D_ (39.456–305.955)	1.202_x000D_ (0.524–2.532)	907.734	901.765	-1909.62	0.000591386	19.9454	0.0997271	0.965395	1.18724	1.48764	0.322183	0.403703	1.95024	18.2948	0.511544	0.411 / 0.477 / 0.568	0.0856209	41.3461	no	nbinomial
model_30m_f_IBP_num_sqrt_PC5	1.439_x000D_ (1.148–1.723)	0.15_x000D_ (0.023–0.279)	-	-	-	-0.098_x000D_ (-0.224–0.028)	-	-	128.292_x000D_ (39.283–282.607)	1.203_x000D_ (0.56–2.491)	905.385	896.909	-1846.2	0.000252563	27.4868	0.137434	0.970348	1.11164	1.38379	0.301666	0.37552	0.933756	10.1246	0.500635	0.403 / 0.462 / 0.549	0.0791951	46.266	no	nbinomial
model_30m_f_IBP_num_sqrt_PC7	1.484_x000D_ (1.212–1.748)	0.171_x000D_ (0.053–0.29)	-	-	-	-	-0.141_x000D_ (-0.254–-0.027)	-	132.083_x000D_ (38.939–318.34)	1.187_x000D_ (0.494–2.525)	903.122	896.124	-1794.49	0.000348891	23.2302	0.116151	0.961741	1.14323	1.41717	0.310239	0.384577	0.72401	8.19924	0.523416	0.432 / 0.496 / 0.572	0.0744039	45.7666	yes	nbinomial
model_30m_f_IBP_num_sqrt_PC9	1.471_x000D_ (1.18–1.754)	0.162_x000D_ (0.035–0.291)	-	-	-	-	-	0.064_x000D_ (-0.053–0.182)	135.277_x000D_ (40.863–317.677)	1.179_x000D_ (0.512–2.469)	907.782	901.55	-1983.39	0.000224213	20.2585	0.101292	0.964439	1.19	1.49614	0.32293	0.406009	1.79563	10.2198	0.447353	0.37 / 0.414 / 0.475	0.0453188	48.7567	no	nbinomial
model_30m_f_IBP_num_sqrt_precip_sqrt_PC2	1.465_x000D_ (1.172–1.753)	0.157_x000D_ (0.027–0.288)	-0.072_x000D_ (-0.197–0.054)	0.179_x000D_ (0.068–0.291)	-	-	-	-	135.178_x000D_ (35.482–325.065)	1.128_x000D_ (0.475–2.508)	903.978	902.226	-2063.61	0.000264105	2.62784	0.0131392	0.935458	1.26705	1.60426	0.343841	0.435348	5.00439e+06	1.23456e+09	557.04	534.426 / 561.865 / 575.598	1	38.6116	no	nbinomial
model_30m_f_IBP_num_sqrt_precip_sqrt_PC3	1.39_x000D_ (1.071–1.705)	0.122_x000D_ (-0.022–0.267)	-0.083_x000D_ (-0.211–0.045)	-	0.064_x000D_ (-0.06–0.188)	-	-	-	135.409_x000D_ (41.947–309.679)	1.149_x000D_ (0.516–2.377)	911.254	904.535	-2007.57	0.000132812	19.3403	0.0967014	0.960124	1.21039	1.52183	0.328464	0.412979	2.77057e+06	2.09659e+08	557.983	535.914 / 562.586 / 576.035	1	44.8831	no	nbinomial
model_30m_f_IBP_num_sqrt_precip_sqrt_PC5	1.34_x000D_ (1.021–1.654)	0.097_x000D_ (-0.047–0.242)	-0.101_x000D_ (-0.229–0.029)	-	-	-0.117_x000D_ (-0.244–0.01)	-	-	130.834_x000D_ (39.849–297.651)	1.176_x000D_ (0.527–2.462)	908.343	902.519	-1962.41	0.000499406	18.2674	0.0913372	0.9584	1.19935	1.50784	0.325468	0.409184	335216	2.16996e+07	563.305	541.81 / 567.424 / 581.144	1	36.3559	no	nbinomial
model_30m_f_IBP_num_sqrt_precip_sqrt_PC7	1.43_x000D_ (1.134–1.72)	0.14_x000D_ (0.008–0.272)	-0.069_x000D_ (-0.195–0.058)	-	-	-	-0.137_x000D_ (-0.25–-0.023)	-	140.269_x000D_ (39.961–341.564)	1.129_x000D_ (0.475–2.439)	907.095	903.199	-1972.04	0.000369147	11.8295	0.0591476	0.948803	1.24764	1.55346	0.338572	0.421562	3.23095e+06	3.18653e+08	564.548	541.621 / 569.353 / 583.278	1	41.2233	no	nbinomial
model_30m_f_IBP_num_sqrt_precip_sqrt_PC9	1.402_x000D_ (1.088–1.709)	0.129_x000D_ (-0.01–0.27)	-0.074_x000D_ (-0.202–0.055)	-	-	-	-	0.061_x000D_ (-0.056–0.179)	139.618_x000D_ (39.963–331.625)	1.144_x000D_ (0.495–2.426)	908.944	902.847	-1964.69	0.000376361	16.6797	0.0833986	0.962527	1.18846	1.49215	0.322512	0.404925	8.00497e+06	5.07241e+08	564.128	541.699 / 568.94 / 582.552	1	38.9862	no	nbinomial
model_30m_f_IBP_num_sqrt_PC2_sqrt_PC3	1.429_x000D_ (1.142–1.711)	0.138_x000D_ (0.012–0.265)	-	0.213_x000D_ (0.099–0.328)	0.124_x000D_ (-0.002–0.249)	-	-	-	122.324_x000D_ (38.74–274.743)	1.16_x000D_ (0.513–2.451)	902.713	900.656	-1663.18	0.00224638	5.232	0.02616	0.928469	1.28667	1.6298	0.349164	0.442279	2.8371	76.0385	0.582645	0.462 / 0.561 / 0.676	0.209515	39.4523	no	nbinomial
model_30m_f_IBP_num_sqrt_PC2_sqrt_PC5	1.463_x000D_ (1.18–1.74)	0.16_x000D_ (0.036–0.286)	-	0.175_x000D_ (0.064–0.287)	-	-0.081_x000D_ (-0.205–0.044)	-	-	125.273_x000D_ (38.511–287.231)	1.189_x000D_ (0.519–2.503)	901.296	896.252	-1727.83	0.0013896	16.3219	0.0816096	0.946751	1.19803	1.50818	0.325109	0.409276	1.13034	44.2613	0.557729	0.432 / 0.525 / 0.648	0.176653	43.9942	no	nbinomial
model_30m_f_IBP_num_sqrt_PC2_sqrt_PC7	1.499_x000D_ (1.23–1.762)	0.181_x000D_ (0.063–0.3)	-	0.15_x000D_ (0.027–0.274)	-	-	-0.077_x000D_ (-0.201–0.048)	-	130.123_x000D_ (39.301–298.461)	1.151_x000D_ (0.51–2.411)	899.137	893.103	-1732.16	0.000238309	16.5092	0.0825459	0.954769	1.13729	1.41467	0.308627	0.383899	1.33328	36.2647	0.672689	0.553 / 0.653 / 0.768	0.387013	45.6459	no	nbinomial
model_30m_f_IBP_num_sqrt_PC2_sqrt_PC9	1.45_x000D_ (1.166–1.726)	0.155_x000D_ (0.03–0.28)	-	0.195_x000D_ (0.083–0.308)	-	-	-	0.093_x000D_ (-0.022–0.209)	129.504_x000D_ (39.722–295.151)	1.146_x000D_ (0.508–2.395)	900.026	895.19	-1715.4	0.000924969	15.5744	0.0778722	0.947223	1.19439	1.49567	0.324122	0.40588	1.93688	52.328	0.521166	0.405 / 0.476 / 0.593	0.133983	50.2129	no	nbinomial
model_30m_f_IBP_num_sqrt_PC3_sqrt_PC5	1.428_x000D_ (1.127–1.723)	0.144_x000D_ (0.011–0.278)	-	-	0.024_x000D_ (-0.111–0.158)	-0.089_x000D_ (-0.225–0.048)	-	-	127.289_x000D_ (39.403–285.165)	1.211_x000D_ (0.547–2.522)	906.69	900.318	-1896.02	0.000669844	21.9247	0.109624	0.966066	1.15816	1.45158	0.31429	0.393916	1.18856	14.2324	0.597495	0.463 / 0.571 / 0.689	0.232005	43.6605	no	nbinomial
model_30m_f_IBP_num_sqrt_PC3_sqrt_PC7	1.451_x000D_ (1.16–1.736)	0.153_x000D_ (0.024–0.282)	-	-	0.045_x000D_ (-0.078–0.167)	-	-0.137_x000D_ (-0.251–-0.023)	-	128.961_x000D_ (39.359–301.663)	1.187_x000D_ (0.506–2.506)	905.426	900.427	-1823.62	0.00119376	18.6121	0.0930607	0.95533	1.20099	1.49629	0.325914	0.406048	0.846764	12.6071	0.57795	0.465 / 0.56 / 0.659	0.178569	38.3443	no	nbinomial
model_30m_f_IBP_num_sqrt_PC3_sqrt_PC9	1.423_x000D_ (1.113–1.726)	0.141_x000D_ (0.003–0.279)	-	-	0.053_x000D_ (-0.072–0.178)	-	-	0.061_x000D_ (-0.056–0.18)	133.39_x000D_ (40.172–308.624)	1.185_x000D_ (0.523–2.481)	908.378	901.675	-1938.01	0.000532224	20.1976	0.100988	0.965366	1.1738	1.47013	0.318535	0.398949	1.9696	18.2543	0.519364	0.417 / 0.484 / 0.577	0.093174	32.5356	no	nbinomial
model_30m_f_IBP_num_sqrt_PC5_sqrt_PC7	1.4_x000D_ (1.111–1.682)	0.131_x000D_ (0.004–0.259)	-	-	-	-0.105_x000D_ (-0.229–0.019)	-0.145_x000D_ (-0.258–-0.032)	-	129.858_x000D_ (38.984–301.493)	1.187_x000D_ (0.519–2.5)	902.432	895.748	-1782.55	0.00041253	22.352	0.11176	0.958946	1.14845	1.42249	0.311655	0.386022	0.471473	7.5062	0.560245	0.458 / 0.536 / 0.624	0.12333	45.4127	no	nbinomial
model_30m_f_IBP_num_sqrt_PC5_sqrt_PC9	1.41_x000D_ (1.107–1.706)	0.135_x000D_ (0.002–0.269)	-	-	-	-0.088_x000D_ (-0.217–0.04)	-	0.05_x000D_ (-0.069–0.169)	129.258_x000D_ (38.461–301.091)	1.215_x000D_ (0.526–2.578)	906.483	900.306	-1899.95	0.000731407	19.8683	0.0993415	0.964681	1.16713	1.46351	0.316725	0.397154	1.05103	9.98854	0.498524	0.4 / 0.46 / 0.545	0.0777859	34.2152	no	nbinomial
model_30m_f_IBP_num_sqrt_PC7_sqrt_PC9	1.423_x000D_ (1.131–1.708)	0.143_x000D_ (0.015–0.272)	-	-	-	-	-0.143_x000D_ (-0.258–-0.029)	0.07_x000D_ (-0.047–0.187)	135.206_x000D_ (35.275–328.327)	1.177_x000D_ (0.492–2.605)	902.591	896.269	-1830.85	0.000196351	13.3133	0.0665664	0.96158	1.14225	1.41088	0.309973	0.38287	0.72477	7.83054	0.531149	0.441 / 0.506 / 0.582	0.0795333	54.3209	no	nbinomial
model_30m_f_IBP_num_sqrt_precip_sqrt_PC2_sqrt_PC3	1.341_x000D_ (1.027–1.649)	0.099_x000D_ (-0.042–0.24)	-0.08_x000D_ (-0.205–0.045)	0.211_x000D_ (0.097–0.327)	0.129_x000D_ (0.003–0.255)	-	-	-	126.413_x000D_ (36.336–297.537)	1.164_x000D_ (0.49–2.528)	902.323	898.698	-1823.98	0.000454999	7.81087	0.0390544	0.935955	1.23172	1.55313	0.334253	0.421474	1.98598e+06	6.10702e+08	536.096	514.332 / 540.619 / 554.035	1	58.1026	no	nbinomial
model_30m_f_IBP_num_sqrt_precip_sqrt_PC2_sqrt_PC5	1.357_x000D_ (1.042–1.668)	0.113_x000D_ (-0.03–0.256)	-0.089_x000D_ (-0.216–0.039)	0.17_x000D_ (0.059–0.283)	-	-0.098_x000D_ (-0.225–0.029)	-	-	128.683_x000D_ (41.482–284.074)	1.127_x000D_ (0.521–2.287)	897.998	893.007	-1616.26	0.000460243	10.8618	0.054309	0.953118	1.13224	1.41192	0.307257	0.383152	914334	2.3815e+08	606.706	582.057 / 611.512 / 626.817	1	37.3829	no	nbinomial
model_30m_f_IBP_num_sqrt_precip_sqrt_PC2_sqrt_PC7	1.446_x000D_ (1.155–1.732)	0.15_x000D_ (0.02–0.281)	-0.067_x000D_ (-0.192–0.058)	0.149_x000D_ (0.028–0.271)	-	-	-0.074_x000D_ (-0.197–0.05)	-	135.393_x000D_ (43.436–302.998)	1.096_x000D_ (0.505–2.221)	904.622	899.066	-1758.56	0.00142388	15.7191	0.0785956	0.94219	1.2162	1.52594	0.33004	0.414094	5.16862e+06	1.307e+09	541.515	519.616 / 546.131 / 559.495	1	39.1159	no	nbinomial
model_30m_f_IBP_num_sqrt_precip_sqrt_PC2_sqrt_PC9	1.398_x000D_ (1.095–1.696)	0.126_x000D_ (-0.009–0.262)	-0.065_x000D_ (-0.19–0.06)	0.192_x000D_ (0.08–0.305)	-	-	-	0.089_x000D_ (-0.026–0.205)	140.85_x000D_ (47.996–313.97)	1.066_x000D_ (0.506–2.113)	903.108	899.568	-1894.96	0.000499043	9.95306	0.0497653	0.937835	1.2424	1.56138	0.33715	0.423713	9.57485e+06	2.52988e+09	565.195	541.963 / 570.021 / 584.216	1	39.5893	no	nbinomial
model_30m_f_IBP_num_sqrt_precip_sqrt_PC3_sqrt_PC5	1.321_x000D_ (0.989–1.647)	0.09_x000D_ (-0.059–0.241)	-0.101_x000D_ (-0.23–0.029)	-	0.025_x000D_ (-0.109–0.158)	-0.108_x000D_ (-0.246–0.03)	-	-	130.031_x000D_ (38.515–304.8)	1.198_x000D_ (0.514–2.547)	908.952	902.539	-1886.06	0.000914288	19.4204	0.0971018	0.960247	1.17884	1.48095	0.319902	0.401887	468049	3.34391e+07	570.738	548.996 / 574.915 / 588.999	1	38.3664	no	nbinomial
model_30m_f_IBP_num_sqrt_precip_sqrt_PC3_sqrt_PC7	1.378_x000D_ (1.062–1.69)	0.116_x000D_ (-0.026–0.26)	-0.073_x000D_ (-0.199–0.054)	-	0.051_x000D_ (-0.072–0.174)	-	-0.132_x000D_ (-0.246–-0.019)	-	133.683_x000D_ (40.638–309.357)	1.144_x000D_ (0.502–2.389)	907.679	902.139	-1841.8	0.00114109	17.9724	0.0898618	0.952487	1.21409	1.50789	0.329469	0.409196	2.65851e+06	2.88095e+08	540.833	519.376 / 545.175 / 558.319	1	44.214	no	nbinomial
model_30m_f_IBP_num_sqrt_precip_sqrt_PC3_sqrt_PC9	1.355_x000D_ (1.022–1.682)	0.103_x000D_ (-0.047–0.254)	-0.08_x000D_ (-0.208–0.049)	-	0.06_x000D_ (-0.065–0.185)	-	-	0.057_x000D_ (-0.06–0.175)	140.093_x000D_ (41.567–338.24)	1.155_x000D_ (0.491–2.458)	912.999	907.112	-2294.33	3.4829e-06	18.0406	0.0902029	0.956083	1.23512	1.55671	0.335176	0.422444	4.85144e+06	3.23729e+08	575.756	552.816 / 580.578 / 594.469	1	33.0841	no	nbinomial
model_30m_f_IBP_num_sqrt_precip_sqrt_PC5_sqrt_PC7	1.307_x000D_ (0.989–1.619)	0.083_x000D_ (-0.06–0.226)	-0.092_x000D_ (-0.219–0.036)	-	-	-0.122_x000D_ (-0.247–0.003)	-0.14_x000D_ (-0.253–-0.028)	-	131.462_x000D_ (40.825–294.868)	1.129_x000D_ (0.516–2.331)	905.471	899.629	-1766.9	0.000945683	17.0842	0.0854212	0.949687	1.20929	1.49661	0.328166	0.406136	277973	2.35037e+07	551.43	530.167 / 555.493 / 569.122	1	41.2083	no	nbinomial
model_30m_f_IBP_num_sqrt_precip_sqrt_PC5_sqrt_PC9	1.302_x000D_ (0.973–1.627)	0.086_x000D_ (-0.062–0.236)	-0.095_x000D_ (-0.226–0.036)	-	-	-0.108_x000D_ (-0.24–0.023)	-	0.042_x000D_ (-0.077–0.162)	131.406_x000D_ (40.221–297.92)	1.168_x000D_ (0.528–2.417)	902.914	896.718	-1725.47	0.000267975	10.2637	0.0513185	0.967135	1.10443	1.37317	0.29971	0.372637	1.00077e+06	6.2374e+07	645.769	619.862 / 650.81 / 667.183	1	38.6704	no	nbinomial
model_30m_f_IBP_num_sqrt_precip_sqrt_PC7_sqrt_PC9	1.368_x000D_ (1.056–1.673)	0.116_x000D_ (-0.024–0.255)	-0.064_x000D_ (-0.191–0.064)	-	-	-	-0.139_x000D_ (-0.254–-0.025)	0.066_x000D_ (-0.05–0.183)	140.686_x000D_ (39.773–338.568)	1.119_x000D_ (0.481–2.382)	903.913	897.722	-1753.74	0.000214409	13.8959	0.0694794	0.958739	1.15324	1.42212	0.312956	0.385922	8.36279e+06	8.40375e+08	596.867	572.149 / 602.027 / 617.112	1	38.1892	no	nbinomial
model_30m_f_IBP_num_sqrt_PC2_sqrt_PC3_sqrt_PC5	1.404_x000D_ (1.111–1.691)	0.132_x000D_ (0.002–0.262)	-	0.206_x000D_ (0.089–0.325)	0.108_x000D_ (-0.032–0.247)	-0.035_x000D_ (-0.172–0.102)	-	-	122.63_x000D_ (38.471–275.123)	1.188_x000D_ (0.529–2.488)	901.527	896.537	-1727.06	0.00172629	15.9355	0.0796774	0.942825	1.20573	1.51522	0.3272	0.411186	2.51413	67.0139	0.70906	0.576 / 0.706 / 0.823	0.512654	45.0633	no	nbinomial
model_30m_f_IBP_num_sqrt_PC2_sqrt_PC3_sqrt_PC7	1.413_x000D_ (1.127–1.694)	0.138_x000D_ (0.011–0.265)	-	0.188_x000D_ (0.059–0.319)	0.111_x000D_ (-0.018–0.24)	-	-0.052_x000D_ (-0.178–0.075)	-	125.162_x000D_ (40.546–288.202)	1.18_x000D_ (0.513–2.427)	900.075	894.453	-1746.5	0.000523076	18.3393	0.0916963	0.946816	1.17497	1.468	0.318853	0.398373	2.21522	60.6361	0.792502	0.669 / 0.798 / 0.909	0.697086	47.2363	no	nbinomial
model_30m_f_IBP_num_sqrt_PC2_sqrt_PC3_sqrt_PC9	1.341_x000D_ (1.039–1.636)	0.104_x000D_ (-0.03–0.239)	-	0.225_x000D_ (0.11–0.342)	0.121_x000D_ (-0.005–0.247)	-	-	0.091_x000D_ (-0.024–0.205)	124.147_x000D_ (39.93–270.087)	1.156_x000D_ (0.54–2.362)	898.213	892.009	-1712	0.000390659	21.114	0.10557	0.948665	1.16241	1.44147	0.315443	0.391173	2.74493	76.6947	0.613682	0.491 / 0.591 / 0.709	0.26543	45.3828	no	nbinomial
model_30m_f_IBP_num_sqrt_PC2_sqrt_PC5_sqrt_PC7	1.436_x000D_ (1.151–1.715)	0.147_x000D_ (0.021–0.274)	-	0.139_x000D_ (0.017–0.262)	-	-0.088_x000D_ (-0.212–0.036)	-0.085_x000D_ (-0.208–0.039)	-	125.564_x000D_ (41.754–274.331)	1.154_x000D_ (0.534–2.332)	901.309	896.379	-1725.48	0.00144598	16.9587	0.0847935	0.944976	1.1984	1.50088	0.325209	0.407295	0.754162	29.8612	0.702209	0.585 / 0.695 / 0.805	0.488755	38.0466	no	nbinomial
model_30m_f_IBP_num_sqrt_PC2_sqrt_PC5_sqrt_PC9	1.411_x000D_ (1.117–1.698)	0.135_x000D_ (0.006–0.266)	-	0.188_x000D_ (0.076–0.302)	-	-0.064_x000D_ (-0.19–0.063)	-	0.082_x000D_ (-0.036–0.2)	130.305_x000D_ (42.272–287.832)	1.145_x000D_ (0.534–2.344)	902.095	896.457	-1769.4	0.00103754	15.0973	0.0754863	0.945281	1.20331	1.50715	0.326542	0.408997	1.33372	47.8115	0.569788	0.443 / 0.538 / 0.662	0.195028	41.0187	no	nbinomial
model_30m_f_IBP_num_sqrt_PC2_sqrt_PC7_sqrt_PC9	1.428_x000D_ (1.142–1.706)	0.146_x000D_ (0.021–0.272)	-	0.164_x000D_ (0.04–0.289)	-	-	-0.074_x000D_ (-0.198–0.05)	0.091_x000D_ (-0.024–0.207)	130.694_x000D_ (39.151–298.633)	1.141_x000D_ (0.506–2.399)	899.645	893.598	-1758.24	0.000341865	19.8189	0.0990943	0.951166	1.15646	1.43568	0.31383	0.389602	1.39696	39.9827	0.673601	0.555 / 0.655 / 0.77	0.391748	39.6889	no	nbinomial
model_30m_f_IBP_num_sqrt_PC3_sqrt_PC5_sqrt_PC7	1.398_x000D_ (1.099–1.689)	0.13_x000D_ (-0.002–0.263)	-	-	0.005_x000D_ (-0.128–0.138)	-0.103_x000D_ (-0.238–0.032)	-0.144_x000D_ (-0.259–-0.03)	-	128.449_x000D_ (39.75–286.414)	1.173_x000D_ (0.535–2.432)	903.232	897.631	-1810.64	0.000608823	21.8515	0.109257	0.957442	1.16275	1.4429	0.315536	0.39156	0.543432	9.25451	0.668745	0.528 / 0.665 / 0.785	0.423088	43.8633	no	nbinomial
model_30m_f_IBP_num_sqrt_PC3_sqrt_PC5_sqrt_PC9	1.394_x000D_ (1.08–1.7)	0.128_x000D_ (-0.011–0.268)	-	-	0.024_x000D_ (-0.111–0.159)	-0.079_x000D_ (-0.218–0.06)	-	0.05_x000D_ (-0.069–0.17)	129.561_x000D_ (39.338–297.728)	1.213_x000D_ (0.535–2.543)	907.814	900.805	-1929.94	0.000448566	22.5461	0.11273	0.965697	1.15454	1.44587	0.313309	0.392366	1.31519	14.6377	0.606809	0.469 / 0.581 / 0.701	0.251451	49.2119	no	nbinomial
model_30m_f_IBP_num_sqrt_PC3_sqrt_PC7_sqrt_PC9	1.396_x000D_ (1.09–1.695)	0.128_x000D_ (-0.008–0.264)	-	-	0.04_x000D_ (-0.083–0.163)	-	-0.14_x000D_ (-0.254–-0.026)	0.067_x000D_ (-0.049–0.184)	130.74_x000D_ (44.945–286.269)	1.147_x000D_ (0.531–2.289)	903.891	898.778	-1823.43	0.000786113	19.3829	0.0969145	0.956853	1.1758	1.4574	0.319078	0.395494	0.860447	12.5843	0.586303	0.471 / 0.567 / 0.668	0.192887	38.9824	no	nbinomial
model_30m_f_IBP_num_sqrt_PC5_sqrt_PC7_sqrt_PC9	1.378_x000D_ (1.075–1.672)	0.113_x000D_ (-0.02–0.247)	-	-	-	-0.094_x000D_ (-0.221–0.033)	-0.146_x000D_ (-0.26–-0.032)	0.053_x000D_ (-0.064–0.172)	128.596_x000D_ (34.461–297.807)	1.18_x000D_ (0.512–2.623)	905.301	902.195	-2003.71	0.000342237	5.22421	0.0261211	0.950815	1.21808	1.51384	0.330551	0.410811	0.54314	7.39405	0.554208	0.455 / 0.533 / 0.619	0.116059	45.0201	no	nbinomial
model_30m_f_IBP_num_sqrt_precip_sqrt_PC2_sqrt_PC3_sqrt_PC5	1.328_x000D_ (1.004–1.649)	0.083_x000D_ (-0.063–0.23)	-0.092_x000D_ (-0.219–0.036)	0.202_x000D_ (0.084–0.32)	0.108_x000D_ (-0.031–0.247)	-0.053_x000D_ (-0.192–0.086)	-	-	126.954_x000D_ (30.424–322.082)	1.181_x000D_ (0.449–2.828)	908.748	908.891	-1532.01	0.00240752	0.400952	0.00200476	0.898573	1.39534	1.78657	0.378654	0.484823	802384	2.45237e+08	617.501	592.322 / 622.394 / 638.226	1	42.6078	no	nbinomial
model_30m_f_IBP_num_sqrt_precip_sqrt_PC2_sqrt_PC3_sqrt_PC7	1.371_x000D_ (1.053–1.686)	0.097_x000D_ (-0.046–0.24)	-0.081_x000D_ (-0.208–0.046)	0.191_x000D_ (0.06–0.324)	0.121_x000D_ (-0.01–0.253)	-	-0.047_x000D_ (-0.175–0.082)	-	125.047_x000D_ (37.006–295.899)	1.207_x000D_ (0.477–2.843)	920.584	914.342	-1676.78	0.00222544	4.89417	0.0244708	0.861011	1.51853	1.95093	0.412084	0.529424	2.33066e+06	7.01853e+08	573.337	550.162 / 577.992 / 592.181	1	43.4001	no	nbinomial
model_30m_f_IBP_num_sqrt_precip_sqrt_PC2_sqrt_PC3_sqrt_PC9	1.281_x000D_ (0.956–1.6)	0.07_x000D_ (-0.076–0.216)	-0.074_x000D_ (-0.199–0.051)	0.223_x000D_ (0.108–0.34)	0.127_x000D_ (0.001–0.253)	-	-	0.086_x000D_ (-0.029–0.201)	127.056_x000D_ (37.432–294.065)	1.132_x000D_ (0.492–2.421)	901.401	899.165	-1827.46	0.000389944	4.69443	0.0234722	0.931114	1.25451	1.57475	0.340436	0.427339	3.86516e+06	1.28656e+09	541.624	519.399 / 546.214 / 559.857	1	45.4461	no	nbinomial
model_30m_f_IBP_num_sqrt_precip_sqrt_PC2_sqrt_PC5_sqrt_PC7	1.347_x000D_ (1.031–1.657)	0.101_x000D_ (-0.041–0.244)	-0.087_x000D_ (-0.213–0.04)	0.135_x000D_ (0.014–0.258)	-	-0.104_x000D_ (-0.23–0.022)	-0.082_x000D_ (-0.205–0.042)	-	130.082_x000D_ (38.349–304.963)	1.144_x000D_ (0.49–2.443)	903.855	899.379	-1750.99	0.0011602	15.6266	0.0781331	0.939674	1.22135	1.52456	0.331437	0.413721	607669	1.52969e+08	554.187	532.568 / 558.375 / 571.992	1	44.8031	no	nbinomial
model_30m_f_IBP_num_sqrt_precip_sqrt_PC2_sqrt_PC5_sqrt_PC9	1.331_x000D_ (1.01–1.648)	0.094_x000D_ (-0.05–0.24)	-0.082_x000D_ (-0.209–0.046)	0.183_x000D_ (0.07–0.296)	-	-0.081_x000D_ (-0.21–0.048)	-	0.074_x000D_ (-0.044–0.192)	137.253_x000D_ (43.073–318.432)	1.1_x000D_ (0.496–2.28)	902.971	899.983	-1865.35	0.000355898	6.68052	0.0334026	0.936676	1.24153	1.55757	0.336915	0.42268	2.84427e+06	6.76893e+08	580.471	557.593 / 585.072 / 599.021	1	41.6624	no	nbinomial
model_30m_f_IBP_num_sqrt_precip_sqrt_PC2_sqrt_PC7_sqrt_PC9	1.377_x000D_ (1.07–1.678)	0.12_x000D_ (-0.017–0.258)	-0.061_x000D_ (-0.187–0.065)	0.163_x000D_ (0.039–0.287)	-	-	-0.071_x000D_ (-0.195–0.053)	0.088_x000D_ (-0.028–0.204)	137.321_x000D_ (39.358–333.629)	1.124_x000D_ (0.47–2.402)	903.166	897.074	-1808.13	0.000364001	13.6689	0.0683447	0.945739	1.18384	1.47282	0.32126	0.39968	1.49485e+07	4.39069e+09	558.878	536.076 / 563.614 / 577.577	1	56.9856	no	nbinomial
model_30m_f_IBP_num_sqrt_precip_sqrt_PC3_sqrt_PC5_sqrt_PC7	1.337_x000D_ (1.005–1.666)	0.078_x000D_ (-0.072–0.228)	-0.098_x000D_ (-0.228–0.032)	-	0.009_x000D_ (-0.125–0.142)	-0.12_x000D_ (-0.258–0.018)	-0.14_x000D_ (-0.256–-0.024)	-	143.318_x000D_ (39.947–377.877)	1.174_x000D_ (0.45–2.712)	924.165	918.22	-1258.18	0.00928412	3.60809	0.0180404	0.875327	1.53615	1.95479	0.416865	0.530471	285926	2.21815e+07	605.219	581.561 / 609.626 / 624.854	1	40.7252	no	nbinomial
model_30m_f_IBP_num_sqrt_precip_sqrt_PC3_sqrt_PC5_sqrt_PC9	1.291_x000D_ (0.95–1.625)	0.079_x000D_ (-0.074–0.234)	-0.096_x000D_ (-0.227–0.035)	-	0.025_x000D_ (-0.11–0.159)	-0.098_x000D_ (-0.24–0.043)	-	0.042_x000D_ (-0.077–0.162)	132.493_x000D_ (45.434–286.645)	1.141_x000D_ (0.551–2.229)	905.986	900.042	-1855.31	0.000264445	14.8557	0.0742787	0.964885	1.12936	1.40936	0.306474	0.382458	1.2835e+06	8.37463e+07	604.826	581.413 / 609.452 / 624.435	1	41.8741	no	nbinomial
model_30m_f_IBP_num_sqrt_precip_sqrt_PC3_sqrt_PC7_sqrt_PC9	1.327_x000D_ (0.997–1.65)	0.095_x000D_ (-0.053–0.244)	-0.068_x000D_ (-0.195–0.06)	-	0.046_x000D_ (-0.078–0.17)	-	-0.135_x000D_ (-0.25–-0.021)	0.063_x000D_ (-0.053–0.18)	138.137_x000D_ (40.659–307.555)	1.109_x000D_ (0.522–2.297)	906.041	899.392	-1860.68	0.000315404	22.1595	0.110797	0.956902	1.17034	1.44364	0.317594	0.391761	5.88391e+06	5.85376e+08	543.419	521.884 / 547.77 / 560.991	1	41.5725	no	nbinomial
model_30m_f_IBP_num_sqrt_precip_sqrt_PC5_sqrt_PC7_sqrt_PC9	1.278_x000D_ (0.95–1.599)	0.071_x000D_ (-0.076–0.218)	-0.087_x000D_ (-0.216–0.042)	-	-	-0.112_x000D_ (-0.241–0.017)	-0.142_x000D_ (-0.255–-0.029)	0.046_x000D_ (-0.072–0.164)	133.407_x000D_ (36.461–319.797)	1.163_x000D_ (0.49–2.541)	906.33	899.368	-1809.41	0.00055253	18.117	0.0905851	0.952385	1.1834	1.46013	0.32114	0.396236	946305	7.59991e+07	569.659	547.62 / 573.897 / 587.921	1	47.9427	no	nbinomial
model_30m_f_IBP_num_sqrt_PC2_sqrt_PC3_sqrt_PC5_sqrt_PC7	1.385_x000D_ (1.093–1.672)	0.128_x000D_ (-0.002–0.259)	-	0.174_x000D_ (0.038–0.311)	0.087_x000D_ (-0.059–0.233)	-0.05_x000D_ (-0.19–0.09)	-0.062_x000D_ (-0.191–0.069)	-	124.444_x000D_ (40.026–274.398)	1.169_x000D_ (0.528–2.412)	896.471	891.239	-1657.44	0.000259573	6.5716	0.032858	0.955199	1.11055	1.37709	0.301371	0.373701	1.70645	49.8917	0.97858	0.834 / 0.994 / 1.137	0.859309	42.737	no	nbinomial
model_30m_f_IBP_num_sqrt_PC2_sqrt_PC3_sqrt_PC5_sqrt_PC9	1.344_x000D_ (1.039–1.641)	0.103_x000D_ (-0.032–0.238)	-	0.223_x000D_ (0.103–0.343)	0.115_x000D_ (-0.024–0.255)	-0.014_x000D_ (-0.154–0.126)	-	0.088_x000D_ (-0.029–0.206)	124.101_x000D_ (39.087–279.459)	1.172_x000D_ (0.523–2.443)	901.588	896.358	-1730.13	0.00129247	15.4516	0.077258	0.940747	1.21531	1.51607	0.329798	0.411416	2.78652	75.5515	0.723558	0.591 / 0.723 / 0.841	0.547714	43.6205	no	nbinomial
model_30m_f_IBP_num_sqrt_PC2_sqrt_PC3_sqrt_PC7_sqrt_PC9	1.346_x000D_ (1.043–1.641)	0.104_x000D_ (-0.03–0.238)	-	0.202_x000D_ (0.072–0.333)	0.11_x000D_ (-0.02–0.239)	-	-0.05_x000D_ (-0.176–0.077)	0.089_x000D_ (-0.025–0.204)	126.374_x000D_ (39.213–287.014)	1.158_x000D_ (0.515–2.423)	901.353	896	-1721.33	0.00122906	14.6087	0.0730434	0.941084	1.20719	1.50436	0.327597	0.408238	2.33581	62.1782	0.79389	0.669 / 0.8 / 0.913	0.699791	41.907	no	nbinomial
model_30m_f_IBP_num_sqrt_PC2_sqrt_PC5_sqrt_PC7_sqrt_PC9	1.375_x000D_ (1.079–1.665)	0.123_x000D_ (-0.008–0.255)	-	0.153_x000D_ (0.029–0.279)	-	-0.072_x000D_ (-0.199–0.056)	-0.081_x000D_ (-0.205–0.043)	0.078_x000D_ (-0.039–0.196)	128.545_x000D_ (38.15–286.174)	1.16_x000D_ (0.532–2.437)	898.747	891.446	-1736.48	0.000425187	27.4289	0.137145	0.955339	1.1175	1.3804	0.303256	0.3746	0.870083	35.4951	0.733776	0.612 / 0.726 / 0.84	0.562088	54.3358	no	nbinomial
model_30m_f_IBP_num_sqrt_PC3_sqrt_PC5_sqrt_PC7_sqrt_PC9	1.362_x000D_ (1.049–1.667)	0.113_x000D_ (-0.026–0.252)	-	-	0.006_x000D_ (-0.129–0.139)	-0.092_x000D_ (-0.23–0.045)	-0.146_x000D_ (-0.261–-0.031)	0.054_x000D_ (-0.064–0.173)	129.327_x000D_ (37.207–299.88)	1.175_x000D_ (0.511–2.523)	904.739	899.653	-1935.72	0.000288989	8.64138	0.0432069	0.955717	1.17401	1.45496	0.318591	0.394832	0.60243	9.40895	0.679912	0.535 / 0.677 / 0.8	0.450482	48.506	no	nbinomial
model_30m_f_IBP_num_sqrt_precip_sqrt_PC2_sqrt_PC3_sqrt_PC5_sqrt_PC7	1.303_x000D_ (0.98–1.621)	0.082_x000D_ (-0.064–0.228)	-0.087_x000D_ (-0.213–0.04)	0.171_x000D_ (0.036–0.307)	0.087_x000D_ (-0.059–0.232)	-0.066_x000D_ (-0.207–0.076)	-0.059_x000D_ (-0.188–0.07)	-	127.832_x000D_ (40.145–283.545)	1.122_x000D_ (0.515–2.323)	903.583	899.493	-1773.93	0.00101001	11.7622	0.058811	0.937378	1.21827	1.52922	0.330604	0.414986	1.17322e+06	3.36567e+08	547.81	526.709 / 552.002 / 565.531	1	60.9635	no	nbinomial
model_30m_f_IBP_num_sqrt_precip_sqrt_PC2_sqrt_PC3_sqrt_PC5_sqrt_PC9	1.263_x000D_ (0.933–1.587)	0.064_x000D_ (-0.085–0.213)	-0.079_x000D_ (-0.206–0.048)	0.216_x000D_ (0.097–0.337)	0.114_x000D_ (-0.026–0.253)	-0.031_x000D_ (-0.173–0.111)	-	0.08_x000D_ (-0.037–0.198)	126.559_x000D_ (39.326–285.074)	1.146_x000D_ (0.513–2.39)	902.87	897.436	-1716.5	0.00123689	14.982	0.0749101	0.939085	1.20825	1.50936	0.327882	0.409594	4.60777e+06	2.012e+09	550.827	529.702 / 555.111 / 568.49	1	64.5494	no	nbinomial
model_30m_f_IBP_num_sqrt_precip_sqrt_PC2_sqrt_PC3_sqrt_PC7_sqrt_PC9	1.276_x000D_ (0.953–1.593)	0.07_x000D_ (-0.075–0.217)	-0.071_x000D_ (-0.195–0.054)	0.202_x000D_ (0.072–0.333)	0.116_x000D_ (-0.014–0.245)	-	-0.045_x000D_ (-0.171–0.081)	0.085_x000D_ (-0.029–0.2)	128.482_x000D_ (40.446–276.79)	1.116_x000D_ (0.53–2.294)	902.618	896.595	-1712.89	0.00103473	16.6389	0.0831947	0.940464	1.19838	1.49381	0.325204	0.405377	5.10309e+06	1.51902e+09	526.022	504.778 / 530.373 / 543.366	1	47.8144	no	nbinomial
model_30m_f_IBP_num_sqrt_precip_sqrt_PC2_sqrt_PC5_sqrt_PC7_sqrt_PC9	1.3_x000D_ (0.977–1.617)	0.084_x000D_ (-0.061–0.231)	-0.079_x000D_ (-0.206–0.049)	0.149_x000D_ (0.025–0.274)	-	-0.088_x000D_ (-0.217–0.041)	-0.079_x000D_ (-0.202–0.045)	0.07_x000D_ (-0.047–0.189)	131.255_x000D_ (39.532–301.21)	1.137_x000D_ (0.502–2.385)	902.353	894.841	-1767.6	0.000332555	22.754	0.11377	0.949242	1.15266	1.42308	0.312799	0.386181	2.46844e+06	6.69361e+08	567.214	544.869 / 571.671 / 585.509	1	55.4036	no	nbinomial
model_30m_f_IBP_num_sqrt_precip_sqrt_PC3_sqrt_PC5_sqrt_PC7_sqrt_PC9	1.272_x000D_ (0.935–1.603)	0.069_x000D_ (-0.083–0.222)	-0.087_x000D_ (-0.216–0.043)	-	0.007_x000D_ (-0.127–0.14)	-0.109_x000D_ (-0.249–0.03)	-0.141_x000D_ (-0.256–-0.027)	0.046_x000D_ (-0.072–0.164)	134.202_x000D_ (38.727–316.927)	1.153_x000D_ (0.497–2.458)	906.884	899.726	-1828.03	0.000468581	20.8597	0.104299	0.954201	1.1677	1.43922	0.316879	0.390562	1.0802e+06	9.33159e+07	574.526	552.391 / 578.826 / 593.072	1	39.5323	no	nbinomial
model_30m_f_IBP_num_sqrt_PC2_sqrt_PC3_sqrt_PC5_sqrt_PC7_sqrt_PC9	1.333_x000D_ (1.026–1.633)	0.1_x000D_ (-0.036–0.237)	-	0.194_x000D_ (0.055–0.333)	0.096_x000D_ (-0.051–0.244)	-0.027_x000D_ (-0.171–0.116)	-0.055_x000D_ (-0.185–0.075)	0.085_x000D_ (-0.033–0.203)	125.633_x000D_ (38.841–282.592)	1.164_x000D_ (0.523–2.428)	901.621	895.487	-1754.53	0.00060682	17.5673	0.0878367	0.946331	1.17318	1.4567	0.318366	0.395305	2.26209	58.3704	0.997353	0.847 / 1.015 / 1.166	0.86348	41.5582	no	nbinomial
model_30m_f_IBP_num_sqrt_precip_sqrt_PC2_sqrt_PC3_sqrt_PC5_sqrt_PC7_sqrt_PC9	1.259_x000D_ (0.925–1.586)	0.062_x000D_ (-0.088–0.213)	-0.078_x000D_ (-0.206–0.051)	0.189_x000D_ (0.05–0.329)	0.095_x000D_ (-0.052–0.243)	-0.044_x000D_ (-0.19–0.103)	-0.053_x000D_ (-0.183–0.077)	0.077_x000D_ (-0.041–0.196)	128.641_x000D_ (36.014–310.245)	1.163_x000D_ (0.479–2.542)	904.394	899.189	-1858.48	0.000304264	7.42406	0.0371203	0.939083	1.20282	1.5013	0.32641	0.407409	6.44046e+06	2.32696e+09	569.57	547.652 / 574.03 / 587.931	1	47.3268	no	nbinomial

## Sheet: Table_S10_females_50m
Model	Intercept	IBP_num	sqrt_precip	sqrt_PC2	sqrt_PC3	sqrt_PC5	sqrt_PC9	Range	Stdev	DIC	WAIC	LPML	CPO_median	cpo_failures	cpo_failure_rate	correlation	MAE	RMSE	MAE_rel	RMSE_rel	min_pred	max_pred	CV_mean	CV_q25_q50_q75	CV_high_prop	Time	non_zero_CrI	model_family
model_50m_f_	1.126_x000D_ (0.993–1.252)	-	-	-	-	-	-	158.139_x000D_ (54.965–337.565)	1.037_x000D_ (0.539–1.911)	905.74	898.08	-1932.01	0.000177696	23.154	0.11577	0.989601	1.08483	1.32877	0.29439	0.360589	1.72659	10.006	0.480174	0.403 / 0.45 / 0.516	0.0542247	42.4905	yes	nbinomial
model_50m_f_IBP_num	1.516_x000D_ (1.243–1.781)	0.187_x000D_ (0.068–0.307)	-	-	-	-	-	132.702_x000D_ (43.054–291.32)	1.163_x000D_ (0.544–2.347)	904.986	897.658	-1846.23	0.000274584	25.6107	0.128053	0.970676	1.13261	1.41372	0.307356	0.383642	1.69841	11.1785	0.456517	0.377 / 0.422 / 0.486	0.050279	45.7838	yes	nbinomial
model_50m_f_sqrt_precip	1.14_x000D_ (1.004–1.265)	-	-0.141_x000D_ (-0.257–-0.025)	-	-	-	-	159.191_x000D_ (53.579–354.042)	1.01_x000D_ (0.497–1.912)	910.996	904.323	-1945.62	0.000497371	21.1777	0.105888	0.974738	1.19403	1.47733	0.324025	0.400904	97.0721	1774.79	504.21	479.51 / 509.047 / 524.045	1	42.3284	yes	nbinomial
model_50m_f_sqrt_PC2	1.127_x000D_ (0.996–1.251)	-	-	0.169_x000D_ (0.055–0.284)	-	-	-	140.243_x000D_ (54.586–283.351)	1.08_x000D_ (0.567–1.957)	902.155	895.348	-1899.9	0.000243487	24.8862	0.124431	0.977591	1.09727	1.36612	0.297767	0.370725	2.39716	28.0162	0.553619	0.44 / 0.512 / 0.621	0.151457	38.3123	yes	nbinomial
model_50m_f_sqrt_PC3	1.14_x000D_ (1.003–1.266)	-	-	-	0.132_x000D_ (0.015–0.248)	-	-	145.399_x000D_ (43.785–323.293)	1.096_x000D_ (0.529–2.215)	911.204	905.069	-2103.57	0.000125247	16.3909	0.0819544	0.977566	1.19784	1.48155	0.325059	0.402048	2.49199	26.2249	0.506481	0.419 / 0.478 / 0.554	0.0649907	46.865	yes	nbinomial
model_50m_f_sqrt_PC5	1.126_x000D_ (0.998–1.248)	-	-	-	-	-0.204_x000D_ (-0.321–-0.088)	-	140.152_x000D_ (48.026–290.645)	1.072_x000D_ (0.549–2.055)	900.596	893.893	-1791.41	0.000238819	22.4341	0.112171	0.973123	1.09532	1.35663	0.297236	0.368149	0.51231	7.27336	0.491176	0.406 / 0.46 / 0.535	0.062116	44.3014	yes	nbinomial
model_50m_f_sqrt_PC9	1.126_x000D_ (0.994–1.251)	-	-	-	-	-	0.136_x000D_ (0.025–0.249)	143.472_x000D_ (45.997–322.959)	1.124_x000D_ (0.53–2.227)	904.448	896.698	-1898.28	0.000227092	21.9096	0.109548	0.981243	1.09149	1.35	0.296199	0.366349	1.86269	11.1129	0.473007	0.393 / 0.439 / 0.505	0.0541119	32.7938	yes	nbinomial
model_50m_f_IBP_num_sqrt_precip	1.446_x000D_ (1.148–1.737)	0.152_x000D_ (0.019–0.285)	-0.076_x000D_ (-0.203–0.052)	-	-	-	-	139.462_x000D_ (42.691–306.114)	1.116_x000D_ (0.534–2.271)	907.182	900.32	-1863.31	0.000341034	22.6983	0.113492	0.966366	1.16305	1.4547	0.315616	0.394762	5.4401e+06	3.95537e+08	560.732	538.366 / 565.549 / 579.084	1	50.8378	no	nbinomial
model_50m_f_IBP_num_sqrt_PC2	1.514_x000D_ (1.246–1.776)	0.187_x000D_ (0.07–0.305)	-	0.168_x000D_ (0.057–0.28)	-	-	-	123.978_x000D_ (39.135–283.278)	1.208_x000D_ (0.532–2.514)	897.818	893.039	-1636.1	0.000329706	8.19731	0.0409866	0.957787	1.13002	1.43031	0.306655	0.388144	2.47808	39.9297	0.532449	0.42 / 0.489 / 0.595	0.125867	34.5702	yes	nbinomial
model_50m_f_IBP_num_sqrt_PC3	1.453_x000D_ (1.156–1.744)	0.157_x000D_ (0.025–0.29)	-	-	0.066_x000D_ (-0.062–0.194)	-	-	132.614_x000D_ (40.321–297.807)	1.182_x000D_ (0.544–2.443)	907.424	898.571	-1865.92	0.000241302	25.1537	0.125768	0.96999	1.12749	1.40184	0.305967	0.380417	2.10445	17.8764	0.527087	0.431 / 0.495 / 0.58	0.0866355	45.2613	no	nbinomial
model_50m_f_IBP_num_sqrt_PC5	1.402_x000D_ (1.115–1.682)	0.128_x000D_ (0.002–0.254)	-	-	-	-0.159_x000D_ (-0.283–-0.036)	-	129.189_x000D_ (36.624–308.079)	1.193_x000D_ (0.501–2.605)	905.899	900.609	-1888	0.000731411	12.8263	0.0641315	0.954153	1.21036	1.52801	0.328457	0.414656	0.746774	7.5062	0.471861	0.384 / 0.437 / 0.513	0.0570994	35.531	yes	nbinomial
model_50m_f_IBP_num_sqrt_PC9	1.454_x000D_ (1.162–1.737)	0.155_x000D_ (0.028–0.283)	-	-	-	-	0.087_x000D_ (-0.031–0.205)	130.78_x000D_ (35.142–309.421)	1.212_x000D_ (0.519–2.676)	907.072	901.279	-2018.14	0.000185287	6.92244	0.0346122	0.965022	1.17385	1.48071	0.318548	0.401822	1.86196	10.4473	0.453577	0.376 / 0.42 / 0.481	0.0472352	40.6159	no	nbinomial
model_50m_f_IBP_num_sqrt_precip_sqrt_PC2	1.451_x000D_ (1.159–1.738)	0.154_x000D_ (0.024–0.285)	-0.073_x000D_ (-0.198–0.053)	0.167_x000D_ (0.056–0.279)	-	-	-	126.915_x000D_ (40.044–303.793)	1.201_x000D_ (0.496–2.502)	902.71	897.095	-1768.13	0.00103306	17.046	0.0852298	0.950135	1.17025	1.48836	0.317572	0.403896	5.65967e+06	9.59738e+08	554.637	532.006 / 559.35 / 573.282	1	43.4682	no	nbinomial
model_50m_f_IBP_num_sqrt_precip_sqrt_PC3	1.387_x000D_ (1.067–1.702)	0.12_x000D_ (-0.024–0.266)	-0.078_x000D_ (-0.205–0.049)	-	0.069_x000D_ (-0.059–0.196)	-	-	137.234_x000D_ (42.956–305.666)	1.13_x000D_ (0.531–2.305)	910.628	904.306	-1962.56	0.000267956	18.8996	0.0944978	0.960255	1.20651	1.51618	0.327411	0.411447	4.64012e+06	3.29468e+08	554.238	532.187 / 558.803 / 572.538	1	44.2517	no	nbinomial
model_50m_f_IBP_num_sqrt_precip_sqrt_PC5	1.31_x000D_ (0.991–1.63)	0.066_x000D_ (-0.078–0.21)	-0.118_x000D_ (-0.248–0.011)	-	-	-0.184_x000D_ (-0.312–-0.057)	-	151.81_x000D_ (52.08–363.552)	1.189_x000D_ (0.515–2.685)	923.832	914.501	-585.405	0.100786	0	0	0.89321	1.47388	1.8967	0.399967	0.514707	29818.7	1.7678e+06	609.62	585.348 / 614.22 / 629.512	1	48.5273	no	nbinomial
model_50m_f_IBP_num_sqrt_precip_sqrt_PC9	1.383_x000D_ (1.073–1.687)	0.122_x000D_ (-0.016–0.262)	-0.073_x000D_ (-0.2–0.055)	-	-	-	0.085_x000D_ (-0.032–0.202)	133.817_x000D_ (42.331–291.548)	1.157_x000D_ (0.542–2.381)	906.734	899.567	-1884.21	0.000481012	23.0098	0.115049	0.965152	1.14577	1.43774	0.310927	0.390161	7.77096e+06	5.07916e+08	559.856	537.421 / 564.67 / 578.258	1	35.6962	no	nbinomial
model_50m_f_IBP_num_sqrt_PC2_sqrt_PC3	1.406_x000D_ (1.116–1.691)	0.129_x000D_ (0.001–0.259)	-	0.197_x000D_ (0.084–0.311)	0.128_x000D_ (-0.002–0.258)	-	-	114.426_x000D_ (37.184–245.658)	1.216_x000D_ (0.561–2.545)	900.577	897.717	-1787.76	0.00110162	9.02664	0.0451332	0.941325	1.2276	1.55219	0.333133	0.421219	2.87009	63.1804	0.600394	0.496 / 0.579 / 0.676	0.20354	47.4722	no	nbinomial
model_50m_f_IBP_num_sqrt_PC2_sqrt_PC5	1.417_x000D_ (1.136–1.691)	0.136_x000D_ (0.013–0.261)	-	0.15_x000D_ (0.04–0.261)	-	-0.137_x000D_ (-0.26–-0.013)	-	118.813_x000D_ (36.582–269.005)	1.226_x000D_ (0.535–2.617)	901.676	895.992	-1710.47	0.00219966	15.4603	0.0773015	0.943543	1.19538	1.52387	0.324389	0.413534	1.03104	26.9791	0.557203	0.444 / 0.526 / 0.632	0.149766	36.1201	yes	nbinomial
model_50m_f_IBP_num_sqrt_PC2_sqrt_PC9	1.421_x000D_ (1.139–1.696)	0.144_x000D_ (0.02–0.269)	-	0.187_x000D_ (0.075–0.3)	-	-	0.119_x000D_ (0.002–0.236)	115.361_x000D_ (35.675–263.301)	1.28_x000D_ (0.552–2.723)	895.866	889.997	-1681.28	0.000281386	16.8981	0.0844905	0.957199	1.11058	1.40083	0.301378	0.380144	2.52688	43.5656	0.538491	0.424 / 0.494 / 0.6	0.1297	51.4357	yes	nbinomial
model_50m_f_IBP_num_sqrt_PC3_sqrt_PC5	1.391_x000D_ (1.09–1.685)	0.124_x000D_ (-0.009–0.258)	-	-	0.011_x000D_ (-0.124–0.146)	-0.155_x000D_ (-0.288–-0.023)	-	130.397_x000D_ (37.827–307.999)	1.194_x000D_ (0.511–2.564)	905.528	899.896	-1977.29	0.000446688	18.5422	0.0927112	0.958247	1.17599	1.47816	0.319129	0.401128	0.830261	9.52973	0.588168	0.476 / 0.569 / 0.665	0.183755	34.1021	no	nbinomial
model_50m_f_IBP_num_sqrt_PC3_sqrt_PC9	1.404_x000D_ (1.095–1.705)	0.132_x000D_ (-0.005–0.27)	-	-	0.057_x000D_ (-0.072–0.185)	-	0.081_x000D_ (-0.036–0.199)	129.808_x000D_ (39.031–295.413)	1.202_x000D_ (0.538–2.525)	907.712	900.531	-1865.06	0.000660438	20.727	0.103635	0.96458	1.15913	1.45831	0.314555	0.395741	2.20747	17.3408	0.520462	0.425 / 0.489 / 0.573	0.0802097	36.0433	no	nbinomial
model_50m_f_IBP_num_sqrt_PC5_sqrt_PC9	1.359_x000D_ (1.064–1.648)	0.111_x000D_ (-0.019–0.242)	-	-	-	-0.146_x000D_ (-0.273–-0.019)	0.058_x000D_ (-0.061–0.177)	123.543_x000D_ (38.635–279.691)	1.223_x000D_ (0.527–2.61)	902.187	896.607	-1801.72	0.000259203	15.5011	0.0775053	0.96107	1.14298	1.43085	0.310171	0.38829	0.797763	8.29528	0.49544	0.403 / 0.459 / 0.538	0.0696128	35.8083	no	nbinomial
model_50m_f_IBP_num_sqrt_precip_sqrt_PC2_sqrt_PC3	1.332_x000D_ (1.016–1.643)	0.093_x000D_ (-0.049–0.236)	-0.076_x000D_ (-0.2–0.048)	0.196_x000D_ (0.083–0.31)	0.13_x000D_ (0–0.259)	-	-	117.828_x000D_ (38.788–257.331)	1.207_x000D_ (0.547–2.487)	902.571	895.791	-1722.34	0.000432549	22.0514	0.110257	0.951537	1.14212	1.43044	0.309939	0.388178	2.54243e+06	6.53958e+08	548.496	525.632 / 553.323 / 567.485	1	67.645	no	nbinomial
model_50m_f_IBP_num_sqrt_precip_sqrt_PC2_sqrt_PC5	1.308_x000D_ (0.997–1.615)	0.079_x000D_ (-0.06–0.22)	-0.107_x000D_ (-0.233–0.019)	0.145_x000D_ (0.036–0.255)	-	-0.159_x000D_ (-0.283–-0.034)	-	123.488_x000D_ (35.719–301.413)	1.185_x000D_ (0.472–2.62)	903.799	900.917	-1667.97	0.00297595	10.2152	0.051076	0.92695	1.25807	1.61807	0.341403	0.439096	57693.4	8.77883e+06	570.727	547.813 / 575.187 / 589.454	1	44.5478	no	nbinomial
model_50m_f_IBP_num_sqrt_precip_sqrt_PC2_sqrt_PC9	1.359_x000D_ (1.055–1.657)	0.114_x000D_ (-0.022–0.25)	-0.068_x000D_ (-0.193–0.058)	0.185_x000D_ (0.073–0.298)	-	-	0.116_x000D_ (-0.001–0.233)	117.527_x000D_ (36.631–260.821)	1.226_x000D_ (0.547–2.586)	896.741	891.887	-1650.05	0.000406217	11.07	0.0553498	0.954501	1.11731	1.41195	0.303204	0.383162	8.80924e+06	1.56751e+09	593.72	568.476 / 598.987 / 614.423	1	41.2077	no	nbinomial
model_50m_f_IBP_num_sqrt_precip_sqrt_PC3_sqrt_PC5	1.273_x000D_ (0.946–1.595)	0.066_x000D_ (-0.082–0.214)	-0.114_x000D_ (-0.241–0.015)	-	0.006_x000D_ (-0.129–0.14)	-0.179_x000D_ (-0.313–-0.046)	-	132.377_x000D_ (37.325–320.513)	1.169_x000D_ (0.481–2.541)	907.177	902.026	-1821.24	0.000992881	16.4424	0.0822118	0.94887	1.21082	1.52731	0.32858	0.414466	43382.2	2.95951e+06	568.28	546.699 / 572.696 / 587.007	1	62.3417	no	nbinomial
model_50m_f_IBP_num_sqrt_precip_sqrt_PC3_sqrt_PC9	1.335_x000D_ (1.004–1.66)	0.097_x000D_ (-0.052–0.247)	-0.075_x000D_ (-0.202–0.053)	-	0.059_x000D_ (-0.07–0.188)	-	0.079_x000D_ (-0.039–0.197)	132.125_x000D_ (38.784–307.766)	1.183_x000D_ (0.514–2.511)	908.271	902.401	-2083.81	0.000216926	20.1805	0.100903	0.961722	1.16538	1.46705	0.31625	0.398115	7.48017e+06	4.99684e+08	552.437	530.451 / 557.006 / 570.705	1	36.3765	no	nbinomial
model_50m_f_IBP_num_sqrt_precip_sqrt_PC5_sqrt_PC9	1.29_x000D_ (0.966–1.609)	0.055_x000D_ (-0.089–0.201)	-0.114_x000D_ (-0.243–0.014)	-	-	-0.172_x000D_ (-0.302–-0.043)	0.047_x000D_ (-0.071–0.165)	173.517_x000D_ (43.425–536.271)	1.153_x000D_ (0.421–2.679)	923.888	916.919	-887.008	0.0205889	1.33135	0.00665677	0.883475	1.4995	1.93777	0.40692	0.525852	53002.8	2.65422e+06	588.171	565.027 / 592.687 / 607.251	1	40.452	no	nbinomial
model_50m_f_IBP_num_sqrt_PC2_sqrt_PC3_sqrt_PC5	1.374_x000D_ (1.078–1.666)	0.111_x000D_ (-0.02–0.242)	-	0.173_x000D_ (0.056–0.291)	0.084_x000D_ (-0.058–0.226)	-0.105_x000D_ (-0.24–0.03)	-	115.25_x000D_ (32.469–274.143)	1.253_x000D_ (0.505–2.836)	902.764	902.295	-1633.83	0.00243786	2.04132	0.0102066	0.926385	1.28839	1.64527	0.34963	0.446477	1.52085	40.4965	0.711357	0.602 / 0.707 / 0.805	0.520997	38.9318	no	nbinomial
model_50m_f_IBP_num_sqrt_PC2_sqrt_PC3_sqrt_PC9	1.316_x000D_ (1.016–1.612)	0.093_x000D_ (-0.041–0.228)	-	0.213_x000D_ (0.099–0.328)	0.119_x000D_ (-0.011–0.249)	-	0.11_x000D_ (-0.005–0.226)	111.965_x000D_ (36.933–246.375)	1.266_x000D_ (0.571–2.607)	894.798	889.323	-1583.16	0.000536698	14.7003	0.0735015	0.953781	1.11484	1.39621	0.302535	0.378891	2.94473	70.4952	0.623691	0.515 / 0.598 / 0.698	0.246097	51.6736	no	nbinomial
model_50m_f_IBP_num_sqrt_PC2_sqrt_PC5_sqrt_PC9	1.36_x000D_ (1.069–1.644)	0.111_x000D_ (-0.016–0.24)	-	0.168_x000D_ (0.055–0.281)	-	-0.113_x000D_ (-0.24–0.014)	0.093_x000D_ (-0.026–0.212)	112.815_x000D_ (35.087–246.892)	1.259_x000D_ (0.569–2.685)	897.797	893.857	-1708.97	0.000690633	14.5124	0.0725619	0.945695	1.17565	1.48998	0.319037	0.404336	1.30166	32.4031	0.580114	0.464 / 0.549 / 0.657	0.181951	43.6996	no	nbinomial
model_50m_f_IBP_num_sqrt_PC3_sqrt_PC5_sqrt_PC9	1.349_x000D_ (1.04–1.652)	0.109_x000D_ (-0.029–0.247)	-	-	0.009_x000D_ (-0.127–0.144)	-0.143_x000D_ (-0.278–-0.008)	0.057_x000D_ (-0.061–0.177)	125.472_x000D_ (38.905–280.762)	1.201_x000D_ (0.537–2.519)	902.952	896.366	-1820.67	0.000299899	26.2497	0.131248	0.963511	1.1189	1.39642	0.303636	0.378948	0.891962	10.276	0.605294	0.491 / 0.587 / 0.683	0.216842	56.2783	no	nbinomial
model_50m_f_IBP_num_sqrt_precip_sqrt_PC2_sqrt_PC3_sqrt_PC5	1.257_x000D_ (0.933–1.575)	0.059_x000D_ (-0.086–0.205)	-0.101_x000D_ (-0.227–0.025)	0.167_x000D_ (0.05–0.284)	0.076_x000D_ (-0.065–0.217)	-0.127_x000D_ (-0.264–0.01)	-	119.848_x000D_ (38.005–269.593)	1.185_x000D_ (0.521–2.478)	901.14	895.611	-1687.12	0.000498917	18.1896	0.0909482	0.94435	1.15752	1.46509	0.314117	0.397582	229415	4.28151e+07	566.46	544.559 / 570.836 / 585.408	1	52.8284	no	nbinomial
model_50m_f_IBP_num_sqrt_precip_sqrt_PC2_sqrt_PC3_sqrt_PC9	1.249_x000D_ (0.927–1.567)	0.06_x000D_ (-0.085–0.207)	-0.072_x000D_ (-0.195–0.052)	0.212_x000D_ (0.098–0.326)	0.122_x000D_ (-0.009–0.251)	-	0.107_x000D_ (-0.008–0.223)	113.245_x000D_ (36.909–240.854)	1.231_x000D_ (0.576–2.541)	896.727	891.431	-1662.92	0.000350937	19.5787	0.0978937	0.95084	1.11857	1.40941	0.303545	0.382473	4.17416e+06	1.0697e+09	559.207	535.621 / 563.992 / 578.726	1	57.9309	no	nbinomial
model_50m_f_IBP_num_sqrt_precip_sqrt_PC2_sqrt_PC5_sqrt_PC9	1.259_x000D_ (0.942–1.57)	0.061_x000D_ (-0.08–0.204)	-0.098_x000D_ (-0.224–0.029)	0.162_x000D_ (0.05–0.274)	-	-0.135_x000D_ (-0.264–-0.006)	0.084_x000D_ (-0.035–0.203)	117.258_x000D_ (34.393–268.776)	1.23_x000D_ (0.525–2.684)	900.547	895.418	-1672.98	0.00111935	15.3414	0.0767068	0.940733	1.18244	1.49955	0.32088	0.406934	296557	4.53983e+07	548.912	527.326 / 553.279 / 566.504	1	41.4047	no	nbinomial
model_50m_f_IBP_num_sqrt_precip_sqrt_PC3_sqrt_PC5_sqrt_PC9	1.239_x000D_ (0.905–1.569)	0.055_x000D_ (-0.096–0.207)	-0.108_x000D_ (-0.237–0.021)	-	0.003_x000D_ (-0.132–0.138)	-0.168_x000D_ (-0.306–-0.03)	0.05_x000D_ (-0.07–0.169)	130.847_x000D_ (38.042–306.838)	1.16_x000D_ (0.501–2.469)	902.929	897.101	-1649.83	0.000326394	11.3241	0.0566203	0.959389	1.11999	1.39973	0.303931	0.379845	125342	8.30595e+06	633.022	607.911 / 638.029 / 654.584	1	60.36	no	nbinomial
model_50m_f_IBP_num_sqrt_PC2_sqrt_PC3_sqrt_PC5_sqrt_PC9	1.303_x000D_ (0.998–1.602)	0.085_x000D_ (-0.051–0.221)	-	0.193_x000D_ (0.073–0.313)	0.087_x000D_ (-0.055–0.229)	-0.079_x000D_ (-0.218–0.06)	0.095_x000D_ (-0.024–0.214)	111.184_x000D_ (32.005–258.135)	1.306_x000D_ (0.542–2.897)	899.792	894.487	-1751.25	0.000642683	13.4145	0.0670726	0.945713	1.16647	1.47159	0.316546	0.399346	1.94507	52.2515	0.755286	0.639 / 0.749 / 0.851	0.623246	49.0403	no	nbinomial
model_50m_f_IBP_num_sqrt_precip_sqrt_PC2_sqrt_PC3_sqrt_PC5_sqrt_PC9	1.205_x000D_ (0.878–1.528)	0.039_x000D_ (-0.108–0.188)	-0.092_x000D_ (-0.219–0.035)	0.185_x000D_ (0.066–0.305)	0.08_x000D_ (-0.062–0.221)	-0.102_x000D_ (-0.244–0.04)	0.086_x000D_ (-0.032–0.205)	115.234_x000D_ (34.726–253.827)	1.241_x000D_ (0.555–2.663)	898.793	892.205	-1676.1	0.000379495	22.5137	0.112569	0.949258	1.11442	1.40365	0.302422	0.380908	748220	1.53814e+08	577.655	555.188 / 582.264 / 596.958	1	55.4643	no	nbinomial

## Sheet: Table_S11_females_100m
Model	Intercept	IBP_num	sqrt_precip	sqrt_PC2	sqrt_PC3	sqrt_PC5	sqrt_PC9	sqrt_PC10	Range	Stdev	DIC	WAIC	LPML	CPO_median	cpo_failures	cpo_failure_rate	correlation	MAE	RMSE	MAE_rel	RMSE_rel	min_pred	max_pred	CV_mean	CV_q25_q50_q75	CV_high_prop	Time	non_zero_CrI	model_family
model_100m_f_	1.14_x000D_ (1.001–1.267)	-	-	-	-	-	-	-	152.329_x000D_ (51.474–336.232)	1.049_x000D_ (0.51–2.02)	910.681	905.651	-2231.51	5.2725e-05	11.4039	0.0570196	0.988271	1.19056	1.47805	0.323081	0.401098	1.80015	9.426	0.458089	0.383 / 0.427 / 0.49	0.0462206	36.8513	yes	nbinomial
model_100m_f_IBP_num	1.533_x000D_ (1.26–1.8)	0.188_x000D_ (0.069–0.307)	-	-	-	-	-	-	130.604_x000D_ (39.543–304.988)	1.177_x000D_ (0.506–2.511)	909.321	906.153	-2002.87	5.86084e-05	12.1541	0.0607703	0.958241	1.26307	1.5992	0.342759	0.433977	1.7939	11.4022	0.42704	0.352 / 0.393 / 0.452	0.0405276	39.7561	yes	nbinomial
model_100m_f_sqrt_precip	1.135_x000D_ (1–1.261)	-	-0.137_x000D_ (-0.253–-0.02)	-	-	-	-	-	159.603_x000D_ (51.048–358.657)	1.019_x000D_ (0.494–1.975)	910.278	902.335	-1886.84	0.000334497	23.9907	0.119954	0.977517	1.1535	1.42093	0.313026	0.385599	190.779	3847.12	519.634	494.111 / 524.82 / 540.345	1	45.8697	yes	nbinomial
model_100m_f_sqrt_PC2	1.129_x000D_ (0.995–1.254)	-	-	0.135_x000D_ (0.021–0.25)	-	-	-	-	153.414_x000D_ (50.211–331.29)	1.051_x000D_ (0.53–2.017)	906.205	898.196	-1909.16	0.000247484	31.1315	0.155658	0.981312	1.10503	1.36461	0.299872	0.370314	2.43924	18.0324	0.558505	0.458 / 0.524 / 0.619	0.133025	39.6068	yes	nbinomial
model_100m_f_sqrt_PC3	1.142_x000D_ (1.004–1.269)	-	-	-	0.151_x000D_ (0.033–0.269)	-	-	-	134.823_x000D_ (42.996–300.101)	1.147_x000D_ (0.535–2.323)	908.953	904.434	-2049.17	0.000241329	11.8736	0.0593678	0.974679	1.19455	1.48694	0.324165	0.403513	2.90179	18.3655	0.504414	0.42 / 0.474 / 0.544	0.0611014	34.4361	yes	nbinomial
model_100m_f_sqrt_PC5	1.13_x000D_ (0.998–1.255)	-	-	-	-	-0.172_x000D_ (-0.29–-0.054)	-	-	140.437_x000D_ (43.078–309.472)	1.123_x000D_ (0.539–2.269)	907.034	897.895	-1852.11	0.000288775	27.3549	0.136774	0.976603	1.1101	1.38677	0.301247	0.376328	0.77626	5.96399	0.496789	0.414 / 0.466 / 0.535	0.0607068	41.4742	yes	nbinomial
model_100m_f_sqrt_PC9	1.133_x000D_ (0.997–1.259)	-	-	-	-	-	0.121_x000D_ (0.008–0.234)	-	151.492_x000D_ (48.571–339.582)	1.073_x000D_ (0.515–2.103)	909.213	901.798	-1957.42	0.000730997	24.2675	0.121338	0.980619	1.14984	1.43861	0.312034	0.390396	1.93802	11.4083	0.461858	0.386 / 0.431 / 0.493	0.0475734	39.2399	yes	nbinomial
model_100m_f_sqrt_PC10	1.133_x000D_ (1–1.257)	-	-	-	-	-	-	-0.129_x000D_ (-0.246–-0.012)	152.669_x000D_ (50.659–351.398)	1.078_x000D_ (0.5–2.086)	909.206	900.097	-1955.25	0.000252999	27.1893	0.135946	0.980398	1.11344	1.39053	0.302154	0.377348	1.0948	6.20801	0.499612	0.418 / 0.469 / 0.536	0.0595231	43.0919	yes	nbinomial
model_100m_f_IBP_num_sqrt_precip	1.459_x000D_ (1.16–1.752)	0.154_x000D_ (0.022–0.288)	-0.072_x000D_ (-0.199–0.056)	-	-	-	-	-	139.204_x000D_ (40.085–328.455)	1.131_x000D_ (0.495–2.4)	909.045	905.009	-2090.19	0.000133978	6.05855	0.0302928	0.960389	1.22506	1.54293	0.332446	0.418707	8.4833e+06	6.24498e+08	567.872	545.124 / 572.765 / 586.565	1	38.7805	no	nbinomial
model_100m_f_IBP_num_sqrt_PC2	1.5_x000D_ (1.229–1.763)	0.177_x000D_ (0.058–0.295)	-	0.121_x000D_ (0.009–0.233)	-	-	-	-	131.9_x000D_ (41.57–303.95)	1.172_x000D_ (0.518–2.416)	905.995	899.263	-1804.84	0.00119028	18.8163	0.0940813	0.959182	1.17378	1.48071	0.31853	0.40182	2.65407	20.2091	0.529857	0.429 / 0.493 / 0.584	0.100558	41.1988	yes	nbinomial
model_100m_f_IBP_num_sqrt_PC3	1.437_x000D_ (1.129–1.738)	0.147_x000D_ (0.011–0.285)	-	-	0.081_x000D_ (-0.054–0.215)	-	-	-	127.778_x000D_ (38.277–298.008)	1.214_x000D_ (0.523–2.575)	907.158	900.805	-1885.31	0.000322911	13.2226	0.0661132	0.966494	1.15893	1.45013	0.3145	0.393523	2.42408	15.2556	0.531989	0.44 / 0.5 / 0.58	0.0825207	42.106	no	nbinomial
model_100m_f_IBP_num_sqrt_PC5	1.424_x000D_ (1.137–1.705)	0.143_x000D_ (0.016–0.27)	-	-	-	-0.122_x000D_ (-0.247–0.003)	-	-	126.467_x000D_ (39.1–280.131)	1.204_x000D_ (0.548–2.52)	904.398	897.187	-1816.92	0.000332693	24.8372	0.124186	0.96543	1.13597	1.42612	0.308269	0.387007	1.00723	7.42823	0.493627	0.407 / 0.46 / 0.531	0.0635252	63.9556	no	nbinomial
model_100m_f_IBP_num_sqrt_PC9	1.474_x000D_ (1.187–1.754)	0.162_x000D_ (0.036–0.288)	-	-	-	-	0.071_x000D_ (-0.046–0.189)	-	134.094_x000D_ (46.229–282.5)	1.119_x000D_ (0.553–2.182)	907.56	902.466	-1979.21	0.000296331	14.5522	0.0727612	0.964748	1.18131	1.49182	0.320573	0.404835	1.86115	10.7976	0.446559	0.371 / 0.414 / 0.475	0.0437405	42.1738	no	nbinomial
model_100m_f_IBP_num_sqrt_PC10	1.458_x000D_ (1.152–1.757)	0.16_x000D_ (0.023–0.297)	-	-	-	-	-	-0.054_x000D_ (-0.187–0.078)	137.466_x000D_ (42.733–301.249)	1.139_x000D_ (0.545–2.305)	907.349	898.366	-1895.98	0.00026095	26.6604	0.133302	0.970839	1.11904	1.39937	0.303675	0.379747	1.43774	9.68241	0.500935	0.418 / 0.47 / 0.539	0.0603123	44.3089	no	nbinomial
model_100m_f_IBP_num_sqrt_precip_sqrt_PC2	1.435_x000D_ (1.137–1.727)	0.147_x000D_ (0.015–0.28)	-0.065_x000D_ (-0.192–0.063)	0.119_x000D_ (0.006–0.231)	-	-	-	-	136.94_x000D_ (42.609–318.591)	1.123_x000D_ (0.497–2.304)	904.863	899.645	-1831.37	0.000305578	11.6124	0.0580619	0.959727	1.15713	1.45174	0.314011	0.393959	2.29003e+07	2.7278e+09	588.857	564.826 / 593.695 / 608.542	1	35.1922	no	nbinomial
model_100m_f_IBP_num_sqrt_precip_sqrt_PC3	1.366_x000D_ (1.037–1.69)	0.114_x000D_ (-0.035–0.264)	-0.072_x000D_ (-0.199–0.056)	-	0.082_x000D_ (-0.053–0.216)	-	-	-	130.48_x000D_ (38.045–302.584)	1.201_x000D_ (0.519–2.577)	907.396	900.765	-1875.45	0.00032135	20.0965	0.100483	0.965867	1.14534	1.42791	0.310812	0.387493	1.27048e+07	9.41886e+08	572.929	549.673 / 577.695 / 592.271	1	37.9231	no	nbinomial
model_100m_f_IBP_num_sqrt_precip_sqrt_PC5	1.326_x000D_ (1.006–1.64)	0.087_x000D_ (-0.056–0.23)	-0.105_x000D_ (-0.234–0.024)	-	-	-0.145_x000D_ (-0.272–-0.018)	-	-	134.77_x000D_ (36.274–333.213)	1.191_x000D_ (0.483–2.684)	911.3	906.235	-2175.37	1.65092e-05	12.6323	0.0631614	0.945908	1.26757	1.60405	0.34398	0.435292	198754	1.09286e+07	590.804	567.823 / 595.456 / 609.436	1	38.4951	no	nbinomial
model_100m_f_IBP_num_sqrt_precip_sqrt_PC9	1.415_x000D_ (1.107–1.716)	0.135_x000D_ (-0.001–0.273)	-0.064_x000D_ (-0.192–0.065)	-	-	-	0.065_x000D_ (-0.053–0.183)	-	142.241_x000D_ (43.531–327.064)	1.119_x000D_ (0.51–2.3)	909.783	903.079	-1951.01	0.000460279	18.3688	0.0918439	0.962159	1.18887	1.49903	0.322624	0.406792	2.89101e+07	2.24259e+09	560.348	538.034 / 564.956 / 578.617	1	42.333	no	nbinomial
model_100m_f_IBP_num_sqrt_precip_sqrt_PC10	1.374_x000D_ (1.034–1.708)	0.112_x000D_ (-0.042–0.268)	-0.085_x000D_ (-0.215–0.045)	-	-	-	-	-0.071_x000D_ (-0.206–0.063)	145.235_x000D_ (41.938–352.724)	1.12_x000D_ (0.479–2.377)	910.933	906.164	-2135.38	6.79893e-05	13.5761	0.0678803	0.957442	1.22968	1.55255	0.333699	0.421316	3.14335e+06	2.09366e+08	597.556	573.644 / 602.585 / 617.398	1	36.1628	no	nbinomial
model_100m_f_IBP_num_sqrt_PC2_sqrt_PC3	1.318_x000D_ (1.005–1.624)	0.089_x000D_ (-0.05–0.229)	-	0.177_x000D_ (0.056–0.298)	0.166_x000D_ (0.021–0.309)	-	-	-	118.859_x000D_ (34.825–277.665)	1.241_x000D_ (0.516–2.713)	902.515	897.463	-1768.09	0.000268266	11.1551	0.0557753	0.954385	1.16585	1.45324	0.316378	0.394368	3.04123	53.5634	0.675588	0.575 / 0.654 / 0.745	0.363339	39.467	no	nbinomial
model_100m_f_IBP_num_sqrt_PC2_sqrt_PC5	1.409_x000D_ (1.122–1.688)	0.133_x000D_ (0.007–0.259)	-	0.119_x000D_ (0.008–0.23)	-	-0.12_x000D_ (-0.245–0.004)	-	-	124.242_x000D_ (37.922–285.891)	1.212_x000D_ (0.528–2.565)	904.362	898.43	-1794.06	0.000753333	16.0474	0.0802371	0.955366	1.17247	1.47395	0.318173	0.399986	1.29312	17.8867	0.568971	0.469 / 0.538 / 0.626	0.132518	32.7279	no	nbinomial
model_100m_f_IBP_num_sqrt_PC2_sqrt_PC9	1.41_x000D_ (1.125–1.689)	0.138_x000D_ (0.013–0.264)	-	0.142_x000D_ (0.028–0.256)	-	-	0.102_x000D_ (-0.016–0.221)	-	132.977_x000D_ (41.886–288.5)	1.138_x000D_ (0.536–2.328)	899.725	893.545	-1823.73	0.000213231	20.9479	0.104739	0.964058	1.10267	1.37906	0.299233	0.374236	2.86214	22.7621	0.55144	0.45 / 0.516 / 0.609	0.121639	43.7141	no	nbinomial
model_100m_f_IBP_num_sqrt_PC2_sqrt_PC10	1.473_x000D_ (1.169–1.77)	0.164_x000D_ (0.029–0.301)	-	0.116_x000D_ (0.002–0.232)	-	-	-	-0.025_x000D_ (-0.16–0.109)	133.1_x000D_ (39.393–311.87)	1.177_x000D_ (0.51–2.49)	906.958	900.648	-1859.94	0.000858567	19.0756	0.0953779	0.95936	1.17139	1.4789	0.31788	0.401329	2.55227	19.1518	0.595788	0.502 / 0.57 / 0.651	0.157263	40.1306	no	nbinomial
model_100m_f_IBP_num_sqrt_PC3_sqrt_PC5	1.378_x000D_ (1.067–1.683)	0.121_x000D_ (-0.017–0.261)	-	-	0.052_x000D_ (-0.086–0.189)	-0.11_x000D_ (-0.239–0.019)	-	-	126.54_x000D_ (38.291–279.083)	1.207_x000D_ (0.558–2.525)	906.459	897.889	-1855.96	0.00030198	25.3972	0.126986	0.96624	1.12493	1.40507	0.305272	0.381295	1.33409	10.4468	0.597284	0.503 / 0.578 / 0.654	0.160758	45.8081	no	nbinomial
model_100m_f_IBP_num_sqrt_PC3_sqrt_PC9	1.402_x000D_ (1.088–1.709)	0.132_x000D_ (-0.008–0.272)	-	-	0.068_x000D_ (-0.069–0.205)	-	0.061_x000D_ (-0.058–0.181)	-	131.032_x000D_ (40.198–299.012)	1.186_x000D_ (0.529–2.464)	907.587	900.182	-1847.77	0.000499983	22.3317	0.111658	0.966732	1.14463	1.43558	0.310619	0.389573	2.43262	14.9392	0.532552	0.442 / 0.502 / 0.581	0.0822389	38.9759	no	nbinomial
model_100m_f_IBP_num_sqrt_PC3_sqrt_PC10	1.389_x000D_ (1.061–1.711)	0.127_x000D_ (-0.021–0.276)	-	-	0.075_x000D_ (-0.06–0.21)	-	-	-0.045_x000D_ (-0.178–0.088)	131.05_x000D_ (44.183–273.427)	1.161_x000D_ (0.573–2.301)	905.11	898.004	-1917.03	0.000184632	27.272	0.13636	0.970139	1.11113	1.38392	0.301527	0.375554	2.06515	13.5079	0.589179	0.49 / 0.571 / 0.652	0.157263	45.7574	no	nbinomial
model_100m_f_IBP_num_sqrt_PC5_sqrt_PC9	1.409_x000D_ (1.112–1.699)	0.133_x000D_ (0.002–0.263)	-	-	-	-0.109_x000D_ (-0.24–0.021)	0.043_x000D_ (-0.078–0.165)	-	135.732_x000D_ (40.289–326.837)	1.176_x000D_ (0.503–2.504)	906.645	901.938	-1855.97	0.000270787	9.19602	0.0459801	0.959244	1.18765	1.50459	0.322293	0.408301	1.14434	7.45655	0.498109	0.413 / 0.465 / 0.536	0.064878	42.5145	no	nbinomial
model_100m_f_IBP_num_sqrt_PC5_sqrt_PC10	1.404_x000D_ (1.091–1.712)	0.129_x000D_ (-0.011–0.27)	-	-	-	-0.117_x000D_ (-0.244–0.01)	-	-0.032_x000D_ (-0.165–0.102)	125.941_x000D_ (36.957–301.138)	1.23_x000D_ (0.503–2.675)	907.512	903.017	-2015.54	0.000336288	10.1627	0.0508136	0.957838	1.20183	1.52173	0.326141	0.412953	1.02397	6.73489	0.512877	0.425 / 0.484 / 0.555	0.0666253	39.3969	no	nbinomial
model_100m_f_IBP_num_sqrt_PC9_sqrt_PC10	1.409_x000D_ (1.089–1.723)	0.134_x000D_ (-0.009–0.278)	-	-	-	-	0.072_x000D_ (-0.045–0.19)	-0.055_x000D_ (-0.188–0.078)	140.406_x000D_ (43.156–325.319)	1.136_x000D_ (0.512–2.334)	908.415	901.391	-1913.12	0.00043446	17.9589	0.0897944	0.965598	1.15608	1.46053	0.313726	0.396346	1.55111	9.21098	0.497838	0.416 / 0.468 / 0.535	0.0579449	34.0686	no	nbinomial
model_100m_f_IBP_num_sqrt_precip_sqrt_PC2_sqrt_PC3	1.26_x000D_ (0.929–1.586)	0.06_x000D_ (-0.089–0.211)	-0.063_x000D_ (-0.188–0.062)	0.174_x000D_ (0.053–0.294)	0.165_x000D_ (0.021–0.308)	-	-	-	123.908_x000D_ (36.63–293.246)	1.217_x000D_ (0.508–2.621)	903.927	898.789	-1746.58	0.000848843	18.7558	0.0937792	0.950897	1.18	1.47218	0.320217	0.399505	1.72836e+07	3.77641e+09	542.07	520.11 / 546.585 / 560.464	1	46.4595	no	nbinomial
model_100m_f_IBP_num_sqrt_precip_sqrt_PC2_sqrt_PC5	1.306_x000D_ (0.988–1.619)	0.081_x000D_ (-0.061–0.224)	-0.097_x000D_ (-0.226–0.032)	0.114_x000D_ (0.004–0.225)	-	-0.141_x000D_ (-0.268–-0.015)	-	-	127.056_x000D_ (34.121–311.951)	1.202_x000D_ (0.478–2.702)	907.131	901.738	-1873.8	0.00036216	9.94982	0.0497491	0.94735	1.2072	1.51885	0.327598	0.41217	715953	6.67768e+07	573.736	551.558 / 578.267 / 591.6	1	43.1477	no	nbinomial
model_100m_f_IBP_num_sqrt_precip_sqrt_PC2_sqrt_PC9	1.372_x000D_ (1.064–1.672)	0.117_x000D_ (-0.019–0.254)	-0.053_x000D_ (-0.181–0.076)	0.139_x000D_ (0.024–0.254)	-	-	0.096_x000D_ (-0.023–0.216)	-	138.556_x000D_ (39.235–322)	1.131_x000D_ (0.505–2.388)	904.917	899.396	-1820.02	0.00072822	18.485	0.0924249	0.956579	1.16556	1.46637	0.316298	0.397929	1.28882e+08	1.74512e+10	567.735	545.036 / 572.322 / 586.213	1	42.5963	no	nbinomial
model_100m_f_IBP_num_sqrt_precip_sqrt_PC2_sqrt_PC10	1.395_x000D_ (1.057–1.728)	0.123_x000D_ (-0.031–0.278)	-0.074_x000D_ (-0.204–0.056)	0.11_x000D_ (-0.005–0.226)	-	-	-	-0.042_x000D_ (-0.179–0.096)	138.913_x000D_ (38.877–358.203)	1.166_x000D_ (0.447–2.54)	910.554	905.223	-2151.47	4.93346e-05	13.8646	0.069323	0.951043	1.22097	1.54401	0.331336	0.419	1.98843e+07	2.22004e+09	601.447	577.465 / 606.693 / 620.912	1	48.6486	no	nbinomial
model_100m_f_IBP_num_sqrt_precip_sqrt_PC3_sqrt_PC5	1.282_x000D_ (0.945–1.614)	0.068_x000D_ (-0.084–0.222)	-0.103_x000D_ (-0.232–0.027)	-	0.047_x000D_ (-0.09–0.183)	-0.133_x000D_ (-0.264–-0.003)	-	-	130.133_x000D_ (36.468–302.897)	1.192_x000D_ (0.518–2.606)	910.942	904.47	-1992.84	0.000179039	17.8119	0.0890596	0.951527	1.22807	1.54378	0.333262	0.418935	386860	2.23393e+07	575.478	553.785 / 580.034 / 594.012	1	37.8921	no	nbinomial
model_100m_f_IBP_num_sqrt_precip_sqrt_PC3_sqrt_PC9	1.357_x000D_ (1.025–1.685)	0.103_x000D_ (-0.046–0.254)	-0.066_x000D_ (-0.194–0.062)	-	0.071_x000D_ (-0.066–0.207)	-	0.054_x000D_ (-0.065–0.173)	-	137.682_x000D_ (44.239–323.722)	1.15_x000D_ (0.504–2.388)	913.368	908.362	-2150.1	1.33544e-05	21.7211	0.108605	0.952503	1.25694	1.59157	0.341096	0.431904	2.22027e+07	1.5253e+09	571.478	548.334 / 576.081 / 590.624	1	41.82	no	nbinomial
model_100m_f_IBP_num_sqrt_precip_sqrt_PC3_sqrt_PC10	1.334_x000D_ (0.976–1.691)	0.078_x000D_ (-0.087–0.244)	-0.088_x000D_ (-0.217–0.042)	-	0.076_x000D_ (-0.059–0.211)	-	-	-0.064_x000D_ (-0.2–0.072)	151.474_x000D_ (49.575–386.642)	1.17_x000D_ (0.486–2.51)	928.924	919.067	-1464.12	0.0016919	0.389371	0.00194685	0.918342	1.44391	1.85405	0.391834	0.503135	3.70341e+06	2.23093e+08	588.166	564.783 / 593.069 / 608.086	1	38.5678	no	nbinomial
model_100m_f_IBP_num_sqrt_precip_sqrt_PC5_sqrt_PC9	1.314_x000D_ (0.992–1.63)	0.083_x000D_ (-0.061–0.229)	-0.099_x000D_ (-0.231–0.033)	-	-	-0.136_x000D_ (-0.269–-0.002)	0.026_x000D_ (-0.096–0.149)	-	131.652_x000D_ (37.056–320.786)	1.198_x000D_ (0.489–2.628)	911.46	904.695	-2062.99	4.56256e-05	18.4996	0.092498	0.951047	1.22882	1.55076	0.333467	0.42083	1.00817e+06	5.65231e+07	587.394	565.296 / 591.872 / 605.415	1	35.5236	no	nbinomial
model_100m_f_IBP_num_sqrt_precip_sqrt_PC5_sqrt_PC10	1.261_x000D_ (0.911–1.605)	0.06_x000D_ (-0.1–0.22)	-0.112_x000D_ (-0.243–0.019)	-	-	-0.137_x000D_ (-0.265–-0.009)	-	-0.051_x000D_ (-0.185–0.084)	132.991_x000D_ (44.015–281.445)	1.126_x000D_ (0.547–2.264)	908.479	901.888	-1876.78	0.000799549	19.3013	0.0965065	0.955379	1.18923	1.49444	0.322722	0.405547	149632	8.60579e+06	577.083	555.425 / 581.755 / 595.164	1	40.3829	no	nbinomial
model_100m_f_IBP_num_sqrt_precip_sqrt_PC9_sqrt_PC10	1.336_x000D_ (0.986–1.679)	0.093_x000D_ (-0.065–0.252)	-0.076_x000D_ (-0.207–0.056)	-	-	-	0.064_x000D_ (-0.054–0.182)	-0.07_x000D_ (-0.205–0.065)	145.118_x000D_ (44.641–320.579)	1.082_x000D_ (0.52–2.178)	909.982	903.37	-1907.11	0.000306044	23.8789	0.119394	0.964648	1.15539	1.44847	0.313539	0.393072	1.41171e+07	1.04323e+09	586.067	562.884 / 591.02 / 605.364	1	39.9769	no	nbinomial
model_100m_f_IBP_num_sqrt_PC2_sqrt_PC3_sqrt_PC5	1.282_x000D_ (0.965–1.592)	0.071_x000D_ (-0.069–0.213)	-	0.166_x000D_ (0.045–0.288)	0.138_x000D_ (-0.011–0.286)	-0.089_x000D_ (-0.217–0.04)	-	-	118.858_x000D_ (33.982–271.974)	1.238_x000D_ (0.534–2.712)	903.889	898.447	-1778.91	0.000571149	14.7629	0.0738145	0.951299	1.18324	1.4738	0.321096	0.399945	1.92447	39.464	0.752566	0.661 / 0.74 / 0.823	0.634913	47.3023	no	nbinomial
model_100m_f_IBP_num_sqrt_PC2_sqrt_PC3_sqrt_PC9	1.272_x000D_ (0.953–1.587)	0.062_x000D_ (-0.08–0.205)	-	0.191_x000D_ (0.069–0.313)	0.155_x000D_ (0.011–0.298)	-	0.089_x000D_ (-0.028–0.206)	-	123.168_x000D_ (35.285–302.248)	1.218_x000D_ (0.482–2.7)	905.523	902.663	-1728.27	0.00188577	12.0037	0.0600185	0.939243	1.25779	1.58882	0.341326	0.431159	3.1349	54.7483	0.652307	0.556 / 0.634 / 0.72	0.298348	40.1332	no	nbinomial
model_100m_f_IBP_num_sqrt_PC2_sqrt_PC3_sqrt_PC10	1.324_x000D_ (0.995–1.647)	0.092_x000D_ (-0.056–0.241)	-	0.179_x000D_ (0.052–0.305)	0.167_x000D_ (0.019–0.315)	-	-	0.008_x000D_ (-0.128–0.145)	122.426_x000D_ (36.362–285.357)	1.228_x000D_ (0.524–2.645)	904.439	899.275	-1834.58	0.000428117	13.4492	0.0672459	0.953952	1.17284	1.46255	0.318274	0.396893	3.02978	59.6983	0.774405	0.677 / 0.771 / 0.857	0.699791	40.8703	no	nbinomial
model_100m_f_IBP_num_sqrt_PC2_sqrt_PC5_sqrt_PC9	1.37_x000D_ (1.076–1.657)	0.113_x000D_ (-0.016–0.243)	-	0.135_x000D_ (0.021–0.249)	-	-0.098_x000D_ (-0.227–0.031)	0.076_x000D_ (-0.047–0.199)	-	124.866_x000D_ (36.706–299.314)	1.224_x000D_ (0.501–2.655)	905.359	899.833	-1829.04	0.000758536	17.5359	0.0876797	0.950655	1.19513	1.51139	0.324324	0.410147	1.61249	20.0778	0.58616	0.488 / 0.557 / 0.645	0.154557	42.2304	no	nbinomial
model_100m_f_IBP_num_sqrt_PC2_sqrt_PC5_sqrt_PC10	1.414_x000D_ (1.105–1.718)	0.132_x000D_ (-0.006–0.271)	-	0.119_x000D_ (0.005–0.232)	-	-0.12_x000D_ (-0.246–0.006)	-	-0.002_x000D_ (-0.138–0.133)	122.815_x000D_ (35.891–286.907)	1.225_x000D_ (0.516–2.673)	907.301	903.681	-2139.08	3.03575e-05	8.47621	0.0423811	0.947208	1.23539	1.56302	0.335247	0.424158	1.30896	18.0889	0.602831	0.514 / 0.582 / 0.659	0.164647	46.6435	no	nbinomial
model_100m_f_IBP_num_sqrt_PC2_sqrt_PC9_sqrt_PC10	1.398_x000D_ (1.081–1.709)	0.129_x000D_ (-0.013–0.271)	-	0.138_x000D_ (0.021–0.256)	-	-	0.102_x000D_ (-0.017–0.221)	-0.022_x000D_ (-0.157–0.113)	133.434_x000D_ (40.195–307.401)	1.142_x000D_ (0.507–2.393)	906.03	900.701	-1928.83	0.000304822	9.00871	0.0450435	0.95625	1.17282	1.48355	0.318268	0.402592	2.86737	21.9224	0.606689	0.514 / 0.583 / 0.664	0.177442	43.5213	no	nbinomial
model_100m_f_IBP_num_sqrt_PC3_sqrt_PC5_sqrt_PC9	1.364_x000D_ (1.048–1.673)	0.114_x000D_ (-0.027–0.256)	-	-	0.047_x000D_ (-0.092–0.185)	-0.1_x000D_ (-0.233–0.033)	0.038_x000D_ (-0.084–0.161)	-	127.354_x000D_ (40.25–279.851)	1.195_x000D_ (0.552–2.466)	907.035	899.407	-1893.85	0.000343079	24.5701	0.12285	0.964571	1.13753	1.42683	0.308693	0.387198	1.4356	10.0997	0.602551	0.508 / 0.584 / 0.661	0.169889	50.9621	no	nbinomial
model_100m_f_IBP_num_sqrt_PC3_sqrt_PC5_sqrt_PC10	1.354_x000D_ (1.022–1.68)	0.11_x000D_ (-0.04–0.26)	-	-	0.05_x000D_ (-0.089–0.188)	-0.106_x000D_ (-0.236–0.025)	-	-0.028_x000D_ (-0.162–0.107)	128.496_x000D_ (39.51–282.408)	1.19_x000D_ (0.555–2.461)	906.369	898.973	-1885.98	0.000279262	26.0054	0.130027	0.965837	1.12672	1.40784	0.305759	0.382047	1.30135	9.95073	0.635278	0.536 / 0.625 / 0.706	0.264416	50.8981	no	nbinomial
model_100m_f_IBP_num_sqrt_PC3_sqrt_PC9_sqrt_PC10	1.354_x000D_ (1.015–1.687)	0.111_x000D_ (-0.042–0.264)	-	-	0.062_x000D_ (-0.077–0.2)	-	0.062_x000D_ (-0.057–0.183)	-0.047_x000D_ (-0.182–0.087)	134.757_x000D_ (43.129–301.507)	1.151_x000D_ (0.534–2.318)	905.664	899.282	-1871.25	0.00029587	16.1893	0.0809464	0.968501	1.11476	1.39618	0.302513	0.378881	2.06227	12.9209	0.59132	0.492 / 0.573 / 0.655	0.161603	52.5362	no	nbinomial
model_100m_f_IBP_num_sqrt_PC5_sqrt_PC9_sqrt_PC10	1.388_x000D_ (1.065–1.705)	0.117_x000D_ (-0.027–0.262)	-	-	-	-0.103_x000D_ (-0.236–0.03)	0.045_x000D_ (-0.077–0.167)	-0.035_x000D_ (-0.17–0.1)	137.289_x000D_ (38.243–344.935)	1.186_x000D_ (0.475–2.659)	910.16	908.539	-2470.99	1.05497e-06	2.39202	0.0119601	0.948607	1.26458	1.61587	0.343171	0.438498	1.17669	6.63946	0.511232	0.425 / 0.485 / 0.555	0.0651598	38.2293	no	nbinomial
model_100m_f_IBP_num_sqrt_precip_sqrt_PC2_sqrt_PC3_sqrt_PC5	1.2_x000D_ (0.862–1.533)	0.028_x000D_ (-0.125–0.182)	-0.088_x000D_ (-0.215–0.039)	0.159_x000D_ (0.038–0.28)	0.13_x000D_ (-0.018–0.278)	-0.11_x000D_ (-0.24–0.021)	-	-	123.595_x000D_ (37.068–303.803)	1.22_x000D_ (0.485–2.635)	907.288	901.386	-1769.16	0.00121914	15.5801	0.0779005	0.941694	1.22638	1.53096	0.332803	0.415458	1.85591e+06	2.97062e+08	573.804	551.788 / 578.449 / 592.371	1	43.821	no	nbinomial
model_100m_f_IBP_num_sqrt_precip_sqrt_PC2_sqrt_PC3_sqrt_PC9	1.226_x000D_ (0.891–1.557)	0.04_x000D_ (-0.111–0.192)	-0.053_x000D_ (-0.178–0.072)	0.187_x000D_ (0.066–0.309)	0.155_x000D_ (0.011–0.298)	-	0.083_x000D_ (-0.035–0.2)	-	127.191_x000D_ (38.455–294.42)	1.162_x000D_ (0.503–2.495)	907.62	903.372	-1784.52	0.000992091	17.27	0.0863502	0.939253	1.25004	1.57491	0.339223	0.427383	5.48458e+07	1.36275e+10	558.241	535.407 / 562.882 / 577.223	1	47.1921	no	nbinomial
model_100m_f_IBP_num_sqrt_precip_sqrt_PC2_sqrt_PC3_sqrt_PC10	1.256_x000D_ (0.901–1.606)	0.057_x000D_ (-0.105–0.22)	-0.065_x000D_ (-0.193–0.063)	0.172_x000D_ (0.045–0.298)	0.163_x000D_ (0.015–0.31)	-	-	-0.007_x000D_ (-0.146–0.132)	125.761_x000D_ (38.827–287.169)	1.189_x000D_ (0.524–2.504)	906.802	901.612	-1784.57	0.00148729	17.5553	0.0877767	0.948244	1.20194	1.50265	0.32617	0.407774	3.36707e+07	1.12974e+10	569.68	547.39 / 574.765 / 588.907	1	40.7021	no	nbinomial
model_100m_f_IBP_num_sqrt_precip_sqrt_PC2_sqrt_PC5_sqrt_PC9	1.279_x000D_ (0.959–1.593)	0.073_x000D_ (-0.071–0.217)	-0.084_x000D_ (-0.215–0.048)	0.128_x000D_ (0.014–0.242)	-	-0.121_x000D_ (-0.254–0.013)	0.06_x000D_ (-0.065–0.185)	-	128.632_x000D_ (36.397–320.047)	1.218_x000D_ (0.477–2.669)	903.849	896.851	-1758.48	0.000398608	26.1727	0.130864	0.956096	1.13313	1.41517	0.307498	0.384036	8.99361e+06	9.61491e+08	606.397	583.123 / 611.174 / 625.054	1	57.7632	no	nbinomial
model_100m_f_IBP_num_sqrt_precip_sqrt_PC2_sqrt_PC5_sqrt_PC10	1.289_x000D_ (0.939–1.633)	0.069_x000D_ (-0.09–0.229)	-0.102_x000D_ (-0.233–0.029)	0.11_x000D_ (-0.003–0.224)	-	-0.139_x000D_ (-0.266–-0.011)	-	-0.022_x000D_ (-0.159–0.115)	133.652_x000D_ (35.916–322.031)	1.158_x000D_ (0.485–2.598)	909.186	906.365	-2146.18	9.25131e-05	5.38367	0.0269183	0.938473	1.26751	1.60193	0.343965	0.434717	570595	6.39106e+07	608.544	585.177 / 613.708 / 627.598	1	42.5931	no	nbinomial
model_100m_f_IBP_num_sqrt_precip_sqrt_PC2_sqrt_PC9_sqrt_PC10	1.327_x000D_ (0.981–1.666)	0.098_x000D_ (-0.06–0.256)	-0.059_x000D_ (-0.19–0.073)	0.132_x000D_ (0.014–0.251)	-	-	0.094_x000D_ (-0.026–0.215)	-0.035_x000D_ (-0.173–0.104)	139.6_x000D_ (40.248–330.173)	1.144_x000D_ (0.495–2.419)	904.85	897.647	-1856.48	0.000277586	25.3903	0.126951	0.961467	1.11301	1.39363	0.302039	0.378191	1.87138e+08	2.79281e+10	613.801	589.28 / 619.24 / 633.619	1	51.5443	no	nbinomial
model_100m_f_IBP_num_sqrt_precip_sqrt_PC3_sqrt_PC5_sqrt_PC9	1.274_x000D_ (0.931–1.611)	0.067_x000D_ (-0.087–0.223)	-0.098_x000D_ (-0.23–0.035)	-	0.044_x000D_ (-0.095–0.183)	-0.127_x000D_ (-0.264–0.011)	0.022_x000D_ (-0.102–0.146)	-	131.311_x000D_ (33.205–332.187)	1.236_x000D_ (0.482–2.823)	909.669	904.466	-2018.38	0.000285001	13.2687	0.0663434	0.954557	1.20321	1.51043	0.326515	0.409885	1.90226e+06	1.13345e+08	591.59	569.637 / 596.237 / 610.226	1	43.426	no	nbinomial
model_100m_f_IBP_num_sqrt_precip_sqrt_PC3_sqrt_PC5_sqrt_PC10	1.234_x000D_ (0.869–1.593)	0.046_x000D_ (-0.121–0.213)	-0.11_x000D_ (-0.241–0.022)	-	0.043_x000D_ (-0.095–0.18)	-0.128_x000D_ (-0.26–0.004)	-	-0.047_x000D_ (-0.182–0.088)	133.334_x000D_ (39.108–309.73)	1.163_x000D_ (0.512–2.472)	910.951	904.907	-1964.65	0.000277843	18.2403	0.0912017	0.951871	1.21571	1.52887	0.329907	0.414891	288504	1.68508e+07	590.293	568.556 / 595.02 / 609.435	1	38.6268	no	nbinomial
model_100m_f_IBP_num_sqrt_precip_sqrt_PC3_sqrt_PC9_sqrt_PC10	1.272_x000D_ (0.907–1.631)	0.07_x000D_ (-0.097–0.238)	-0.077_x000D_ (-0.207–0.055)	-	0.063_x000D_ (-0.075–0.2)	-	0.055_x000D_ (-0.065–0.175)	-0.063_x000D_ (-0.199–0.074)	139.413_x000D_ (42.605–309.341)	1.123_x000D_ (0.53–2.29)	909.392	900.677	-1915.62	0.000235138	27.4567	0.137284	0.966613	1.11667	1.39413	0.303032	0.378325	1.60284e+07	1.16573e+09	586.517	563.292 / 591.553 / 606.381	1	47.1908	no	nbinomial
model_100m_f_IBP_num_sqrt_precip_sqrt_PC5_sqrt_PC9_sqrt_PC10	1.245_x000D_ (0.888–1.596)	0.056_x000D_ (-0.106–0.219)	-0.106_x000D_ (-0.24–0.028)	-	-	-0.128_x000D_ (-0.263–0.008)	0.028_x000D_ (-0.095–0.152)	-0.052_x000D_ (-0.187–0.084)	138.253_x000D_ (36.673–331.829)	1.169_x000D_ (0.502–2.548)	908.948	900.626	-1861.48	0.00030178	22.9236	0.114618	0.960794	1.14347	1.43131	0.310305	0.388416	953748	5.73722e+07	615.15	592.284 / 620.047 / 634.22	1	54.7863	no	nbinomial
model_100m_f_IBP_num_sqrt_PC2_sqrt_PC3_sqrt_PC5_sqrt_PC9	1.244_x000D_ (0.922–1.56)	0.054_x000D_ (-0.09–0.198)	-	0.181_x000D_ (0.057–0.304)	0.136_x000D_ (-0.014–0.284)	-0.068_x000D_ (-0.201–0.065)	0.072_x000D_ (-0.049–0.194)	-	120.748_x000D_ (36.309–280.138)	1.219_x000D_ (0.517–2.615)	903.126	898.658	-1748.06	0.000802506	16.0632	0.0803161	0.949248	1.18787	1.48298	0.322354	0.402436	2.3416	45.8703	0.766991	0.675 / 0.757 / 0.84	0.682374	39.6886	no	nbinomial
model_100m_f_IBP_num_sqrt_PC2_sqrt_PC3_sqrt_PC5_sqrt_PC10	1.303_x000D_ (0.965–1.659)	0.079_x000D_ (-0.07–0.229)	-	0.171_x000D_ (0.045–0.298)	0.142_x000D_ (-0.01–0.294)	-0.091_x000D_ (-0.221–0.039)	-	0.021_x000D_ (-0.116–0.158)	118.011_x000D_ (34.276–279.806)	1.264_x000D_ (0.515–2.779)	904.728	898.898	-1788.2	0.000529035	17.2534	0.0862671	0.953326	1.16302	1.44655	0.315609	0.39255	1.88888	44.7104	0.83949	0.742 / 0.838 / 0.924	0.81912	40.495	no	nbinomial
model_100m_f_IBP_num_sqrt_PC2_sqrt_PC3_sqrt_PC9_sqrt_PC10	1.261_x000D_ (0.926–1.591)	0.065_x000D_ (-0.086–0.218)	-	0.194_x000D_ (0.067–0.321)	0.157_x000D_ (0.008–0.304)	-	0.089_x000D_ (-0.028–0.207)	0.009_x000D_ (-0.127–0.145)	123.554_x000D_ (39.277–265.904)	1.176_x000D_ (0.549–2.437)	901.757	895.916	-1798.18	0.000340285	24.1941	0.120971	0.956993	1.12823	1.40569	0.306168	0.381464	3.09042	61.2732	0.777457	0.682 / 0.775 / 0.86	0.710557	53.871	no	nbinomial
model_100m_f_IBP_num_sqrt_PC2_sqrt_PC5_sqrt_PC9_sqrt_PC10	1.364_x000D_ (1.043–1.678)	0.112_x000D_ (-0.032–0.256)	-	0.134_x000D_ (0.017–0.252)	-	-0.097_x000D_ (-0.229–0.036)	0.076_x000D_ (-0.048–0.2)	-0.004_x000D_ (-0.141–0.132)	126.719_x000D_ (31.717–301.589)	1.22_x000D_ (0.512–2.785)	905.917	902.367	-2056.01	0.000197724	5.19078	0.0259539	0.950663	1.20162	1.52129	0.326085	0.412834	1.64505	20.2969	0.638549	0.548 / 0.62 / 0.699	0.248239	42.6281	no	nbinomial
model_100m_f_IBP_num_sqrt_PC3_sqrt_PC5_sqrt_PC9_sqrt_PC10	1.334_x000D_ (0.995–1.666)	0.101_x000D_ (-0.052–0.254)	-	-	0.044_x000D_ (-0.096–0.183)	-0.094_x000D_ (-0.23–0.041)	0.041_x000D_ (-0.082–0.164)	-0.031_x000D_ (-0.167–0.104)	131.893_x000D_ (38.102–296.456)	1.192_x000D_ (0.547–2.515)	909.136	899.828	-1931.31	0.000244363	25.0163	0.125082	0.966421	1.11693	1.39845	0.303101	0.379497	1.39639	9.47777	0.641266	0.542 / 0.631 / 0.713	0.281777	46.7681	no	nbinomial
model_100m_f_IBP_num_sqrt_precip_sqrt_PC2_sqrt_PC3_sqrt_PC5_sqrt_PC9	1.178_x000D_ (0.835–1.515)	0.02_x000D_ (-0.135–0.175)	-0.076_x000D_ (-0.206–0.055)	0.172_x000D_ (0.048–0.296)	0.129_x000D_ (-0.02–0.278)	-0.09_x000D_ (-0.227–0.048)	0.058_x000D_ (-0.066–0.182)	-	126.024_x000D_ (35.464–304.539)	1.204_x000D_ (0.493–2.654)	905.99	901.121	-1786.86	0.000816876	15.209	0.0760451	0.944287	1.20803	1.50754	0.327823	0.409102	1.88601e+07	4.58682e+09	581.969	560.385 / 586.594 / 600.149	1	39.2086	no	nbinomial
model_100m_f_IBP_num_sqrt_precip_sqrt_PC2_sqrt_PC3_sqrt_PC5_sqrt_PC10	1.197_x000D_ (0.836–1.552)	0.029_x000D_ (-0.136–0.195)	-0.088_x000D_ (-0.218–0.043)	0.16_x000D_ (0.033–0.286)	0.13_x000D_ (-0.022–0.282)	-0.11_x000D_ (-0.241–0.022)	-	0.002_x000D_ (-0.137–0.141)	125.188_x000D_ (36.968–296.896)	1.213_x000D_ (0.509–2.617)	906.961	901.098	-1773.33	0.000941373	17.3973	0.0869867	0.94629	1.1974	1.49055	0.324938	0.404492	4.97985e+06	1.30216e+09	589.414	567.798 / 594.239 / 608.328	1	49.2831	no	nbinomial
model_100m_f_IBP_num_sqrt_precip_sqrt_PC2_sqrt_PC3_sqrt_PC9_sqrt_PC10	1.215_x000D_ (0.854–1.57)	0.039_x000D_ (-0.126–0.205)	-0.053_x000D_ (-0.182–0.076)	0.187_x000D_ (0.059–0.315)	0.154_x000D_ (0.005–0.302)	-	0.083_x000D_ (-0.036–0.202)	-0.004_x000D_ (-0.143–0.136)	127.26_x000D_ (37.335–304.607)	1.193_x000D_ (0.494–2.564)	906.248	901.27	-1819.17	0.000951116	16.0748	0.0803739	0.948473	1.18777	1.48756	0.322326	0.403681	1.91434e+08	8.23869e+10	574.309	551.993 / 579.407 / 593.453	1	46.175	no	nbinomial
model_100m_f_IBP_num_sqrt_precip_sqrt_PC2_sqrt_PC5_sqrt_PC9_sqrt_PC10	1.263_x000D_ (0.911–1.609)	0.062_x000D_ (-0.098–0.224)	-0.088_x000D_ (-0.222–0.046)	0.124_x000D_ (0.007–0.241)	-	-0.118_x000D_ (-0.253–0.017)	0.059_x000D_ (-0.066–0.185)	-0.02_x000D_ (-0.158–0.117)	131.189_x000D_ (38.264–306.688)	1.164_x000D_ (0.502–2.489)	908.166	901.851	-1843.15	0.0009785	18.5275	0.0926374	0.949359	1.18775	1.49323	0.322321	0.405218	1.05289e+07	1.34735e+09	593.39	571.643 / 598.133 / 611.1	1	38.9902	no	nbinomial
model_100m_f_IBP_num_sqrt_precip_sqrt_PC3_sqrt_PC5_sqrt_PC9_sqrt_PC10	1.305_x000D_ (0.942–1.668)	0.021_x000D_ (-0.149–0.191)	-0.133_x000D_ (-0.266–0)	-	0.055_x000D_ (-0.085–0.195)	-0.13_x000D_ (-0.27–0.009)	0.017_x000D_ (-0.104–0.138)	-0.056_x000D_ (-0.195–0.082)	36.571_x000D_ (1.58–146.015)	0.706_x000D_ (0.05–2.587)	938.988	940.518	-470.813	0.118158	0	0	0.385605	2.193	2.87574	0.595116	0.78039	36901.4	1.08673e+06	657.967	632.114 / 663.169 / 679.872	1	41.4037	no	nbinomial
model_100m_f_IBP_num_sqrt_PC2_sqrt_PC3_sqrt_PC5_sqrt_PC9_sqrt_PC10	1.256_x000D_ (0.918–1.588)	0.06_x000D_ (-0.092–0.213)	-	0.185_x000D_ (0.057–0.314)	0.139_x000D_ (-0.013–0.291)	-0.07_x000D_ (-0.205–0.065)	0.072_x000D_ (-0.05–0.195)	0.018_x000D_ (-0.119–0.156)	120.801_x000D_ (34.689–284.325)	1.234_x000D_ (0.513–2.707)	905.471	899.99	-1824.01	0.000563105	14.9127	0.0745633	0.951069	1.1753	1.4665	0.318943	0.397964	2.30303	49.7073	0.851674	0.756 / 0.855 / 0.94	0.833549	34.2947	no	nbinomial
model_100m_f_IBP_num_sqrt_precip_sqrt_PC2_sqrt_PC3_sqrt_PC5_sqrt_PC9_sqrt_PC10	1.178_x000D_ (0.815–1.538)	0.021_x000D_ (-0.145–0.189)	-0.075_x000D_ (-0.208–0.059)	0.172_x000D_ (0.042–0.302)	0.129_x000D_ (-0.024–0.281)	-0.089_x000D_ (-0.228–0.05)	0.058_x000D_ (-0.066–0.183)	0.003_x000D_ (-0.137–0.143)	125.299_x000D_ (36.524–288.412)	1.189_x000D_ (0.518–2.551)	906.448	900.533	-1849.25	0.000594517	20.8924	0.104462	0.951244	1.15995	1.44002	0.314775	0.390778	5.86052e+07	2.29227e+10	606.566	584.851 / 611.514 / 625.417	1	42.6709	no	nbinomial
