# Supplementary material
Source: Research Square preprint supplement (doi:10.21203/rs.3.rs-9762487/v1)
Supplement: Supplementary file 5 [file 9e824f86e9734edf460b65af.xlsx]

## Sheet: READ ME
Read me
Each worksheet is labeled according to the buffer radius used.
This tables presents summary statistics for the covariates used in the analysis. For each variable, the minimum, maximum, mean, and standard deviation are reported. All statistics refer to the variables in their original (non-standardized) scale.
Variables:
IBP_num — IBP index
humidity — relative humidity (%)
precipitation — precipitation (mm)
temperature — temperature (°C)
sqrt_humid — square-root transformation of humidity
sqrt_precip — square-root transformation of precipitation
sqrt_temp — square-root transformation of temperature
Land-use and land-cover variables:
PC1 / sqrt_PC1 — Cement
PC2 / sqrt_PC2 — Tree
PC3 / sqrt_PC3 — Asbestos tile
PC4 / sqrt_PC4 — Swimming pool
PC5 / sqrt_PC5 — Exposed soil
PC6 / sqrt_PC6 — Grass
PC7 / sqrt_PC7 — Asphalt
PC8 / sqrt_PC8 — Zinc tile
PC9 / sqrt_PC9 — Shade
PC10 / sqrt_PC10 — Ceramic tile

## Sheet: Table_S1_values_buffer_20m
Variable	Minimum value	Maximum value	Mean	Standard deviation
IBP_num	-3.0649	1.5998	-2.0284	0.9384
precipitation	12959.6	15814.8	14442.4	858.032
temperature	24.475	25.6375	25.1208	0.2693
humidity	58.055	58.6125	58.2519	0.1251
PC1	0	72.5788	7.604	11.3714
PC2	0	84.249	10.8247	13.6992
PC3	0	86.9637	17.5827	18.07
PC4	0	5.7446	0.2345	0.6801
PC5	0	78.642	13.6079	17.8365
PC6	0	39.5462	4.8792	8.26
PC7	0	65.8102	23.0145	13.9356
PC8	0	55.9312	4.0224	8.6218
PC9	0	13.2612	0.6683	1.6041
PC10	0	50.5589	17.5619	13.0747

## Sheet: Table_S2_values_buffer_30m
Variable	Minimum value	Maximum value	Mean	Standard deviation
IBP_num	-3.0649	1.5998	-2.0284	0.9384
precipitation	12959.6	15814.8	14441.1	858.297
temperature	24.475	25.6375	25.1224	0.2698
humidity	58.055	58.6125	58.2517	0.1248
PC1	0	59.5906	7.4525	9.5084
PC2	0	67.4424	12.455	12.0576
PC3	0	74.3377	17.7105	15.5273
PC4	0	2.99	0.2112	0.4705
PC5	0	61.9498	12.316	13.8093
PC6	0	39.5296	6.0909	7.4622
PC7	0.0414	51.4021	22.9668	10.5595
PC8	0	43.2173	4.3565	6.9157
PC9	0	11.3775	0.7619	1.443
PC10	0	50.0923	15.679	10.224

## Sheet: Table_S3_values_buffer_100m
Variable	Minimum value	Maximum value	Mean	Standard deviation
IBP_num	-3.0649	1.5998	-2.0284	0.9384
precipitation	12959.6	15807.6	14440.4	856.55
temperature	24.475	25.6375	25.1225	0.27
humidity	58.055	58.5975	58.2516	0.1232
PC1	0.1286	34.3761	6.5655	5.7734
PC2	1.5167	58.6906	15.2241	9.6725
PC3	1.0623	55.6504	17.4329	10.2654
PC4	0	1.195	0.1941	0.2163
PC5	0	40.9965	9.8942	7.9086
PC6	0.2931	46.0994	9.7048	8.3355
PC7	1.8235	38.3198	21.5965	6.1818
PC8	0.104	24.3937	5.4286	4.3289
PC9	0	4.8193	0.89	0.8626
PC10	0.4389	33.5034	13.0695	7.0325
