# Supplementary material
Source: Research Square preprint supplement (doi:10.21203/rs.3.rs-9762487/v1)
Supplement: Supplementary file 6 [file a34921cc6f9d94f9373be8dc.xlsx]

## Sheet: Read Me
Read me
Each worksheet is labeled according to the buffer radius used. Within each worksheet, regression models are identified by the covariates included. Models are further characterized by the buffer radius used for spatial aggregation of covariates (20, 30, 50, and 100 m).
The prefix “PC_” indicates that the covariate represents the percentage of a given land-use and land-cover class within the buffer. The prefix “sqrt_PC” indicates square-root of the percentage of each variable. Land-use and land-cover classes were maintained as coded categories to facilitate data organization.
Variables:
IBP_num — IBP index
humidity — relative humidity (%)
precipitation — precipitation (mm)
temperature — temperature (°C)
sqrt_humid — square-root transformation of humidity
sqrt_precip — square-root transformation of precipitation
sqrt_temp — square-root transformation of temperature
Land-use and land-cover variables:
PC1 / sqrt_PC1 — Cement
PC2 / sqrt_PC2 — Tree
PC3 / sqrt_PC3 — Asbestos tile
PC4 / sqrt_PC4 — Swimming pool
PC5 / sqrt_PC5 — Exposed soil
PC6 / sqrt_PC6 — Grass
PC7 / sqrt_PC7 — Asphalt
PC8 / sqrt_PC8 — Zinc tile
PC9 / sqrt_PC9 — Shade
PC10 / sqrt_PC10 — Ceramic tile
Each worksheet contains regression model summaries with the following columns:
Model: Identifier of the fitted model, indicating the spatial buffer used, the response variable, and the set of covariates included.
Intercept: Posterior mean estimate of the intercept (expected value of the dependent variable when all covariates are equal to zero), along with the 95% credible interval.
Covariates (e.g., sqrt_, IBP_num, etc.): Posterior mean estimates of the coefficients for the independent variables, with their respective 95% credible intervals. These represent the direction (positive/negative) and magnitude of the association with the dependent variable.
Range: Posterior mean and 95% credible interval of the spatial range parameter (SPDE), indicating the approximate distance beyond which spatial autocorrelation becomes negligible.
Stdev: Posterior mean and 95% credible interval of the spatial standard deviation parameter (SPDE), representing the magnitude of residual spatial variability captured by the latent Gaussian field. Higher values indicate stronger spatial heterogeneity not explained by the covariates.
DIC (Deviance Information Criterion): Measure of model fit that accounts for model complexity. Lower values indicate a better balance between goodness of fit and parsimony.
WAIC (Watanabe–Akaike Information Criterion): Fully Bayesian criterion for model comparison, with emphasis on predictive performance. Lower values indicate better predictive accuracy.
LPML (Log Pseudo Marginal Likelihood): Measure of overall predictive performance based on CPO. Higher values indicate better predictive ability.
CPO (Conditional Predictive Ordinate, median): Summary of pointwise predictive performance based on leave-one-out cross-validation. Higher values indicate better predictive performance.
cpo_failures: Number of observations for which the CPO could not be reliably estimated (missing or unstable values), potentially indicating model fit issues or numerical instability.
cpo_failure_rate: Proportion of observations with CPO failures. Lower values indicate greater model stability and more reliable predictive inference.
correlation: Pearson correlation between observed and predicted values at the sampled locations. Values closer to 1 indicate better agreement between observed and predicted values.
MAE (Mean Absolute Error): Average absolute difference between observed and predicted values, representing the typical magnitude of prediction errors. Lower values indicate better predictive accuracy.
RMSE (Root Mean Squared Error): Square root of the average squared differences between observed and predicted values. It gives greater weight to large errors, making it sensitive to extreme deviations. Lower values indicate better model performance.
MAE_rel (Relative Mean Absolute Error): The MAE normalized by the mean of the observed values, representing the average prediction error relative to the magnitude of the response variable. It can be interpreted as the typical percentage error. Lower values indicate better predictive accuracy.
RMSE_rel (Relative Root Mean Squared Error): The RMSE normalized by the mean of the observed values, representing the typical prediction error with greater emphasis on large deviations, relative to the magnitude of the response variable. Lower values indicate better model performance.
min_pred: Minimum predicted value over the spatial prediction grid, indicating the lowest estimated intensity of the response variable.
max_pred: Maximum predicted value over the spatial prediction grid, indicating the highest estimated intensity of the response variable.
CV_mean (Coefficient of Variation, mean): Mean coefficient of variation across the prediction grid, representing the average relative uncertainty of the model predictions. Lower values indicate more stable predictions.
CV_q25_q50_q75 (Coefficient of Variation quartiles): First quartile (Q25), median (Q50), and third quartile (Q75) of the coefficient of variation across the prediction grid, summarizing the distribution of relative uncertainty.
CV_high_prop (Proportion of high uncertainty): Proportion of grid cells with coefficient of variation greater than 0.7, representing the spatial extent of high prediction uncertainty. Lower values indicate a more reliable prediction surface.
Time: Total model execution time (in seconds).
non_zero_CrI: Indicator of whether the 95% credible intervals for all coefficients (including the intercept) exclude zero.
"yes": none of the intervals include zero
"no": at least one interval includes zero
model_family: Probability distribution assumed for the response variable (e.g., Poisson or negative binomial).
DIC, WAIC, LPML and CPO-based metrics are computed using the observed data and evaluate overall model fit and predictive performance based on the sampled locations.
Correlation, MAE, RMSE, MAE_rel and RMSE_rel are calculated by comparing observed and predicted values at the sampled locations, providing measures of prediction accuracy.
The coefficient of variation (CV) was calculated as the ratio between the posterior standard deviation and posterior mean prediction for each grid cell.
Spatial prediction summaries (min_pred, max_pred, and CV metrics) were computed using predictions over the continuous spatial prediction grid generated from the fitted SPDE models, representing the range of predicted values and associated uncertainty at unsampled locations.

## Sheet: Table_S4_females_20m
Model	Intercept	sqrt_humid	sqrt_precip	sqrt_temp	IBP_num	sqrt_PC1	sqrt_PC2	sqrt_PC3	sqrt_PC4	sqrt_PC5	sqrt_PC6	sqrt_PC7	sqrt_PC8	sqrt_PC9	sqrt_PC10	Range	Stdev	DIC	WAIC	LPML	CPO_median	cpo_failures	cpo_failure_rate	correlation	MAE	RMSE	MAE_rel	RMSE_rel	min_pred	max_pred	CV_mean	CV_q25_q50_q75	CV_high_prop	Time	non_zero_CrI	model_family
model_20m_f_	1.133_x000D_ (0.996–1.26)	-	-	-	-	-	-	-	-	-	-	-	-	-	-	156.306_x000D_ (50.68–350.113)	1.062_x000D_ (0.516–2.051)	909.941	902.266	-2000.54	0.000260903	27.4327	0.137163	0.989009	1.14305	1.41111	0.31019	0.382933	1.76382	9.68396	0.469308	0.393 / 0.438 / 0.502	0.0501099	82.6427	yes	nbinomial
model_20m_f_sqrt_humid	1.128_x000D_ (0.992–1.255)	-0.043_x000D_ (-0.164–0.078)	-	-	-	-	-	-	-	-	-	-	-	-	-	166.124_x000D_ (54.686–360.166)	1.011_x000D_ (0.524–1.89)	911.453	901.256	-2043.23	0.000148062	31.704	0.15852	0.989032	1.10051	1.35409	0.298646	0.367459	1.79291	10.0227	0.482156	0.407 / 0.453 / 0.518	0.0527591	62.718	no	nbinomial
model_20m_f_sqrt_precip	1.142_x000D_ (1.006–1.268)	-	-0.142_x000D_ (-0.258–-0.026)	-	-	-	-	-	-	-	-	-	-	-	-	157.155_x000D_ (47.196–380.672)	1.055_x000D_ (0.463–2.139)	911.665	905.712	-2062.38	0.000102688	19.8239	0.0991193	0.973108	1.21652	1.50943	0.330128	0.409614	1.77262	10.021	0.446151	0.375 / 0.417 / 0.476	0.0407531	64.0538	yes	nbinomial
model_20m_f_sqrt_temp	1.136_x000D_ (0.998–1.266)	-	-	0.088_x000D_ (-0.031–0.206)	-	-	-	-	-	-	-	-	-	-	-	166.417_x000D_ (50.435–376.193)	1.012_x000D_ (0.502–1.961)	912.653	903.296	-1967.26	0.000179038	28.2814	0.141407	0.984577	1.13106	1.39357	0.306935	0.378175	1.86014	10.2447	0.473562	0.401 / 0.446 / 0.508	0.0483062	52.8223	no	nbinomial
model_20m_f_IBP_num	1.515_x000D_ (1.242–1.78)	-	-	-	0.187_x000D_ (0.068–0.307)	-	-	-	-	-	-	-	-	-	-	135.184_x000D_ (41.937–292.441)	1.147_x000D_ (0.556–2.322)	906.629	897.656	-1857.45	0.000283127	25.6077	0.128038	0.97143	1.12725	1.4058	0.305903	0.381493	1.7007	11.0071	0.456729	0.379 / 0.423 / 0.487	0.0488698	49.6101	yes	nbinomial
model_20m_f_sqrt_PC1	1.127_x000D_ (0.992–1.255)	-	-	-	-	0.045_x000D_ (-0.071–0.163)	-	-	-	-	-	-	-	-	-	160.421_x000D_ (50.89–364.106)	1.051_x000D_ (0.506–2.041)	908.379	900.278	-1995.71	0.00015181	27.0034	0.135017	0.988841	1.09024	1.34356	0.295859	0.364603	1.74287	9.70264	0.487826	0.409 / 0.457 / 0.523	0.0571557	38.0935	no	nbinomial
model_20m_f_sqrt_PC2	1.13_x000D_ (0.994–1.256)	-	-	-	-	-	0.127_x000D_ (0.013–0.242)	-	-	-	-	-	-	-	-	170.359_x000D_ (57.228–376.254)	0.972_x000D_ (0.496–1.799)	909.063	900.4	-1955.51	0.000251792	27.4842	0.137421	0.980914	1.135	1.39752	0.308007	0.379246	1.67947	8.71052	0.468278	0.397 / 0.441 / 0.503	0.0458824	39.7167	yes	nbinomial
model_20m_f_sqrt_PC3	1.127_x000D_ (0.994–1.253)	-	-	-	-	-	-	0.091_x000D_ (-0.025–0.207)	-	-	-	-	-	-	-	141.773_x000D_ (47.618–314.956)	1.143_x000D_ (0.537–2.234)	906.755	899.113	-1951.76	0.000147054	28.7404	0.143702	0.985165	1.08757	1.33708	0.295135	0.362843	1.63133	12.9325	0.481975	0.399 / 0.447 / 0.514	0.0587904	63.4372	no	nbinomial
model_20m_f_sqrt_PC4	1.127_x000D_ (0.991–1.254)	-	-	-	-	-	-	-	-0.009_x000D_ (-0.126–0.109)	-	-	-	-	-	-	158.484_x000D_ (51.872–344.615)	1.055_x000D_ (0.536–2)	910.65	900.567	-2046.92	0.000179746	32.6683	0.163341	0.989683	1.09213	1.33998	0.29637	0.363631	1.7298	9.95652	0.485326	0.406 / 0.454 / 0.522	0.0565921	72.7673	no	nbinomial
model_20m_f_sqrt_PC5	1.132_x000D_ (0.997–1.258)	-	-	-	-	-	-	-	-	-0.119_x000D_ (-0.238–0)	-	-	-	-	-	142.253_x000D_ (47.706–304.865)	1.111_x000D_ (0.553–2.15)	908.511	901.4	-1968.08	0.000450898	25.5672	0.127836	0.983108	1.14302	1.41824	0.310182	0.384869	1.51754	10.9215	0.465284	0.387 / 0.433 / 0.497	0.0505608	49.5959	no	nbinomial
model_20m_f_sqrt_PC6	1.132_x000D_ (0.995–1.259)	-	-	-	-	-	-	-	-	-	0.04_x000D_ (-0.076–0.156)	-	-	-	-	154.597_x000D_ (50.259–345.931)	1.075_x000D_ (0.521–2.08)	911.551	903.467	-2067.31	0.00016193	26.8484	0.134242	0.98824	1.14187	1.41453	0.309869	0.38386	1.73453	9.31794	0.474618	0.398 / 0.443 / 0.508	0.0523082	44.1115	no	nbinomial
model_20m_f_sqrt_PC7	1.131_x000D_ (0.996–1.257)	-	-	-	-	-	-	-	-	-	-	-0.108_x000D_ (-0.224–0.008)	-	-	-	161.678_x000D_ (58.796–348.441)	1.009_x000D_ (0.519–1.834)	908.775	900.65	-1987.06	0.000248486	28.3911	0.141956	0.983884	1.1335	1.38649	0.307599	0.376254	1.60588	10.0464	0.470927	0.396 / 0.442 / 0.505	0.0493771	483.406	no	nbinomial
model_20m_f_sqrt_PC8	1.124_x000D_ (0.992–1.25)	-	-	-	-	-	-	-	-	-	-	-	0.028_x000D_ (-0.089–0.144)	-	-	160.691_x000D_ (53.073–366.573)	1.059_x000D_ (0.508–2.016)	908.076	898.707	-2003.51	0.000201609	37.0017	0.185009	0.989434	1.06953	1.31476	0.29024	0.356786	1.70105	10.3964	0.487569	0.409 / 0.457 / 0.523	0.057043	53.0809	no	nbinomial
model_20m_f_sqrt_PC9	1.13_x000D_ (0.994–1.257)	-	-	-	-	-	-	-	-	-	-	-	-	0.103_x000D_ (-0.008–0.215)	-	165.677_x000D_ (54.124–373.165)	1.011_x000D_ (0.501–1.915)	909.501	900.552	-1947.69	0.000366309	27.0661	0.135331	0.983848	1.12111	1.38999	0.304235	0.377201	1.75958	11.7056	0.474568	0.399 / 0.445 / 0.51	0.0505045	64.0793	no	nbinomial
model_20m_f_sqrt_PC10	1.128_x000D_ (0.993–1.255)	-	-	-	-	-	-	-	-	-	-	-	-	-	-0.046_x000D_ (-0.162–0.07)	155.438_x000D_ (51.388–331.528)	1.059_x000D_ (0.546–2.007)	909.749	900.98	-2038.31	0.000138772	32.0561	0.16028	0.988443	1.10193	1.36085	0.299031	0.369294	1.63898	9.91146	0.482166	0.405 / 0.452 / 0.517	0.0542247	59.7425	no	nbinomial

## Sheet: Table_S5_females_30m
Model	Intercept	sqrt_humid	sqrt_precip	sqrt_temp	IBP_num	sqrt_PC1	sqrt_PC2	sqrt_PC3	sqrt_PC4	sqrt_PC5	sqrt_PC6	sqrt_PC7	sqrt_PC8	sqrt_PC9	sqrt_PC10	Range	Stdev	DIC	WAIC	LPML	CPO_median	cpo_failures	cpo_failure_rate	correlation	MAE	RMSE	MAE_rel	RMSE_rel	min_pred	max_pred	CV_mean	CV_q25_q50_q75	CV_high_prop	Time	non_zero_CrI	model_family
model_30m_f_	1.128_x000D_ (0.994–1.255)	-	-	-	-	-	-	-	-	-	-	-	-	-	-	159.256_x000D_ (52.88–341.237)	1.038_x000D_ (0.537–1.953)	909.717	899.847	-1996.94	0.000162833	32.978	0.16489	0.989594	1.09934	1.34909	0.298328	0.366103	1.73984	9.93536	0.477128	0.401 / 0.447 / 0.512	0.0521955	52.1874	yes	nbinomial
model_30m_f_sqrt_humid	1.141_x000D_ (1.007–1.267)	-0.042_x000D_ (-0.163–0.079)	-	-	-	-	-	-	-	-	-	-	-	-	-	158.046_x000D_ (52.107–364.109)	1.058_x000D_ (0.492–2.059)	913.462	906.183	-2313.6	1.64609e-05	20.7343	0.103671	0.987899	1.15315	1.42849	0.312932	0.387651	1.42749	7.76818	0.733774	0.666 / 0.702 / 0.756	0.510118	43.3699	no	nbinomial
model_30m_f_sqrt_precip	1.133_x000D_ (0.999–1.258)	-	-0.142_x000D_ (-0.258–-0.026)	-	-	-	-	-	-	-	-	-	-	-	-	163.016_x000D_ (51.518–359.627)	0.999_x000D_ (0.504–1.915)	910.448	901.09	-1875.09	0.00026045	27.6206	0.138103	0.977703	1.14021	1.40196	0.30942	0.38045	84.2191	1603.12	517.365	491.736 / 522.317 / 538	1	49.0614	yes	nbinomial
model_30m_f_sqrt_temp	1.141_x000D_ (1.002–1.269)	-	-	0.088_x000D_ (-0.03–0.206)	-	-	-	-	-	-	-	-	-	-	-	160.789_x000D_ (51.538–361.828)	1.013_x000D_ (0.491–1.968)	912.521	906.868	-2167.56	6.91004e-05	14.8631	0.0743155	0.982148	1.1954	1.48399	0.324397	0.402712	2.78919	13.7291	0.567973	0.505 / 0.541 / 0.594	0.0781805	40.9561	no	nbinomial
model_30m_f_IBP_num	1.513_x000D_ (1.239–1.78)	-	-	-	0.187_x000D_ (0.067–0.307)	-	-	-	-	-	-	-	-	-	-	134.93_x000D_ (39.698–298.324)	1.159_x000D_ (0.548–2.403)	904.721	897.222	-1864.15	0.000232016	24.0734	0.120367	0.972143	1.12153	1.39807	0.30435	0.379395	1.6968	10.9628	0.461617	0.383 / 0.428 / 0.492	0.0503917	43.1185	yes	nbinomial
model_30m_f_sqrt_PC1	1.126_x000D_ (0.992–1.253)	-	-	-	-	0.033_x000D_ (-0.084–0.151)	-	-	-	-	-	-	-	-	-	161.343_x000D_ (53.834–350.8)	1.035_x000D_ (0.526–1.948)	908.014	899.521	-1984.12	0.00018866	33.6672	0.168336	0.989433	1.08335	1.33089	0.293988	0.361165	1.87565	10.1966	0.508187	0.426 / 0.48 / 0.551	0.0685982	65.3201	no	nbinomial
model_30m_f_sqrt_PC2	1.124_x000D_ (0.995–1.248)	-	-	-	-	-	0.18_x000D_ (0.066–0.295)	-	-	-	-	-	-	-	-	152.491_x000D_ (53.108–329.137)	1.028_x000D_ (0.517–1.928)	901.439	894.166	-1828.82	0.000217601	19.263	0.0963148	0.975896	1.09326	1.34798	0.296677	0.365803	2.13147	37.9886	0.552935	0.435 / 0.51 / 0.63	0.168311	46.2401	yes	nbinomial
model_30m_f_sqrt_PC3	1.129_x000D_ (0.996–1.254)	-	-	-	-	-	-	0.119_x000D_ (0.004–0.234)	-	-	-	-	-	-	-	144.268_x000D_ (48.098–306.493)	1.103_x000D_ (0.556–2.126)	908.787	899.572	-1952.57	0.000199169	29.2991	0.146495	0.982569	1.11091	1.36424	0.301468	0.370216	2.12635	31.0193	0.52316	0.427 / 0.491 / 0.577	0.0893411	47.3979	yes	nbinomial
model_30m_f_sqrt_PC4	1.127_x000D_ (0.992–1.254)	-	-	-	-	-	-	-	-0.016_x000D_ (-0.134–0.102)	-	-	-	-	-	-	158.326_x000D_ (52.145–339.731)	1.048_x000D_ (0.54–1.983)	910.65	900.636	-2042.26	0.000165355	33.9275	0.169638	0.989584	1.0904	1.33935	0.295902	0.36346	1.7239	9.89894	0.480865	0.404 / 0.451 / 0.516	0.0541683	48.7249	no	nbinomial
model_30m_f_sqrt_PC5	1.136_x000D_ (1–1.261)	-	-	-	-	-	-	-	-	-0.152_x000D_ (-0.271–-0.033)	-	-	-	-	-	138.199_x000D_ (46.546–309.077)	1.135_x000D_ (0.532–2.252)	906.462	901.884	-1981.42	0.000460076	14.8299	0.0741496	0.977373	1.17389	1.46291	0.318558	0.39699	0.706213	9.46235	0.487667	0.396 / 0.453 / 0.535	0.0685418	55.824	yes	nbinomial
model_30m_f_sqrt_PC6	1.133_x000D_ (0.996–1.26)	-	-	-	-	-	-	-	-	-	0.017_x000D_ (-0.1–0.134)	-	-	-	-	155.152_x000D_ (52.407–347.425)	1.07_x000D_ (0.516–2.039)	911.894	903.946	-2097.32	0.000186371	27.0782	0.135391	0.988655	1.14565	1.41778	0.310896	0.384743	1.82499	10.1102	0.557996	0.433 / 0.508 / 0.635	0.178513	41.6676	no	nbinomial
model_30m_f_sqrt_PC7	1.134_x000D_ (1–1.258)	-	-	-	-	-	-	-	-	-	-	-0.158_x000D_ (-0.273–-0.044)	-	-	-	156.285_x000D_ (53.984–334.889)	1.008_x000D_ (0.512–1.894)	908.073	900.04	-1892.52	0.0003179	25.6459	0.12823	0.975915	1.15424	1.41496	0.313228	0.383978	0.688393	7.13749	0.529698	0.443 / 0.508 / 0.583	0.0772786	44.5824	yes	nbinomial
model_30m_f_sqrt_PC8	1.126_x000D_ (0.991–1.254)	-	-	-	-	-	-	-	-	-	-	-	0.016_x000D_ (-0.101–0.135)	-	-	160.437_x000D_ (52.181–360.809)	1.05_x000D_ (0.513–2.006)	909.661	900.663	-1991.94	0.000175734	32.8695	0.164347	0.989472	1.09242	1.345	0.296451	0.364992	1.7602	10.3813	0.503861	0.419 / 0.472 / 0.547	0.0686545	62.0216	no	nbinomial
model_30m_f_sqrt_PC9	1.126_x000D_ (0.993–1.253)	-	-	-	-	-	-	-	-	-	-	-	-	0.118_x000D_ (0.007–0.23)	-	153.581_x000D_ (50.099–333.259)	1.058_x000D_ (0.531–2.03)	906.633	897.82	-1900.66	0.000216758	32.5001	0.1625	0.98351	1.10102	1.3533	0.298783	0.367246	1.88684	10.5126	0.475754	0.4 / 0.446 / 0.51	0.05135	738.095	yes	nbinomial
model_30m_f_sqrt_PC10	1.135_x000D_ (0.996–1.265)	-	-	-	-	-	-	-	-	-	-	-	-	-	-0.051_x000D_ (-0.168–0.066)	154.035_x000D_ (51.468–338.649)	1.065_x000D_ (0.527–2.03)	909.99	901.905	-1971.93	0.000226632	25.0199	0.1251	0.987867	1.10171	1.36228	0.298973	0.369683	1.40955	9.31072	0.513348	0.427 / 0.483 / 0.56	0.0689927	132.461	no	nbinomial

## Sheet: Table_S6_females_50m
Model	Intercept	sqrt_humid	sqrt_precip	sqrt_temp	IBP_num	sqrt_PC1	sqrt_PC2	sqrt_PC3	sqrt_PC4	sqrt_PC5	sqrt_PC6	sqrt_PC7	sqrt_PC8	sqrt_PC9	sqrt_PC10	Range	Stdev	DIC	WAIC	LPML	CPO_median	cpo_failures	cpo_failure_rate	correlation	MAE	RMSE	MAE_rel	RMSE_rel	min_pred	max_pred	CV_mean	CV_q25_q50_q75	CV_high_prop	Time	non_zero_CrI	model_family
model_50m_f_	1.13_x000D_ (0.993–1.259)	-	-	-	-	-	-	-	-	-	-	-	-	-	-	158.941_x000D_ (47.642–366.843)	1.07_x000D_ (0.508–2.117)	910.502	901.654	-1990.42	0.000330158	26.8551	0.134276	0.989761	1.12151	1.38174	0.304344	0.374964	1.76233	9.7854	0.477699	0.401 / 0.447 / 0.512	0.0522518	53.1257	yes	nbinomial
model_50m_f_sqrt_humid	1.125_x000D_ (0.991–1.252)	-0.044_x000D_ (-0.165–0.077)	-	-	-	-	-	-	-	-	-	-	-	-	-	164.85_x000D_ (52.881–367.65)	1.029_x000D_ (0.514–1.955)	909.589	899.866	-1968.14	0.000228897	35.2895	0.176448	0.989127	1.08232	1.32836	0.293709	0.360479	1.37466	7.98202	0.740812	0.673 / 0.71 / 0.765	0.562313	61.0419	no	nbinomial
model_50m_f_sqrt_precip	1.137_x000D_ (1.003–1.262)	-	-0.141_x000D_ (-0.257–-0.025)	-	-	-	-	-	-	-	-	-	-	-	-	159.478_x000D_ (52.837–347.389)	1.003_x000D_ (0.505–1.91)	910.231	903.135	-1905.54	0.000451041	23.9963	0.119982	0.975762	1.17981	1.45689	0.320167	0.395356	98.8542	1816.81	502.485	477.933 / 507.276 / 522.223	1	57.1128	yes	nbinomial
model_50m_f_sqrt_temp	1.13_x000D_ (0.996–1.256)	-	-	0.082_x000D_ (-0.037–0.2)	-	-	-	-	-	-	-	-	-	-	-	160.523_x000D_ (51.571–366.238)	1.043_x000D_ (0.499–2.01)	909.177	900.757	-1934.68	0.000223801	31.8737	0.159368	0.984978	1.10264	1.35417	0.299224	0.367481	2.54876	14.0328	0.587801	0.519 / 0.558 / 0.615	0.103996	68.6137	no	nbinomial
model_50m_f_IBP_num	1.518_x000D_ (1.245–1.784)	-	-	-	0.187_x000D_ (0.068–0.307)	-	-	-	-	-	-	-	-	-	-	135.347_x000D_ (40.246–300.898)	1.159_x000D_ (0.544–2.401)	906.645	899.233	-1850.85	0.000451249	21.1962	0.105981	0.968911	1.15981	1.45237	0.314739	0.394129	1.72262	11.0742	0.450818	0.374 / 0.417 / 0.48	0.0467279	53.4789	yes	nbinomial
model_50m_f_sqrt_PC1	1.134_x000D_ (0.996–1.263)	-	-	-	-	0.09_x000D_ (-0.027–0.208)	-	-	-	-	-	-	-	-	-	168.75_x000D_ (52.447–391.939)	0.997_x000D_ (0.478–1.934)	910.739	903.296	-2066.89	0.000184146	18.0064	0.0900318	0.984744	1.13962	1.41704	0.309259	0.384542	2.12285	11.6605	0.493966	0.417 / 0.467 / 0.533	0.0556338	55.2917	no	nbinomial
model_50m_f_sqrt_PC2	1.125_x000D_ (0.994–1.249)	-	-	-	-	-	0.169_x000D_ (0.055–0.284)	-	-	-	-	-	-	-	-	142.274_x000D_ (47.198–314.019)	1.122_x000D_ (0.537–2.188)	902.254	894.632	-1879.37	0.000219001	30.2764	0.151382	0.978354	1.08522	1.349	0.294498	0.36608	2.39057	28.2172	0.55822	0.444 / 0.516 / 0.625	0.155797	50.6301	yes	nbinomial
model_50m_f_sqrt_PC3	1.129_x000D_ (0.997–1.253)	-	-	-	-	-	-	0.132_x000D_ (0.015–0.248)	-	-	-	-	-	-	-	141.332_x000D_ (46.82–314.768)	1.125_x000D_ (0.526–2.219)	905.639	898.554	-1905.96	0.000186654	26.8026	0.134013	0.980532	1.10317	1.3506	0.299368	0.366514	2.41525	27.5163	0.525094	0.432 / 0.494 / 0.573	0.0812806	52.3587	yes	nbinomial
model_50m_f_sqrt_PC4	1.138_x000D_ (0.999–1.266)	-	-	-	-	-	-	-	0.043_x000D_ (-0.074–0.161)	-	-	-	-	-	-	159.721_x000D_ (51.511–375.798)	1.054_x000D_ (0.482–2.058)	912.879	906.342	-2312.11	8.03147e-06	24.8666	0.124333	0.986929	1.19133	1.47042	0.323291	0.399029	1.83074	9.21359	0.461126	0.387 / 0.431 / 0.494	0.0462206	40.4999	no	nbinomial
model_50m_f_sqrt_PC5	1.14_x000D_ (1.005–1.264)	-	-	-	-	-	-	-	-	-0.205_x000D_ (-0.321–-0.088)	-	-	-	-	-	137.027_x000D_ (40.813–320.714)	1.12_x000D_ (0.489–2.35)	906.077	901.753	-1964.19	0.000341945	10.0961	0.0504806	0.964787	1.20713	1.5144	0.327579	0.410964	0.514244	6.82435	0.46968	0.386 / 0.438 / 0.51	0.0519136	50.7592	yes	nbinomial
model_50m_f_sqrt_PC6	1.128_x000D_ (0.991–1.255)	-	-	-	-	-	-	-	-	-	0.005_x000D_ (-0.114–0.125)	-	-	-	-	158.06_x000D_ (50.604–356.757)	1.076_x000D_ (0.519–2.081)	910.787	901.54	-2055.88	0.000108213	31.5374	0.157687	0.989419	1.1027	1.3567	0.29924	0.368169	1.74815	10.0853	0.573398	0.453 / 0.528 / 0.648	0.183642	47.7734	no	nbinomial
model_50m_f_sqrt_PC7	1.128_x000D_ (0.995–1.254)	-	-	-	-	-	-	-	-	-	-	-0.107_x000D_ (-0.224–0.01)	-	-	-	146.945_x000D_ (47.745–333.924)	1.116_x000D_ (0.517–2.198)	907.415	899.148	-1925	0.000277072	32.6373	0.163186	0.9835	1.10098	1.34924	0.298774	0.366144	1.05033	6.83297	0.553358	0.467 / 0.527 / 0.599	0.0943013	51.7666	no	nbinomial
model_50m_f_sqrt_PC8	1.137_x000D_ (0.998–1.266)	-	-	-	-	-	-	-	-	-	-	-	-0.021_x000D_ (-0.139–0.097)	-	-	152.211_x000D_ (49.516–350.78)	1.088_x000D_ (0.501–2.144)	912.182	906.21	-2272.37	3.36692e-05	17.3626	0.0868128	0.988253	1.17711	1.45532	0.319432	0.39493	1.72578	9.32725	0.486935	0.405 / 0.455 / 0.525	0.0572685	36.3098	no	nbinomial
model_50m_f_sqrt_PC9	1.127_x000D_ (0.993–1.253)	-	-	-	-	-	-	-	-	-	-	-	-	0.136_x000D_ (0.024–0.249)	-	142.049_x000D_ (44.529–319.205)	1.125_x000D_ (0.528–2.259)	905.164	897.797	-1878.14	0.000287606	18.747	0.093735	0.980964	1.10269	1.36651	0.299236	0.37083	1.87733	11.022	0.472162	0.392 / 0.438 / 0.504	0.053661	32.7418	yes	nbinomial
model_50m_f_sqrt_PC10	1.126_x000D_ (0.992–1.253)	-	-	-	-	-	-	-	-	-	-	-	-	-	-0.075_x000D_ (-0.192–0.043)	158.505_x000D_ (52.574–340.623)	1.035_x000D_ (0.535–1.943)	907.599	899.411	-1963.05	0.000161187	27.5008	0.137504	0.98754	1.08076	1.33862	0.293286	0.363261	1.29181	8.71451	0.514204	0.432 / 0.487 / 0.558	0.0667381	41.0758	no	nbinomial

## Sheet: Table_S7_females_100m
Model	Intercept	sqrt_humid	sqrt_precip	sqrt_temp	IBP_num	sqrt_PC1	sqrt_PC2	sqrt_PC3	sqrt_PC4	sqrt_PC5	sqrt_PC6	sqrt_PC7	sqrt_PC8	sqrt_PC9	sqrt_PC10	Range	Stdev	DIC	WAIC	LPML	CPO_median	cpo_failures	cpo_failure_rate	correlation	MAE	RMSE	MAE_rel	RMSE_rel	min_pred	max_pred	CV_mean	CV_q25_q50_q75	CV_high_prop	Time	non_zero_CrI	model_family
model_100m_f_	1.13_x000D_ (0.994–1.257)	-	-	-	-	-	-	-	-	-	-	-	-	-	-	156.621_x000D_ (51.292–346.515)	1.051_x000D_ (0.519–2.012)	908.947	900.875	-1957.45	0.000260342	25.0026	0.125013	0.989351	1.11241	1.36906	0.301875	0.371522	1.73497	9.81565	0.478039	0.4 / 0.447 / 0.513	0.0539992	42.4819	yes	nbinomial
model_100m_f_sqrt_humid	1.132_x000D_ (0.995–1.26)	-0.033_x000D_ (-0.153–0.087)	-	-	-	-	-	-	-	-	-	-	-	-	-	159.756_x000D_ (54.392–354.588)	1.046_x000D_ (0.513–1.98)	911.101	903.487	-2087.71	0.000135082	28.351	0.141755	0.988516	1.14101	1.41056	0.309635	0.382785	1.52533	8.39286	0.729281	0.662 / 0.698 / 0.751	0.486106	48.162	no	nbinomial
model_100m_f_sqrt_precip	1.132_x000D_ (0.998–1.258)	-	-0.136_x000D_ (-0.253–-0.02)	-	-	-	-	-	-	-	-	-	-	-	-	158.555_x000D_ (49.212–369.38)	1.041_x000D_ (0.482–2.055)	908.369	900.883	-1901.09	0.000227056	23.1704	0.115852	0.978468	1.13201	1.39119	0.307193	0.377529	194.945	4016.51	535.497	508.758 / 540.871 / 557.096	1	79.2198	yes	nbinomial
model_100m_f_sqrt_temp	1.15_x000D_ (1.01–1.281)	-	-	0.089_x000D_ (-0.03–0.207)	-	-	-	-	-	-	-	-	-	-	-	167.346_x000D_ (48.49–401.473)	1.003_x000D_ (0.461–2.036)	914.672	911.707	-2508.82	5.97743e-07	2.7834	0.013917	0.979615	1.2619	1.5765	0.342441	0.427815	2.89479	13.2505	0.556615	0.497 / 0.53 / 0.58	0.0652725	40.074	no	nbinomial
model_100m_f_IBP_num	1.51_x000D_ (1.239–1.776)	-	-	-	0.187_x000D_ (0.068–0.307)	-	-	-	-	-	-	-	-	-	-	132.785_x000D_ (42.471–298.488)	1.176_x000D_ (0.536–2.384)	900.877	894.116	-1742.91	0.000293356	9.29328	0.0464664	0.973523	1.08657	1.34918	0.294864	0.366127	1.65945	11.2689	0.466263	0.384 / 0.43 / 0.497	0.0533228	50.5113	yes	nbinomial
model_100m_f_sqrt_PC1	1.134_x000D_ (0.996–1.262)	-	-	-	-	0.064_x000D_ (-0.056–0.183)	-	-	-	-	-	-	-	-	-	164.176_x000D_ (54.962–362.749)	1.012_x000D_ (0.503–1.917)	912.149	903.775	-2063.65	0.000223972	25.6147	0.128073	0.986366	1.13852	1.41137	0.308961	0.383004	2.13995	10.9612	0.49591	0.419 / 0.468 / 0.534	0.0568175	46.8644	no	nbinomial
model_100m_f_sqrt_PC2	1.133_x000D_ (0.998–1.258)	-	-	-	-	-	0.135_x000D_ (0.021–0.25)	-	-	-	-	-	-	-	-	152.02_x000D_ (51.12–333.803)	1.054_x000D_ (0.52–2.014)	908.266	900.397	-1904.69	0.000637651	25.8377	0.129188	0.980011	1.13372	1.40551	0.307657	0.381414	2.46597	18.1395	0.553133	0.452 / 0.518 / 0.613	0.126487	48.3187	yes	nbinomial
model_100m_f_sqrt_PC3	1.132_x000D_ (0.999–1.257)	-	-	-	-	-	-	0.151_x000D_ (0.033–0.269)	-	-	-	-	-	-	-	136.464_x000D_ (42.996–296.813)	1.148_x000D_ (0.554–2.305)	909.054	899.88	-1891.8	0.000281922	25.6594	0.128297	0.978196	1.12379	1.38811	0.304965	0.376692	2.83982	19.0232	0.517278	0.431 / 0.487 / 0.558	0.0679781	45.2799	yes	nbinomial
model_100m_f_sqrt_PC4	1.125_x000D_ (0.993–1.251)	-	-	-	-	-	-	-	-0.031_x000D_ (-0.153–0.09)	-	-	-	-	-	-	153.969_x000D_ (51.439–326.156)	1.07_x000D_ (0.547–2.04)	906.687	898.9	-2048.42	0.00012646	30.4935	0.152468	0.989755	1.0754	1.32375	0.291831	0.359226	1.67463	10.0471	0.482916	0.404 / 0.451 / 0.518	0.0565357	45.3291	no	nbinomial
model_100m_f_sqrt_PC5	1.126_x000D_ (0.996–1.251)	-	-	-	-	-	-	-	-	-0.172_x000D_ (-0.29–-0.053)	-	-	-	-	-	140.897_x000D_ (42.458–314.17)	1.126_x000D_ (0.535–2.286)	903.291	895.864	-1842.59	0.000191121	26.177	0.130885	0.978029	1.08589	1.3526	0.294679	0.367056	0.777013	6.05367	0.503924	0.421 / 0.473 / 0.543	0.064427	72.3986	yes	nbinomial
model_100m_f_sqrt_PC6	1.141_x000D_ (1.006–1.268)	-	-	-	-	-	-	-	-	-	-0.01_x000D_ (-0.13–0.111)	-	-	-	-	156.126_x000D_ (50.482–358.015)	1.069_x000D_ (0.504–2.081)	912.538	906.645	-2301.1	2.11747e-05	20.1504	0.100752	0.988743	1.16714	1.44362	0.316729	0.391756	1.75828	9.46481	0.563992	0.454 / 0.524 / 0.629	0.156136	141.594	no	nbinomial
model_100m_f_sqrt_PC7	1.129_x000D_ (0.994–1.256)	-	-	-	-	-	-	-	-	-	-	-0.077_x000D_ (-0.195–0.04)	-	-	-	153.488_x000D_ (49.102–345.489)	1.081_x000D_ (0.519–2.106)	909.149	900.621	-1964.5	0.000208119	31.1066	0.155533	0.985543	1.10365	1.35646	0.299499	0.368103	1.22274	7.18472	0.556404	0.475 / 0.531 / 0.597	0.0918212	57.9376	no	nbinomial
model_100m_f_sqrt_PC8	1.131_x000D_ (0.994–1.258)	-	-	-	-	-	-	-	-	-	-	-	0.009_x000D_ (-0.107–0.125)	-	-	156.737_x000D_ (59.057–325.688)	1.033_x000D_ (0.545–1.856)	911.069	902.67	-2075.2	0.000153341	28.8211	0.144106	0.989135	1.12446	1.38672	0.305146	0.376316	1.79112	9.96541	0.494945	0.416 / 0.466 / 0.533	0.0579449	48.2696	no	nbinomial
model_100m_f_sqrt_PC9	1.129_x000D_ (0.994–1.256)	-	-	-	-	-	-	-	-	-	-	-	-	0.121_x000D_ (0.008–0.235)	-	151.942_x000D_ (49.779–330.376)	1.066_x000D_ (0.528–2.066)	908.328	900.201	-1961.26	0.000266001	27.2664	0.136332	0.981875	1.12216	1.39898	0.304522	0.379641	1.92096	11.6102	0.468361	0.392 / 0.437 / 0.501	0.0500535	45.3181	yes	nbinomial
model_100m_f_sqrt_PC10	1.146_x000D_ (1.012–1.273)	-	-	-	-	-	-	-	-	-	-	-	-	-	-0.13_x000D_ (-0.246–-0.013)	151.517_x000D_ (49.804–340.071)	1.055_x000D_ (0.502–2.075)	912.631	907.221	-2198.39	3.36872e-05	24.9008	0.124504	0.97525	1.2239	1.5479	0.332129	0.420055	1.15709	5.83274	0.473484	0.398 / 0.446 / 0.509	0.0466716	62.3052	yes	nbinomial
