# Supplementary material
Source: Research Square preprint supplement (doi:10.21203/rs.3.rs-9762487/v1)
Supplement: Supplementary file 7 [file b5407705b491574087db35c4.xlsx]

## Sheet: Read Me
Read me
Each worksheet is labeled according to the buffer radius used. Within each worksheet, regression models are identified by the covariates included. Models are further characterized by the buffer radius used for spatial aggregation of covariates (20, 30, 50, and 100 m).
The prefix “PC_” indicates that the covariate represents the percentage of a given land-use and land-cover class within the buffer. The prefix “sqrt_PC” indicates square-root of the percentage of each variable. Land-use and land-cover classes were maintained as coded categories to facilitate data organization.
Variables:
IBP_num — IBP index
humidity — relative humidity (%)
precipitation — precipitation (mm)
temperature — temperature (°C)
sqrt_humid — square-root transformation of humidity
sqrt_precip — square-root transformation of precipitation
sqrt_temp — square-root transformation of temperature
Land-use and land-cover variables:
PC1 / sqrt_PC1 — Cement
PC2 / sqrt_PC2 — Tree
PC3 / sqrt_PC3 — Asbestos tile
PC4 / sqrt_PC4 — Swimming pool
PC5 / sqrt_PC5 — Exposed soil
PC6 / sqrt_PC6 — Grass
PC7 / sqrt_PC7 — Asphalt
PC8 / sqrt_PC8 — Zinc tile
PC9 / sqrt_PC9 — Shade
PC10 / sqrt_PC10 — Ceramic tile
Each worksheet contains regression model summaries with the following columns:
Model: Identifier of the fitted model, indicating the spatial buffer used, the response variable, and the set of covariates included.
Intercept: Posterior mean estimate of the intercept (expected value of the dependent variable when all covariates are equal to zero), along with the 95% credible interval.
Covariates (e.g., sqrt_, IBP_num, etc.): Posterior mean estimates of the coefficients for the independent variables, with their respective 95% credible intervals. These represent the direction (positive/negative) and magnitude of the association with the dependent variable.
Range: Posterior mean and 95% credible interval of the spatial range parameter (SPDE), indicating the approximate distance beyond which spatial autocorrelation becomes negligible.
Stdev: Posterior mean and 95% credible interval of the spatial standard deviation parameter (SPDE), representing the magnitude of residual spatial variability captured by the latent Gaussian field. Higher values indicate stronger spatial heterogeneity not explained by the covariates.
DIC (Deviance Information Criterion): Measure of model fit that accounts for model complexity. Lower values indicate a better balance between goodness of fit and parsimony.
WAIC (Watanabe–Akaike Information Criterion): Fully Bayesian criterion for model comparison, with emphasis on predictive performance. Lower values indicate better predictive accuracy.
LPML (Log Pseudo Marginal Likelihood): Measure of overall predictive performance based on CPO. Higher values indicate better predictive ability.
CPO (Conditional Predictive Ordinate, median): Summary of pointwise predictive performance based on leave-one-out cross-validation. Higher values indicate better predictive performance.
cpo_failures: Number of observations for which the CPO could not be reliably estimated (missing or unstable values), potentially indicating model fit issues or numerical instability.
cpo_failure_rate: Proportion of observations with CPO failures. Lower values indicate greater model stability and more reliable predictive inference.
correlation: Pearson correlation between observed and predicted values at the sampled locations. Values closer to 1 indicate better agreement between observed and predicted values.
MAE (Mean Absolute Error): Average absolute difference between observed and predicted values, representing the typical magnitude of prediction errors. Lower values indicate better predictive accuracy.
RMSE (Root Mean Squared Error): Square root of the average squared differences between observed and predicted values. It gives greater weight to large errors, making it sensitive to extreme deviations. Lower values indicate better model performance.
MAE_rel (Relative Mean Absolute Error): The MAE normalized by the mean of the observed values, representing the average prediction error relative to the magnitude of the response variable. It can be interpreted as the typical percentage error. Lower values indicate better predictive accuracy.
RMSE_rel (Relative Root Mean Squared Error): The RMSE normalized by the mean of the observed values, representing the typical prediction error with greater emphasis on large deviations, relative to the magnitude of the response variable. Lower values indicate better model performance.
min_pred: Minimum predicted value over the spatial prediction grid, indicating the lowest estimated intensity of the response variable.
max_pred: Maximum predicted value over the spatial prediction grid, indicating the highest estimated intensity of the response variable.
CV_mean (Coefficient of Variation, mean): Mean coefficient of variation across the prediction grid, representing the average relative uncertainty of the model predictions. Lower values indicate more stable predictions.
CV_q25_q50_q75 (Coefficient of Variation quartiles): First quartile (Q25), median (Q50), and third quartile (Q75) of the coefficient of variation across the prediction grid, summarizing the distribution of relative uncertainty.
CV_high_prop (Proportion of high uncertainty): Proportion of grid cells with coefficient of variation greater than 0.7, representing the spatial extent of high prediction uncertainty. Lower values indicate a more reliable prediction surface.
Time: Total model execution time (in seconds).
non_zero_CrI: Indicator of whether the 95% credible intervals for all coefficients (including the intercept) exclude zero.
"yes": none of the intervals include zero
"no": at least one interval includes zero
model_family: Probability distribution assumed for the response variable (e.g., Poisson or negative binomial).
DIC, WAIC, LPML and CPO-based metrics are computed using the observed data and evaluate overall model fit and predictive performance based on the sampled locations.
Correlation, MAE, RMSE, MAE_rel and RMSE_rel are calculated by comparing observed and predicted values at the sampled locations, providing measures of prediction accuracy.
The coefficient of variation (CV) was calculated as the ratio between the posterior standard deviation and posterior mean prediction for each grid cell.
Spatial prediction summaries (min_pred, max_pred, and CV metrics) were computed using predictions over the continuous spatial prediction grid generated from the fitted SPDE models, representing the range of predicted values and associated uncertainty at unsampled locations.

## Sheet: Table_S24_culex_20m
Model	Intercept	IBP_num	sqrt_precip	sqrt_temp	sqrt_PC2	sqrt_PC6	sqrt_PC9	Range	Stdev	DIC	WAIC	LPML	CPO_median	cpo_failures	cpo_failure_rate	correlation	MAE	RMSE	MAE_rel	RMSE_rel	min_pred	max_pred	CV_mean	CV_q25_q50_q75	CV_high_prop	Time	non_zero_CrI	model_family
model_20m_clx_	1.374_x000D_ (1.117–1.628)	-	-	-	-	-	-	1045.709_x000D_ (918.424–1189.232)	1.108_x000D_ (0.992–1.217)	1068.8	1059.58	-875.074	0.0392518	0	0	0.992594	1.94143	7.43628	0.201812	0.773002	0.935216	187.422	1.14494	0.962 / 1.195 / 1.375	0.906826	44.4911	yes	nbinomial
model_20m_clx_IBP_num	2.048_x000D_ (1.562–2.517)	0.331_x000D_ (0.119–0.539)	-	-	-	-	-	810.137_x000D_ (638.024–1131.376)	1.013_x000D_ (0.884–1.137)	1071.38	1060.62	-960.718	0.0372859	0	0	0.995987	1.86305	6.55765	0.193665	0.681669	1.00389	199.301	1.07666	0.973 / 1.13 / 1.231	0.91235	29.6457	yes	nbinomial
model_20m_clx_sqrt_precip	1.389_x000D_ (1.153–1.622)	-	-0.397_x000D_ (-0.643–-0.152)	-	-	-	-	932.239_x000D_ (769.846–1136.452)	1.027_x000D_ (0.892–1.166)	1070.86	1060.79	-841.285	0.0454102	0	0	0.992338	2.0158	7.67073	0.209543	0.797373	1.10571	186.32	1.07724	0.938 / 1.129 / 1.261	0.902768	37.059	yes	nbinomial
model_20m_clx_sqrt_temp	1.388_x000D_ (1.166–1.606)	-	-	0.476_x000D_ (0.258–0.694)	-	-	-	837.688_x000D_ (652.15–1093.14)	0.99_x000D_ (0.863–1.135)	1066.47	1056.44	-872.215	0.0419829	0	0	0.993776	1.9516	7.22763	0.202869	0.751313	1.10151	183.037	1.03072	0.924 / 1.08 / 1.183	0.899611	29.3231	yes	nbinomial
model_20m_clx_sqrt_PC2	1.384_x000D_ (1.117–1.649)	-	-	-	0.162_x000D_ (0.006–0.318)	-	-	1165.68_x000D_ (981.261–1364.781)	1.1_x000D_ (0.966–1.227)	1073.7	1066.46	-805.177	0.048267	0	0	0.988677	2.15475	8.31889	0.223987	0.864749	0.838512	145.901	1.11847	0.919 / 1.15 / 1.356	0.895947	38.8045	yes	nbinomial
model_20m_clx_sqrt_PC6	1.382_x000D_ (1.116–1.651)	-	-	-	-	-0.147_x000D_ (-0.313–0.018)	-	1118.267_x000D_ (963.916–1286.056)	1.116_x000D_ (1.005–1.249)	1061.1	1053.06	-1066.16	0.0306825	0	0	0.994456	1.84969	6.80421	0.192276	0.707298	0.783399	181.747	1.13655	0.94 / 1.177 / 1.38	0.89978	47.9714	no	nbinomial
model_20m_clx_sqrt_PC9	1.385_x000D_ (1.131–1.637)	-	-	-	-	-	0.173_x000D_ (0.017–0.331)	1038.948_x000D_ (829.652–1271.167)	1.084_x000D_ (0.95–1.227)	1068.6	1059.18	-858.901	0.0448766	0	0	0.991064	1.96633	7.937	0.2044	0.825052	0.906653	185.324	1.11733	0.947 / 1.165 / 1.333	0.905022	47.9466	yes	nbinomial
model_20m_clx_IBP_num_sqrt_precip	1.832_x000D_ (1.339–2.316)	0.218_x000D_ (0–0.435)	-0.291_x000D_ (-0.54–-0.046)	-	-	-	-	813.761_x000D_ (670.047–986.787)	1.004_x000D_ (0.888–1.141)	1066.16	1057.55	-896.31	0.0390856	0	0	0.995253	1.88669	6.74524	0.196121	0.701169	1.07367	197.25	1.04055	0.935 / 1.091 / 1.193	0.902599	40.9674	no	nbinomial
model_20m_clx_IBP_num_sqrt_temp	1.842_x000D_ (1.373–2.299)	0.234_x000D_ (0.028–0.438)	-	0.398_x000D_ (0.187–0.61)	-	-	-	628.214_x000D_ (465.905–814.251)	0.981_x000D_ (0.86–1.12)	1042	1037.84	-1882.4	8.53336e-05	0	0	0.998541	1.42806	4.34559	0.148447	0.451725	1.06027	211.594	1.01084	0.937 / 1.049 / 1.138	0.903331	44.6546	yes	nbinomial
model_20m_clx_IBP_num_sqrt_PC2	2.035_x000D_ (1.546–2.509)	0.336_x000D_ (0.122–0.547)	-	-	0.173_x000D_ (0.013–0.334)	-	-	673.384_x000D_ (435.881–951.021)	1.028_x000D_ (0.876–1.202)	1068.71	1045.1	-2265.55	2.02678e-05	0	0	0.998268	1.45618	4.40087	0.15137	0.45747	0.912694	159.781	1.08851	0.977 / 1.143 / 1.253	0.910772	34.345	yes	nbinomial
model_20m_clx_IBP_num_sqrt_PC6	2.025_x000D_ (1.514–2.511)	0.324_x000D_ (0.103–0.539)	-	-	-	-0.137_x000D_ (-0.306–0.031)	-	803.292_x000D_ (481.3–1232.671)	1.045_x000D_ (0.895–1.219)	1054.2	1046.8	-1937.29	0.000129939	0	0	0.998265	1.54031	4.80999	0.160115	0.499999	0.921369	202.676	1.10497	0.987 / 1.16 / 1.276	0.91421	43.9478	no	nbinomial
model_20m_clx_IBP_num_sqrt_PC9	1.956_x000D_ (1.476–2.427)	0.285_x000D_ (0.074–0.494)	-	-	-	-	0.14_x000D_ (-0.023–0.304)	791.208_x000D_ (624.586–986.461)	1.016_x000D_ (0.892–1.158)	1065.69	1056.43	-983.685	0.0354451	0	0	0.995727	1.80646	6.62629	0.187782	0.688803	0.987979	200.067	1.06481	0.963 / 1.116 / 1.214	0.912012	31.9034	no	nbinomial
model_20m_clx_IBP_num_sqrt_precip_sqrt_temp	1.895_x000D_ (1.412–2.369)	0.255_x000D_ (0.039–0.469)	0.135_x000D_ (-0.226–0.497)	0.498_x000D_ (0.159–0.841)	-	-	-	604.066_x000D_ (430.795–800.875)	0.992_x000D_ (0.863–1.138)	1067.64	1058.24	-1360.39	0.0201275	0	0	0.997739	1.62362	5.22337	0.168775	0.54297	1.0231	202.885	1.02496	0.93 / 1.044 / 1.134	0.902711	30.4102	no	nbinomial
model_20m_clx_IBP_num_sqrt_precip_sqrt_PC2	1.85_x000D_ (1.357–2.335)	0.23_x000D_ (0.013–0.447)	-0.29_x000D_ (-0.54–-0.045)	-	0.17_x000D_ (0.012–0.329)	-	-	816.961_x000D_ (678.416–990.49)	0.995_x000D_ (0.874–1.117)	1066.25	1056.42	-870.983	0.039327	0	0	0.995468	1.84178	6.47443	0.191453	0.673017	1.03659	146.823	1.0451	0.938 / 1.095 / 1.198	0.905248	31.7458	yes	nbinomial
model_20m_clx_IBP_num_sqrt_precip_sqrt_PC6	1.849_x000D_ (1.352–2.338)	0.224_x000D_ (0.006–0.442)	-0.283_x000D_ (-0.532–-0.038)	-	-	-0.127_x000D_ (-0.294–0.04)	-	796.529_x000D_ (669.276–966.603)	1.004_x000D_ (0.882–1.129)	1065.68	1055.72	-920.135	0.0387172	0	0	0.996241	1.83674	6.41422	0.190929	0.666759	1.06251	189.72	1.05993	0.956 / 1.111 / 1.212	0.910095	39.7511	no	nbinomial
model_20m_clx_IBP_num_sqrt_precip_sqrt_PC9	1.772_x000D_ (1.272–2.262)	0.187_x000D_ (-0.033–0.405)	-0.272_x000D_ (-0.522–-0.026)	-	-	-	0.119_x000D_ (-0.041–0.28)	819.937_x000D_ (639.854–997.277)	1.011_x000D_ (0.899–1.164)	1064.87	1056.47	-920.502	0.0376679	0	0	0.994589	1.88113	7.0309	0.195543	0.730863	1.06417	195.869	1.03179	0.928 / 1.08 / 1.18	0.902824	35.4244	no	nbinomial
model_20m_clx_IBP_num_sqrt_temp_sqrt_PC2	1.864_x000D_ (1.402–2.314)	0.236_x000D_ (0.032–0.437)	-	0.39_x000D_ (0.179–0.604)	0.162_x000D_ (0.006–0.318)	-	-	681.137_x000D_ (546.5–871.161)	0.99_x000D_ (0.876–1.154)	1070.86	1048.6	-1154.56	0.0274663	0	0	0.996969	1.7117	5.66639	0.177931	0.589022	0.94854	149.989	0.977483	0.901 / 1.016 / 1.102	0.896624	34.4321	yes	nbinomial
model_20m_clx_IBP_num_sqrt_temp_sqrt_PC6	1.839_x000D_ (1.368–2.299)	0.237_x000D_ (0.029–0.443)	-	0.391_x000D_ (0.179–0.605)	-	-0.113_x000D_ (-0.279–0.053)	-	648.008_x000D_ (489.456–861.83)	0.993_x000D_ (0.87–1.124)	1037.31	1030.14	-2088.62	3.05533e-05	0	0	0.999128	1.26227	3.46507	0.131213	0.360194	1.06425	209.243	1.03538	0.958 / 1.074 / 1.167	0.908517	56.5781	no	nbinomial
model_20m_clx_IBP_num_sqrt_temp_sqrt_PC9	1.795_x000D_ (1.329–2.253)	0.199_x000D_ (-0.008–0.404)	-	0.386_x000D_ (0.178–0.596)	-	-	0.121_x000D_ (-0.039–0.282)	682.962_x000D_ (557.049–858.854)	0.98_x000D_ (0.871–1.133)	1074.7	1052.16	-913.086	0.037131	0	0	0.996133	1.79875	6.46824	0.18698	0.672374	1.10651	194.732	0.973273	0.903 / 1.006 / 1.089	0.899498	36.6111	no	nbinomial
model_20m_clx_IBP_num_sqrt_PC2_sqrt_PC6	2.014_x000D_ (1.542–2.478)	0.313_x000D_ (0.11–0.515)	-	-	0.21_x000D_ (0.05–0.371)	-0.185_x000D_ (-0.353–-0.018)	-	907.052_x000D_ (720.033–1093.705)	1.025_x000D_ (0.914–1.161)	1061.54	1053.97	-974.371	0.032998	0	0	0.996491	1.84094	6.08901	0.191366	0.632953	0.619851	167.918	1.06133	0.933 / 1.114 / 1.234	0.904289	36.7874	yes	nbinomial
model_20m_clx_IBP_num_sqrt_PC2_sqrt_PC9	1.942_x000D_ (1.461–2.413)	0.287_x000D_ (0.075–0.497)	-	-	0.184_x000D_ (0.025–0.343)	-	0.156_x000D_ (-0.005–0.318)	737.282_x000D_ (544.509–948.555)	1.02_x000D_ (0.888–1.175)	1056.89	1039.78	-1777.23	0.00176529	0	0	0.998249	1.38442	4.41337	0.143911	0.458771	0.897501	157.837	1.08637	0.977 / 1.141 / 1.247	0.912406	39.4952	no	nbinomial
model_20m_clx_IBP_num_sqrt_PC6_sqrt_PC9	1.935_x000D_ (1.446–2.413)	0.276_x000D_ (0.06–0.489)	-	-	-	-0.131_x000D_ (-0.299–0.037)	0.135_x000D_ (-0.028–0.298)	807.111_x000D_ (607.011–1037.537)	1.044_x000D_ (0.91–1.193)	1069.09	1049.09	-1248.13	0.0258279	0	0	0.997032	1.66119	5.80404	0.172681	0.60333	0.879289	242.52	1.09818	0.98 / 1.153 / 1.265	0.914999	36.2096	no	nbinomial
model_20m_clx_IBP_num_sqrt_precip_sqrt_temp_sqrt_PC2	1.907_x000D_ (1.423–2.379)	0.265_x000D_ (0.05–0.478)	0.129_x000D_ (-0.232–0.487)	0.487_x000D_ (0.148–0.826)	0.161_x000D_ (0.002–0.32)	-	-	652.519_x000D_ (481.935–890.19)	0.987_x000D_ (0.864–1.133)	1062.32	1041.82	-1488.56	0.0122945	0	0	0.998134	1.51677	4.6942	0.157668	0.487962	0.878547	155.407	1.0034	0.926 / 1.041 / 1.13	0.903219	35.8867	no	nbinomial
model_20m_clx_IBP_num_sqrt_precip_sqrt_temp_sqrt_PC6	1.862_x000D_ (1.366–2.348)	0.242_x000D_ (0.023–0.46)	0.123_x000D_ (-0.251–0.495)	0.482_x000D_ (0.131–0.833)	-	-0.115_x000D_ (-0.282–0.051)	-	654.03_x000D_ (446.542–833.465)	0.996_x000D_ (0.868–1.129)	1047.29	1039.03	-1577.23	0.0102264	0	0	0.998393	1.47247	4.5151	0.153063	0.469345	1.00874	199.488	1.04823	0.959 / 1.094 / 1.19	0.908855	43.6793	no	nbinomial
model_20m_clx_IBP_num_sqrt_precip_sqrt_temp_sqrt_PC9	1.803_x000D_ (1.308–2.288)	0.214_x000D_ (-0.006–0.433)	0.159_x000D_ (-0.209–0.525)	0.506_x000D_ (0.162–0.85)	-	-	0.131_x000D_ (-0.031–0.295)	633.263_x000D_ (417.58–814.358)	1.007_x000D_ (0.88–1.146)	1063.62	1039.65	-1664.92	0.0032157	0	0	0.997948	1.48497	4.88711	0.154362	0.508015	1.0068	207.26	1.02962	0.947 / 1.069 / 1.161	0.907446	41.3151	no	nbinomial
model_20m_clx_IBP_num_sqrt_precip_sqrt_PC2_sqrt_PC6	1.841_x000D_ (1.343–2.329)	0.227_x000D_ (0.008–0.446)	-0.29_x000D_ (-0.548–-0.038)	-	0.209_x000D_ (0.048–0.37)	-0.178_x000D_ (-0.347–-0.01)	-	884.668_x000D_ (714.595–1136.709)	0.998_x000D_ (0.876–1.127)	1061.24	1051.88	-943.365	0.0362152	0	0	0.996347	1.81424	6.12722	0.188591	0.636925	0.730343	159.451	1.0571	0.936 / 1.108 / 1.222	0.905811	36.4358	yes	nbinomial
model_20m_clx_IBP_num_sqrt_precip_sqrt_PC2_sqrt_PC9	1.787_x000D_ (1.292–2.275)	0.199_x000D_ (-0.02–0.419)	-0.267_x000D_ (-0.515–-0.022)	-	0.18_x000D_ (0.021–0.339)	-	0.133_x000D_ (-0.029–0.295)	807.218_x000D_ (680.467–964.823)	0.994_x000D_ (0.878–1.115)	1062.59	1052.14	-927.329	0.0351077	0	0	0.995605	1.74146	6.34904	0.181025	0.659983	1.02554	145.883	1.05054	0.946 / 1.1 / 1.201	0.908686	42.329	no	nbinomial
model_20m_clx_IBP_num_sqrt_precip_sqrt_PC6_sqrt_PC9	1.689_x000D_ (1.206–2.171)	0.117_x000D_ (-0.088–0.322)	-0.301_x000D_ (-0.594–-0.008)	-	-	-0.13_x000D_ (-0.281–0.021)	0.102_x000D_ (-0.041–0.245)	1272.679_x000D_ (1226.061–1319.322)	1.005_x000D_ (0.955–1.06)	1070.92	1070.05	-691.95	0.0591019	0	0	0.985001	2.42159	9.39342	0.251724	0.976447	0.818914	170.023	0.977519	0.803 / 0.988 / 1.169	0.848261	48.1393	no	nbinomial
model_20m_clx_IBP_num_sqrt_temp_sqrt_PC2_sqrt_PC6	1.835_x000D_ (1.355–2.302)	0.23_x000D_ (0.02–0.438)	-	0.384_x000D_ (0.164–0.609)	0.2_x000D_ (0.039–0.36)	-0.164_x000D_ (-0.332–0.003)	-	731.548_x000D_ (525.876–972.59)	0.981_x000D_ (0.849–1.128)	1048.81	1036.68	-1580.98	0.00967602	0	0	0.998328	1.46795	4.41042	0.152593	0.458463	0.869163	158.944	1.03625	0.94 / 1.083 / 1.182	0.905191	46.2749	no	nbinomial
model_20m_clx_IBP_num_sqrt_temp_sqrt_PC2_sqrt_PC9	1.792_x000D_ (1.306–2.262)	0.205_x000D_ (-0.01–0.416)	-	0.38_x000D_ (0.167–0.595)	0.171_x000D_ (0.012–0.33)	-	0.135_x000D_ (-0.026–0.297)	705.578_x000D_ (508.066–1055.147)	0.977_x000D_ (0.836–1.128)	1056.27	1044.52	-1427.43	0.0185422	0	0	0.997316	1.58014	5.36305	0.164256	0.557489	0.933208	150.27	1.00908	0.929 / 1.046 / 1.136	0.905755	42.979	no	nbinomial
model_20m_clx_IBP_num_sqrt_temp_sqrt_PC6_sqrt_PC9	1.795_x000D_ (1.327–2.255)	0.198_x000D_ (-0.011–0.404)	-	0.379_x000D_ (0.167–0.591)	-	-0.104_x000D_ (-0.268–0.059)	0.116_x000D_ (-0.044–0.277)	665.75_x000D_ (545.462–827.614)	0.998_x000D_ (0.887–1.167)	1074.43	1049.91	-1041.43	0.0307251	0	0	0.996611	1.7614	6.21403	0.183098	0.645949	1.12436	188.823	0.991701	0.916 / 1.028 / 1.113	0.902599	33.9839	no	nbinomial
model_20m_clx_IBP_num_sqrt_PC2_sqrt_PC6_sqrt_PC9	1.938_x000D_ (1.451–2.414)	0.275_x000D_ (0.065–0.484)	-	-	0.22_x000D_ (0.059–0.381)	-0.18_x000D_ (-0.348–-0.011)	0.145_x000D_ (-0.014–0.305)	883.847_x000D_ (685.834–1125.03)	1.016_x000D_ (0.897–1.151)	1059.78	1050.46	-1040.28	0.030838	0	0	0.996414	1.74673	6.08665	0.181573	0.632708	0.620062	211.595	1.06942	0.946 / 1.122 / 1.237	0.909362	42.7618	no	nbinomial
model_20m_clx_IBP_num_sqrt_precip_sqrt_temp_sqrt_PC2_sqrt_PC6	1.859_x000D_ (1.359–2.345)	0.241_x000D_ (0.02–0.459)	0.109_x000D_ (-0.28–0.493)	0.468_x000D_ (0.108–0.828)	0.2_x000D_ (0.039–0.362)	-0.165_x000D_ (-0.334–0.003)	-	801.851_x000D_ (587.225–1071.139)	0.996_x000D_ (0.849–1.147)	1059.07	1046.23	-1201.66	0.0277789	0	0	0.997126	1.7028	5.52914	0.177006	0.574755	0.833877	155.006	1.04075	0.935 / 1.087 / 1.193	0.905811	36.7169	no	nbinomial
model_20m_clx_IBP_num_sqrt_precip_sqrt_temp_sqrt_PC2_sqrt_PC9	1.839_x000D_ (1.345–2.32)	0.226_x000D_ (0.005–0.445)	0.159_x000D_ (-0.208–0.521)	0.497_x000D_ (0.155–0.838)	0.172_x000D_ (0.013–0.33)	-	0.142_x000D_ (-0.02–0.304)	530.289_x000D_ (367.515–672.556)	1.005_x000D_ (0.873–1.149)	1077.57	1048.6	-1426.83	0.013601	0	0	0.996643	1.6746	5.82169	0.174075	0.605165	0.870566	146.268	1.00637	0.925 / 1.043 / 1.132	0.90536	35.0433	no	nbinomial
model_20m_clx_IBP_num_sqrt_precip_sqrt_temp_sqrt_PC6_sqrt_PC9	1.793_x000D_ (1.3–2.276)	0.211_x000D_ (-0.01–0.43)	0.153_x000D_ (-0.22–0.524)	0.494_x000D_ (0.144–0.842)	-	-0.109_x000D_ (-0.275–0.056)	0.127_x000D_ (-0.035–0.29)	619.849_x000D_ (447.141–780.672)	1.002_x000D_ (0.879–1.142)	1049.06	1031.65	-2026.64	3.27875e-05	0	0	0.998768	1.31847	3.92372	0.137055	0.407871	0.997911	212.82	1.04768	0.959 / 1.091 / 1.186	0.909983	43.8129	no	nbinomial
model_20m_clx_IBP_num_sqrt_precip_sqrt_PC2_sqrt_PC6_sqrt_PC9	1.77_x000D_ (1.264–2.268)	0.189_x000D_ (-0.034–0.41)	-0.27_x000D_ (-0.533–-0.013)	-	0.217_x000D_ (0.056–0.378)	-0.175_x000D_ (-0.344–-0.007)	0.127_x000D_ (-0.033–0.287)	894.14_x000D_ (720.622–1108.335)	1.004_x000D_ (0.88–1.135)	1059.07	1049.79	-994.69	0.0319269	0	0	0.995843	1.76095	6.28202	0.183051	0.653017	0.696174	175.649	1.0746	0.946 / 1.124 / 1.245	0.909137	33.0285	no	nbinomial
model_20m_clx_IBP_num_sqrt_temp_sqrt_PC2_sqrt_PC6_sqrt_PC9	1.786_x000D_ (1.299–2.258)	0.196_x000D_ (-0.017–0.406)	-	0.37_x000D_ (0.151–0.594)	0.206_x000D_ (0.045–0.367)	-0.156_x000D_ (-0.324–0.012)	0.13_x000D_ (-0.03–0.29)	943.91_x000D_ (707.098–1480.614)	0.98_x000D_ (0.859–1.115)	1065.94	1044.5	-1070.2	0.0291987	0	0	0.997066	1.63997	5.5861	0.170475	0.580675	0.88115	171.651	1.02232	0.93 / 1.065 / 1.159	0.907615	34.9404	no	nbinomial
model_20m_clx_IBP_num_sqrt_precip_sqrt_temp_sqrt_PC2_sqrt_PC6_sqrt_PC9	1.809_x000D_ (1.309–2.295)	0.21_x000D_ (-0.012–0.43)	0.142_x000D_ (-0.244–0.52)	0.477_x000D_ (0.121–0.832)	0.207_x000D_ (0.046–0.368)	-0.157_x000D_ (-0.325–0.01)	0.136_x000D_ (-0.024–0.296)	762.178_x000D_ (545.688–986.063)	0.97_x000D_ (0.84–1.104)	1055.45	1046.5	-1091.75	0.0288764	0	0	0.996505	1.7097	5.90801	0.177723	0.614138	0.830951	181.236	1.03207	0.931 / 1.077 / 1.176	0.908066	32.3964	no	nbinomial

## Sheet: Table_S25_culex_30m
Model	Intercept	IBP_num	sqrt_precip	sqrt_temp	sqrt_PC1	sqrt_PC2	sqrt_PC6	sqrt_PC7	Range	Stdev	DIC	WAIC	LPML	CPO_median	cpo_failures	cpo_failure_rate	correlation	MAE	RMSE	MAE_rel	RMSE_rel	min_pred	max_pred	CV_mean	CV_q25_q50_q75	CV_high_prop	Time	non_zero_CrI	model_family
model_30m_clx_	1.388_x000D_ (1.133–1.64)	-	-	-	-	-	-	-	1080.62_x000D_ (932.973–1264.62)	1.09_x000D_ (0.975–1.223)	1072.28	1064.83	-808.412	0.0470345	0	0	0.990511	2.09666	8.13489	0.217948	0.845623	0.950759	181.703	1.10926	0.932 / 1.154 / 1.332	0.899329	39.7501	yes	nbinomial
model_30m_clx_IBP_num	2.033_x000D_ (1.564–2.494)	0.325_x000D_ (0.121–0.527)	-	-	-	-	-	-	800.544_x000D_ (657.179–959.875)	1.022_x000D_ (0.905–1.15)	1067.33	1058.09	-922.033	0.0370124	0	0	0.996081	1.83983	6.44136	0.191251	0.66958	0.991339	200.499	1.06317	0.958 / 1.117 / 1.217	0.908348	30.9555	yes	nbinomial
model_30m_clx_sqrt_precip	1.384_x000D_ (1.15–1.614)	-	-0.398_x000D_ (-0.646–-0.151)	-	-	-	-	-	957.162_x000D_ (835.82–1084.026)	1.043_x000D_ (0.939–1.157)	1067.25	1058.11	-820.211	0.0456482	0	0	0.992448	1.99391	7.55671	0.207268	0.785521	157880	3.70998e+07	1337.03	1299.901 / 1346.788 / 1365.521	1	32.2997	yes	nbinomial
model_30m_clx_sqrt_temp	1.388_x000D_ (1.166–1.608)	-	-	0.468_x000D_ (0.248–0.686)	-	-	-	-	800.507_x000D_ (644.929–964.057)	1.004_x000D_ (0.895–1.125)	1061.14	1053.42	-1057.95	0.0296459	0	0	0.994733	1.86691	6.80196	0.194065	0.707064	10.623	1162.81	1.3696	1.257 / 1.424 / 1.525	0.988783	37.8409	yes	nbinomial
model_30m_clx_sqrt_PC1	1.386_x000D_ (1.139–1.631)	-	-	-	0.196_x000D_ (0.04–0.354)	-	-	-	1067.833_x000D_ (937.512–1207.285)	1.066_x000D_ (0.977–1.178)	1068.69	1060.4	-779.989	0.0473645	0	0	0.989563	2.12374	8.32937	0.220763	0.865838	1.11316	282.017	1.10872	0.943 / 1.151 / 1.31	0.910377	29.0544	yes	nbinomial
model_30m_clx_sqrt_PC2	1.376_x000D_ (1.121–1.628)	-	-	-	-	0.188_x000D_ (0.029–0.347)	-	-	1092.671_x000D_ (897.845–1336.299)	1.086_x000D_ (0.957–1.25)	1069.05	1061.36	-853.871	0.0423649	0	0	0.990588	2.05149	7.83201	0.213252	0.814139	1.21497	446.076	1.25601	1.011 / 1.251 / 1.465	0.933713	32.0684	yes	nbinomial
model_30m_clx_sqrt_PC6	1.386_x000D_ (1.125–1.645)	-	-	-	-	-	-0.157_x000D_ (-0.329–0.013)	-	1122.712_x000D_ (997.587–1258.847)	1.103_x000D_ (1.005–1.206)	1070.16	1060.43	-794.956	0.0470774	0	0	0.992024	2.04906	7.79858	0.213	0.810663	0.318605	139.541	1.28202	1.008 / 1.261 / 1.5	0.926103	35.8402	no	nbinomial
model_30m_clx_sqrt_PC7	1.387_x000D_ (1.125–1.651)	-	-	-	-	-	-	-0.175_x000D_ (-0.341–-0.01)	1051.652_x000D_ (931.508–1182.916)	1.101_x000D_ (0.992–1.203)	1070.62	1063.23	-827.05	0.0433708	0	0	0.989009	2.02369	8.0643	0.210363	0.838285	0.393075	1.20905e+06	1.33968	1.083 / 1.304 / 1.463	0.960374	30.1816	yes	nbinomial
model_30m_clx_IBP_num_sqrt_precip	1.849_x000D_ (1.352–2.336)	0.221_x000D_ (0.001–0.44)	-0.291_x000D_ (-0.54–-0.047)	-	-	-	-	-	822.116_x000D_ (623.382–1109.612)	0.991_x000D_ (0.865–1.143)	1076.31	1066.38	-815.133	0.0472709	0	0	0.993436	2.08971	7.66337	0.217226	0.796608	3.06621e+10	1.24977e+13	1276.34	1243.826 / 1284.973 / 1303.132	1	34.0733	yes	nbinomial
model_30m_clx_IBP_num_sqrt_temp	1.877_x000D_ (1.415–2.328)	0.244_x000D_ (0.04–0.447)	-	0.389_x000D_ (0.182–0.598)	-	-	-	-	520.15_x000D_ (387.234–657.664)	0.992_x000D_ (0.874–1.131)	1068.18	1043.14	-1597.01	0.00624812	0	0	0.998247	1.5301	4.83529	0.159054	0.502629	8.11792	954.636	1.29665	1.216 / 1.33 / 1.42	0.985852	37.3843	yes	nbinomial
model_30m_clx_IBP_num_sqrt_PC1	2.03_x000D_ (1.565–2.485)	0.327_x000D_ (0.124–0.528)	-	-	0.208_x000D_ (0.042–0.375)	-	-	-	723.663_x000D_ (585.126–881.19)	1.017_x000D_ (0.895–1.139)	1056.38	1045.93	-1223.99	0.0264752	0	0	0.997349	1.62362	5.47708	0.168775	0.569343	1.29868	322.613	1.1056	1.008 / 1.145 / 1.247	0.92802	32.6599	yes	nbinomial
model_30m_clx_IBP_num_sqrt_PC2	2.016_x000D_ (1.548–2.474)	0.315_x000D_ (0.114–0.516)	-	-	-	0.185_x000D_ (0.024–0.346)	-	-	825.937_x000D_ (674.101–985.084)	1.011_x000D_ (0.895–1.144)	1066.48	1057.8	-894.667	0.0383582	0	0	0.995442	1.87819	6.47755	0.195238	0.673342	1.41285	463.804	1.20162	1.017 / 1.187 / 1.36	0.940308	34.295	yes	nbinomial
model_30m_clx_IBP_num_sqrt_PC6	2.034_x000D_ (1.566–2.493)	0.316_x000D_ (0.112–0.518)	-	-	-	-	-0.148_x000D_ (-0.319–0.022)	-	874.329_x000D_ (734.421–1048.761)	1.016_x000D_ (0.908–1.158)	1071.54	1062.6	-792.008	0.0478328	0	0	0.995115	2.01347	7.08919	0.2093	0.736922	0.378088	143.763	1.20809	1.004 / 1.186 / 1.375	0.929598	32.9169	no	nbinomial
model_30m_clx_IBP_num_sqrt_PC7	2.058_x000D_ (1.549–2.554)	0.314_x000D_ (0.092–0.53)	-	-	-	-	-	-0.181_x000D_ (-0.349–-0.013)	337.118_x000D_ (9.861–1059.529)	1.172_x000D_ (0.939–1.629)	1114.17	1089.83	-971.421	0.0397897	0	0	0.985973	2.55549	9.19638	0.265643	0.955965	0.434347	97.6952	1.16048	1.04 / 1.176 / 1.294	0.969337	29.2318	yes	nbinomial
model_30m_clx_IBP_num_sqrt_precip_sqrt_temp	1.913_x000D_ (1.423–2.388)	0.264_x000D_ (0.047–0.478)	0.126_x000D_ (-0.234–0.482)	0.486_x000D_ (0.148–0.823)	-	-	-	-	598.48_x000D_ (409.63–853.565)	0.973_x000D_ (0.847–1.115)	1057.35	1046.43	-1329.45	0.022918	0	0	0.997921	1.60422	5.17924	0.166758	0.538382	5.72653e+47	1.32405e+54	1765.14	1718.607 / 1777.907 / 1802.311	1	35.6724	no	nbinomial
model_30m_clx_IBP_num_sqrt_precip_sqrt_PC1	1.835_x000D_ (1.345–2.318)	0.221_x000D_ (0.002–0.439)	-0.28_x000D_ (-0.519–-0.043)	-	0.202_x000D_ (0.038–0.368)	-	-	-	632.402_x000D_ (493.431–781.981)	0.991_x000D_ (0.857–1.118)	1075.01	1050.28	-1114.19	0.027425	0	0	0.996072	1.76248	6.23755	0.18321	0.648394	1.1569e+10	4.95419e+12	1268.22	1235.453 / 1276.245 / 1294.971	1	33.8212	yes	nbinomial
model_30m_clx_IBP_num_sqrt_precip_sqrt_PC2	1.809_x000D_ (1.318–2.292)	0.211_x000D_ (-0.007–0.427)	-0.312_x000D_ (-0.561–-0.068)	-	-	0.198_x000D_ (0.038–0.358)	-	-	818.545_x000D_ (663.45–1016.423)	0.992_x000D_ (0.869–1.126)	1063.22	1054.31	-943.504	0.0350689	0	0	0.995251	1.84405	6.4492	0.191689	0.670395	3.14188e+09	2.54269e+12	1343.96	1309.681 / 1353.489 / 1371.122	1	36.6294	no	nbinomial
model_30m_clx_IBP_num_sqrt_precip_sqrt_PC6	1.836_x000D_ (1.338–2.328)	0.22_x000D_ (0–0.439)	-0.276_x000D_ (-0.535–-0.02)	-	-	-	-0.128_x000D_ (-0.3–0.043)	-	874.119_x000D_ (697.198–1080.032)	1.019_x000D_ (0.896–1.157)	1065.99	1056.26	-933.83	0.0367665	0	0	0.995413	1.89643	6.69277	0.197134	0.695714	1.23441e+12	2262438582949681	1344.38	1310.722 / 1352.704 / 1371.849	1	33.6042	no	nbinomial
model_30m_clx_IBP_num_sqrt_precip_sqrt_PC7	1.824_x000D_ (1.337–2.304)	0.216_x000D_ (-0.001–0.431)	-0.281_x000D_ (-0.525–-0.04)	-	-	-	-	-0.172_x000D_ (-0.335–-0.01)	791.538_x000D_ (638.936–975.801)	0.995_x000D_ (0.871–1.139)	1064.27	1055.29	-936.92	0.0376059	0	0	0.993908	1.8817	6.97373	0.195603	0.72492	1.01704e+10	8.86677e+12	1237.49	1205.588 / 1245.273 / 1262.774	1	30.9971	no	nbinomial
model_30m_clx_IBP_num_sqrt_temp_sqrt_PC1	1.861_x000D_ (1.401–2.31)	0.237_x000D_ (0.033–0.438)	-	0.38_x000D_ (0.176–0.585)	0.203_x000D_ (0.041–0.367)	-	-	-	497.539_x000D_ (350.689–639.214)	0.979_x000D_ (0.854–1.117)	1055.05	1034.37	-1698.37	0.00240383	0	0	0.99853	1.41789	4.3246	0.14739	0.449542	9.80235	1435.89	1.31418	1.228 / 1.336 / 1.438	0.989234	35.4689	yes	nbinomial
model_30m_clx_IBP_num_sqrt_temp_sqrt_PC2	1.852_x000D_ (1.376–2.311)	0.233_x000D_ (0.024–0.438)	-	0.398_x000D_ (0.188–0.611)	-	0.189_x000D_ (0.03–0.348)	-	-	678.472_x000D_ (468.073–893.945)	0.959_x000D_ (0.827–1.111)	1052.9	1048.97	-1336.38	0.0200209	0	0	0.996811	1.72969	5.71954	0.179801	0.594547	12.2092	2649.97	1.4912	1.306 / 1.455 / 1.642	0.995603	31.2241	yes	nbinomial
model_30m_clx_IBP_num_sqrt_temp_sqrt_PC6	1.875_x000D_ (1.407–2.334)	0.243_x000D_ (0.034–0.449)	-	0.375_x000D_ (0.159–0.59)	-	-	-0.09_x000D_ (-0.262–0.083)	-	600.973_x000D_ (441.035–832.539)	0.99_x000D_ (0.862–1.14)	1067.69	1044.35	-1535.81	0.00979223	0	0	0.998081	1.56651	4.97783	0.162838	0.517446	5.70836	745.247	1.56238	1.342 / 1.503 / 1.733	0.993574	31.1325	no	nbinomial
model_30m_clx_IBP_num_sqrt_temp_sqrt_PC7	1.851_x000D_ (1.393–2.299)	0.245_x000D_ (0.042–0.446)	-	0.374_x000D_ (0.169–0.58)	-	-	-	-0.163_x000D_ (-0.326–0)	577.233_x000D_ (432.996–765.66)	0.987_x000D_ (0.868–1.12)	1031.47	1026.13	-2311.66	1.65885e-05	0	0	0.99919	1.17866	3.15492	0.122522	0.327955	3.59715	515.499	1.45792	1.324 / 1.461 / 1.604	0.997351	43.0941	no	nbinomial
model_30m_clx_IBP_num_sqrt_PC1_sqrt_PC2	1.999_x000D_ (1.531–2.456)	0.306_x000D_ (0.105–0.506)	-	-	0.235_x000D_ (0.072–0.399)	0.221_x000D_ (0.059–0.385)	-	-	794.471_x000D_ (625.259–994.313)	0.995_x000D_ (0.871–1.135)	1059.49	1051.23	-1038.57	0.0291079	0	0	0.995158	1.83741	6.41372	0.190999	0.666707	1.76828	1240.78	1.2482	1.059 / 1.226 / 1.418	0.95733	37.7825	yes	nbinomial
model_30m_clx_IBP_num_sqrt_PC1_sqrt_PC6	2.027_x000D_ (1.53–2.506)	0.318_x000D_ (0.1–0.531)	-	-	0.179_x000D_ (0.008–0.353)	-	-0.097_x000D_ (-0.277–0.082)	-	803.285_x000D_ (479.298–1261.112)	1.016_x000D_ (0.866–1.187)	1065.47	1054.58	-1143.22	0.0269732	0	0	0.996216	1.82333	6.34813	0.189535	0.659889	0.806462	237.367	1.30968	1.091 / 1.272 / 1.496	0.955245	35.8021	no	nbinomial
model_30m_clx_IBP_num_sqrt_PC1_sqrt_PC7	2.049_x000D_ (1.582–2.499)	0.34_x000D_ (0.131–0.544)	-	-	0.187_x000D_ (0.017–0.359)	-	-	-0.153_x000D_ (-0.324–0.016)	660.266_x000D_ (501.945–920.452)	1.017_x000D_ (0.889–1.155)	1036.68	1034.41	-2465.1	4.43829e-06	0	0	0.998694	1.30918	3.94544	0.136089	0.410129	0.673319	156.023	1.26029	1.112 / 1.257 / 1.419	0.977622	38.4959	no	nbinomial
model_30m_clx_IBP_num_sqrt_PC2_sqrt_PC6	1.99_x000D_ (1.522–2.451)	0.305_x000D_ (0.101–0.507)	-	-	-	0.22_x000D_ (0.058–0.381)	-0.198_x000D_ (-0.37–-0.026)	-	907.503_x000D_ (748.455–1092.718)	1.028_x000D_ (0.912–1.175)	1055.94	1047.7	-1135.67	0.0271182	0	0	0.996928	1.72909	5.56159	0.179739	0.578127	0.39415	636.401	1.34977	1.075 / 1.311 / 1.642	0.950905	42.9097	yes	nbinomial
model_30m_clx_IBP_num_sqrt_PC2_sqrt_PC7	2.018_x000D_ (1.539–2.482)	0.321_x000D_ (0.113–0.527)	-	-	-	0.135_x000D_ (-0.043–0.313)	-	-0.125_x000D_ (-0.306–0.055)	784.65_x000D_ (580.981–1036.105)	1.009_x000D_ (0.876–1.144)	1062.99	1054.26	-1121.61	0.0286284	0	0	0.995549	1.77764	6.23548	0.184786	0.648178	0.74537	298.002	1.4917	1.24 / 1.463 / 1.719	0.992898	37.7614	no	nbinomial
model_30m_clx_IBP_num_sqrt_PC6_sqrt_PC7	2.01_x000D_ (1.519–2.483)	0.317_x000D_ (0.103–0.527)	-	-	-	-	-0.162_x000D_ (-0.336–0.012)	-0.188_x000D_ (-0.355–-0.023)	818.726_x000D_ (541.086–1167.779)	1.045_x000D_ (0.893–1.201)	1052.33	1041.44	-1779.56	0.0017359	0	0	0.997768	1.49558	4.84169	0.155466	0.503294	0.181901	104.892	1.40144	1.185 / 1.378 / 1.603	0.977115	39.0124	no	nbinomial
model_30m_clx_IBP_num_sqrt_precip_sqrt_temp_sqrt_PC1	1.88_x000D_ (1.397–2.351)	0.261_x000D_ (0.046–0.474)	0.125_x000D_ (-0.227–0.475)	0.477_x000D_ (0.144–0.81)	0.206_x000D_ (0.042–0.372)	-	-	-	502.211_x000D_ (317.294–682.165)	0.995_x000D_ (0.859–1.126)	1036.37	1021.25	-2562.98	3.10456e-06	0	0	0.999427	1.09669	2.64691	0.114001	0.275147	5.51787e+46	1.36537e+53	1798.39	1750.627 / 1810.719 / 1836.209	1	61.805	no	nbinomial
model_30m_clx_IBP_num_sqrt_precip_sqrt_temp_sqrt_PC2	1.868_x000D_ (1.388–2.339)	0.242_x000D_ (0.029–0.454)	0.091_x000D_ (-0.277–0.456)	0.466_x000D_ (0.122–0.81)	-	0.187_x000D_ (0.027–0.348)	-	-	689.637_x000D_ (544.538–864.975)	0.986_x000D_ (0.863–1.12)	1074.74	1050.58	-1015.44	0.032906	0	0	0.996449	1.76997	5.93104	0.183989	0.616533	1.02968e+47	2.6105e+53	1967.81	1915.739 / 1981.522 / 2009.019	1	37.8399	no	nbinomial
model_30m_clx_IBP_num_sqrt_precip_sqrt_temp_sqrt_PC6	1.899_x000D_ (1.413–2.376)	0.253_x000D_ (0.037–0.468)	0.121_x000D_ (-0.252–0.491)	0.464_x000D_ (0.114–0.813)	-	-	-0.096_x000D_ (-0.268–0.076)	-	699.406_x000D_ (542.704–911.134)	0.975_x000D_ (0.857–1.118)	1057.81	1051.06	-1128.94	0.0282972	0	0	0.997014	1.75726	5.8879	0.182668	0.612048	5.77925e+48	2.97062e+55	1870.19	1823.395 / 1882.1 / 1908.702	1	42.9746	no	nbinomial
model_30m_clx_IBP_num_sqrt_precip_sqrt_temp_sqrt_PC7	1.893_x000D_ (1.414–2.361)	0.255_x000D_ (0.039–0.468)	0.112_x000D_ (-0.246–0.467)	0.456_x000D_ (0.118–0.793)	-	-	-	-0.159_x000D_ (-0.323–0.004)	598.124_x000D_ (420.38–826.057)	0.995_x000D_ (0.864–1.147)	1065.16	1041.61	-1702.32	0.00380091	0	0	0.997799	1.52674	4.94821	0.158705	0.514367	1.61269e+46	3.67847e+52	1825.32	1777.212 / 1838.249 / 1863.974	1	38.053	no	nbinomial
model_30m_clx_IBP_num_sqrt_precip_sqrt_PC1_sqrt_PC2	1.771_x000D_ (1.276–2.258)	0.189_x000D_ (-0.029–0.406)	-0.312_x000D_ (-0.563–-0.065)	-	0.231_x000D_ (0.069–0.395)	0.235_x000D_ (0.073–0.398)	-	-	826.037_x000D_ (667.989–1001.688)	0.973_x000D_ (0.833–1.088)	1065.94	1053.55	-790.657	0.0500058	0	0	0.992837	1.9587	7.16997	0.203607	0.745319	8.44557e+09	8.43756e+12	1508.99	1469.901 / 1519.605 / 1539.684	1	37.6816	no	nbinomial
model_30m_clx_IBP_num_sqrt_precip_sqrt_PC1_sqrt_PC6	1.831_x000D_ (1.344–2.312)	0.219_x000D_ (0.003–0.435)	-0.274_x000D_ (-0.518–-0.031)	-	0.181_x000D_ (0.015–0.349)	-	-0.072_x000D_ (-0.249–0.104)	-	785.395_x000D_ (661.342–916.925)	0.999_x000D_ (0.896–1.127)	1062.21	1051.61	-891.572	0.0382725	0	0	0.995414	1.85627	6.613	0.192959	0.687422	4.34498e+10	3.99998e+13	1355.74	1320.559 / 1364.508 / 1383.334	1	42.6995	no	nbinomial
model_30m_clx_IBP_num_sqrt_precip_sqrt_PC1_sqrt_PC7	1.847_x000D_ (1.352–2.329)	0.227_x000D_ (0.008–0.444)	-0.267_x000D_ (-0.501–-0.038)	-	0.179_x000D_ (0.013–0.348)	-	-	-0.143_x000D_ (-0.31–0.024)	640.037_x000D_ (442.57–915.956)	1.01_x000D_ (0.875–1.163)	1067.31	1044	-1584.66	0.00795353	0	0	0.996886	1.60505	5.51299	0.166845	0.573076	1.91189e+09	1.35589e+12	1249.5	1217.322 / 1257.813 / 1277.311	1	32.1853	no	nbinomial
model_30m_clx_IBP_num_sqrt_precip_sqrt_PC2_sqrt_PC6	1.786_x000D_ (1.275–2.287)	0.205_x000D_ (-0.017–0.428)	-0.302_x000D_ (-0.573–-0.038)	-	-	0.231_x000D_ (0.068–0.395)	-0.179_x000D_ (-0.356–-0.004)	-	898.217_x000D_ (687.246–1136.21)	1.014_x000D_ (0.855–1.149)	1057.15	1045.83	-1266.93	0.0253997	0	0	0.996559	1.69947	5.62334	0.17666	0.584547	1.05687e+12	7372367491915863	1574.98	1539.259 / 1584.555 / 1606.975	1	43.1758	no	nbinomial
model_30m_clx_IBP_num_sqrt_precip_sqrt_PC2_sqrt_PC7	1.803_x000D_ (1.312–2.285)	0.208_x000D_ (-0.01–0.425)	-0.302_x000D_ (-0.552–-0.058)	-	-	0.154_x000D_ (-0.021–0.329)	-	-0.108_x000D_ (-0.285–0.069)	809.543_x000D_ (620.977–1013.509)	0.996_x000D_ (0.872–1.138)	1061.89	1053.45	-1030.08	0.0306658	0	0	0.994477	1.83469	6.60072	0.190717	0.686146	4.00482e+09	4.65323e+12	1375.7	1340.63 / 1384.738 / 1404.165	1	37.8885	no	nbinomial
model_30m_clx_IBP_num_sqrt_precip_sqrt_PC6_sqrt_PC7	1.832_x000D_ (1.338–2.319)	0.22_x000D_ (0.002–0.438)	-0.263_x000D_ (-0.517–-0.012)	-	-	-	-0.139_x000D_ (-0.311–0.032)	-0.181_x000D_ (-0.344–-0.018)	838.121_x000D_ (693.038–1030.697)	1.002_x000D_ (0.888–1.121)	1064.91	1053.49	-882.036	0.0423134	0	0	0.994063	1.88712	6.93626	0.196166	0.721025	5.11092e+11	1077205643480256	1384.77	1349.863 / 1393.599 / 1412.62	1	37.1981	no	nbinomial
model_30m_clx_IBP_num_sqrt_temp_sqrt_PC1_sqrt_PC2	1.832_x000D_ (1.378–2.278)	0.222_x000D_ (0.022–0.42)	-	0.384_x000D_ (0.178–0.591)	0.23_x000D_ (0.07–0.392)	0.221_x000D_ (0.06–0.381)	-	-	597.634_x000D_ (469.623–744.937)	0.964_x000D_ (0.85–1.096)	1060	1037.14	-1286.49	0.0221259	0	0	0.997296	1.59065	5.12635	0.165348	0.532885	17.0088	4654.7	1.4764	1.293 / 1.443 / 1.637	0.996336	37.139	yes	nbinomial
model_30m_clx_IBP_num_sqrt_temp_sqrt_PC1_sqrt_PC6	1.857_x000D_ (1.377–2.317)	0.245_x000D_ (0.033–0.454)	-	0.377_x000D_ (0.167–0.587)	0.201_x000D_ (0.029–0.376)	-	-0.027_x000D_ (-0.211–0.158)	-	510.429_x000D_ (232.559–949.6)	1.01_x000D_ (0.866–1.157)	1030.79	1022.32	-3368.72	4.49004e-09	18.948	0.0947398	0.999555	1.0228	2.22694	0.10632	0.231491	9.54189	1526.84	1.65723	1.397 / 1.581 / 1.859	0.99566	54.1912	no	nbinomial
model_30m_clx_IBP_num_sqrt_temp_sqrt_PC1_sqrt_PC7	1.83_x000D_ (1.369–2.282)	0.225_x000D_ (0.022–0.427)	-	0.37_x000D_ (0.163–0.578)	0.179_x000D_ (0.015–0.344)	-	-	-0.13_x000D_ (-0.295–0.035)	581.643_x000D_ (397.403–721.249)	0.97_x000D_ (0.854–1.096)	1046.74	1037.15	-1395.08	0.0163388	0	0	0.997347	1.55308	5.19339	0.161443	0.539853	5.46359	699.302	1.5078	1.346 / 1.497 / 1.671	0.998365	38.5709	no	nbinomial
model_30m_clx_IBP_num_sqrt_temp_sqrt_PC2_sqrt_PC6	1.804_x000D_ (1.329–2.271)	0.211_x000D_ (0.004–0.417)	-	0.381_x000D_ (0.152–0.612)	-	0.221_x000D_ (0.061–0.381)	-0.155_x000D_ (-0.327–0.017)	-	836.124_x000D_ (667.145–992.645)	0.983_x000D_ (0.861–1.11)	1057.96	1048.25	-922.993	0.0360518	0	0	0.995754	1.83595	6.17257	0.190848	0.641639	4.67575	3534.88	1.7562	1.457 / 1.697 / 2.074	0.997802	44.0152	no	nbinomial
model_30m_clx_IBP_num_sqrt_temp_sqrt_PC2_sqrt_PC7	1.834_x000D_ (1.366–2.287)	0.243_x000D_ (0.037–0.446)	-	0.383_x000D_ (0.176–0.593)	-	0.144_x000D_ (-0.032–0.321)	-	-0.102_x000D_ (-0.281–0.076)	591.684_x000D_ (424.131–824.457)	0.997_x000D_ (0.873–1.131)	1016.73	1016.15	-3107.62	1.05039e-08	0.382436	0.00191218	0.999623	0.903068	1.62444	0.093874	0.168861	7.33362	1550.26	1.87259	1.577 / 1.846 / 2.141	0.999605	42.6772	no	nbinomial
model_30m_clx_IBP_num_sqrt_temp_sqrt_PC6_sqrt_PC7	1.862_x000D_ (1.391–2.319)	0.237_x000D_ (0.031–0.441)	-	0.355_x000D_ (0.14–0.571)	-	-	-0.105_x000D_ (-0.277–0.067)	-0.168_x000D_ (-0.332–-0.006)	624.624_x000D_ (457.478–873.471)	0.975_x000D_ (0.852–1.125)	1066.62	1045.03	-1280.67	0.0249492	0	0	0.996888	1.66645	5.66642	0.173228	0.589025	2.2537	425.798	1.72822	1.481 / 1.685 / 1.941	0.999211	34.5219	no	nbinomial
model_30m_clx_IBP_num_sqrt_PC1_sqrt_PC2_sqrt_PC6	2.004_x000D_ (1.527–2.465)	0.306_x000D_ (0.099–0.51)	-	-	0.201_x000D_ (0.036–0.369)	0.242_x000D_ (0.08–0.405)	-0.14_x000D_ (-0.317–0.036)	-	853.992_x000D_ (639.332–1169.364)	0.996_x000D_ (0.876–1.159)	1063.21	1053.71	-930.426	0.0385959	0	0	0.994633	1.95755	6.76732	0.203487	0.703464	0.865414	1128.76	1.38625	1.122 / 1.359 / 1.68	0.970182	33.9039	no	nbinomial
model_30m_clx_IBP_num_sqrt_PC1_sqrt_PC2_sqrt_PC7	1.996_x000D_ (1.534–2.448)	0.312_x000D_ (0.112–0.512)	-	-	0.224_x000D_ (0.053–0.395)	0.196_x000D_ (0.013–0.379)	-	-0.059_x000D_ (-0.245–0.126)	755.969_x000D_ (607.925–920.629)	1.002_x000D_ (0.887–1.128)	1052.05	1043.7	-1269.97	0.023815	0	0	0.996478	1.64733	5.59252	0.17124	0.581343	1.44889	1039.85	1.61952	1.318 / 1.596 / 1.891	0.996618	43.2583	no	nbinomial
model_30m_clx_IBP_num_sqrt_PC1_sqrt_PC6_sqrt_PC7	2.017_x000D_ (1.548–2.476)	0.316_x000D_ (0.111–0.519)	-	-	0.146_x000D_ (-0.027–0.321)	-	-0.116_x000D_ (-0.296–0.063)	-0.161_x000D_ (-0.33–0.007)	759.897_x000D_ (576.052–957.943)	1.01_x000D_ (0.881–1.15)	1060.99	1050.27	-1066.2	0.0299767	0	0	0.995505	1.78124	6.35353	0.18516	0.66045	0.357299	111.862	1.49028	1.234 / 1.454 / 1.722	0.989459	37.5853	no	nbinomial
model_30m_clx_IBP_num_sqrt_PC2_sqrt_PC6_sqrt_PC7	1.994_x000D_ (1.517–2.461)	0.308_x000D_ (0.102–0.512)	-	-	-	0.174_x000D_ (-0.005–0.352)	-0.194_x000D_ (-0.369–-0.021)	-0.117_x000D_ (-0.296–0.061)	886.293_x000D_ (709.416–1118.015)	1.016_x000D_ (0.89–1.143)	1060.48	1052.03	-1016.41	0.0318046	0	0	0.99547	1.82851	6.28749	0.190074	0.653585	0.289143	440.062	1.62786	1.352 / 1.631 / 1.927	0.994983	35.6912	no	nbinomial
model_30m_clx_IBP_num_sqrt_precip_sqrt_temp_sqrt_PC1_sqrt_PC2	1.85_x000D_ (1.379–2.312)	0.248_x000D_ (0.035–0.458)	0.093_x000D_ (-0.258–0.439)	0.454_x000D_ (0.123–0.783)	0.234_x000D_ (0.072–0.398)	0.216_x000D_ (0.055–0.378)	-	-	574.666_x000D_ (417.71–779.301)	0.984_x000D_ (0.866–1.119)	1015.52	1012.34	-2964.99	1.67845e-08	0	0	0.999553	0.962286	1.83385	0.10003	0.190629	7.21194e+44	1.26357e+51	1874.36	1825.089 / 1887.426 / 1913.204	1	43.9669	no	nbinomial
model_30m_clx_IBP_num_sqrt_precip_sqrt_temp_sqrt_PC1_sqrt_PC6	1.886_x000D_ (1.403–2.358)	0.253_x000D_ (0.038–0.466)	0.121_x000D_ (-0.238–0.478)	0.467_x000D_ (0.127–0.806)	0.193_x000D_ (0.024–0.364)	-	-0.036_x000D_ (-0.215–0.143)	-	620.871_x000D_ (454.353–799.789)	0.976_x000D_ (0.848–1.108)	1052.79	1039.82	-1374.78	0.0196841	0	0	0.997917	1.54358	4.97281	0.160455	0.516924	2.09231e+47	6.76192e+53	1832.38	1786.698 / 1843.415 / 1869.926	1	40.524	no	nbinomial
model_30m_clx_IBP_num_sqrt_precip_sqrt_temp_sqrt_PC1_sqrt_PC7	1.895_x000D_ (1.429–2.351)	0.252_x000D_ (0.044–0.459)	0.113_x000D_ (-0.232–0.457)	0.453_x000D_ (0.125–0.781)	0.18_x000D_ (0.017–0.345)	-	-	-0.128_x000D_ (-0.293–0.036)	569.341_x000D_ (443.736–725.68)	0.978_x000D_ (0.865–1.133)	1063.7	1043.03	-1121.3	0.0272424	0	0	0.996817	1.6757	5.73272	0.174189	0.595916	6.32997e+44	1.01179e+51	1759.81	1712.787 / 1771.254 / 1797.419	1	33.0117	no	nbinomial
model_30m_clx_IBP_num_sqrt_precip_sqrt_temp_sqrt_PC2_sqrt_PC6	1.855_x000D_ (1.363–2.338)	0.232_x000D_ (0.015–0.449)	0.077_x000D_ (-0.314–0.463)	0.436_x000D_ (0.074–0.798)	-	0.217_x000D_ (0.055–0.38)	-0.149_x000D_ (-0.323–0.025)	-	907.155_x000D_ (730.266–1182.838)	0.983_x000D_ (0.853–1.103)	1081.64	1056.28	-815.459	0.0465822	0	0	0.994902	1.9715	6.74575	0.204938	0.701221	3.16058e+48	3.93898e+55	2158.57	2105 / 2173.011 / 2202.594	1	39.5308	no	nbinomial
model_30m_clx_IBP_num_sqrt_precip_sqrt_temp_sqrt_PC2_sqrt_PC7	1.873_x000D_ (1.398–2.34)	0.248_x000D_ (0.034–0.46)	0.094_x000D_ (-0.266–0.451)	0.454_x000D_ (0.114–0.791)	-	0.145_x000D_ (-0.031–0.321)	-	-0.098_x000D_ (-0.276–0.079)	604.623_x000D_ (447.107–789.307)	0.991_x000D_ (0.872–1.145)	1058.54	1039.51	-1521.51	0.011816	0	0	0.997863	1.50457	4.74794	0.1564	0.493549	5.37013e+45	1.13781e+52	1904.87	1854.478 / 1918.486 / 1944.752	1	36.9276	no	nbinomial
model_30m_clx_IBP_num_sqrt_precip_sqrt_temp_sqrt_PC6_sqrt_PC7	1.87_x000D_ (1.385–2.346)	0.243_x000D_ (0.028–0.457)	0.105_x000D_ (-0.271–0.478)	0.434_x000D_ (0.081–0.787)	-	-	-0.113_x000D_ (-0.285–0.059)	-0.167_x000D_ (-0.331–-0.004)	712.69_x000D_ (550.7–885.353)	0.975_x000D_ (0.854–1.105)	1057.82	1048.66	-1038.28	0.0317945	0	0	0.995764	1.77692	6.24943	0.184711	0.649629	9.32466e+47	5.57003e+54	1948.83	1898.964 / 1961.764 / 1989.04	1	32.4565	no	nbinomial
model_30m_clx_IBP_num_sqrt_precip_sqrt_PC1_sqrt_PC2_sqrt_PC6	1.781_x000D_ (1.296–2.26)	0.192_x000D_ (-0.021–0.405)	-0.3_x000D_ (-0.553–-0.05)	-	0.2_x000D_ (0.038–0.364)	0.251_x000D_ (0.091–0.412)	-0.121_x000D_ (-0.296–0.054)	-	876.12_x000D_ (729.124–1037.079)	0.986_x000D_ (0.879–1.122)	1058.88	1048.63	-858.29	0.0404078	0	0	0.994049	1.91547	6.76664	0.199114	0.703393	2.08082e+10	7.63348e+13	1412.9	1378.038 / 1422.326 / 1441.102	1	36.7998	no	nbinomial
model_30m_clx_IBP_num_sqrt_precip_sqrt_PC1_sqrt_PC2_sqrt_PC7	1.78_x000D_ (1.27–2.275)	0.2_x000D_ (-0.024–0.423)	-0.302_x000D_ (-0.554–-0.061)	-	0.224_x000D_ (0.055–0.394)	0.214_x000D_ (0.031–0.397)	-	-0.042_x000D_ (-0.228–0.142)	754.313_x000D_ (451.905–1120.278)	1.005_x000D_ (0.853–1.165)	1066.09	1041.74	-1546.93	0.00889031	0	0	0.996437	1.6225	5.48877	0.16866	0.570559	6.57786e+09	7.72423e+12	1469.66	1434.881 / 1478.402 / 1504.167	1	34.1773	no	nbinomial
model_30m_clx_IBP_num_sqrt_precip_sqrt_PC1_sqrt_PC6_sqrt_PC7	1.849_x000D_ (1.365–2.326)	0.228_x000D_ (0.013–0.442)	-0.258_x000D_ (-0.495–-0.023)	-	0.154_x000D_ (-0.017–0.327)	-	-0.086_x000D_ (-0.264–0.092)	-0.153_x000D_ (-0.32–0.014)	725.467_x000D_ (618.9–858.657)	0.983_x000D_ (0.88–1.105)	1061.74	1050.3	-879.694	0.0399101	0	0	0.994867	1.82848	6.66219	0.190071	0.692535	1.44434e+10	1.46117e+13	1351.21	1315.601 / 1360.023 / 1378.895	1	38.6534	no	nbinomial
model_30m_clx_IBP_num_sqrt_precip_sqrt_PC2_sqrt_PC6_sqrt_PC7	1.791_x000D_ (1.293–2.281)	0.206_x000D_ (-0.012–0.424)	-0.291_x000D_ (-0.555–-0.033)	-	-	0.189_x000D_ (0.013–0.365)	-0.177_x000D_ (-0.35–-0.004)	-0.103_x000D_ (-0.279–0.072)	891.399_x000D_ (687.991–1104.774)	1.011_x000D_ (0.886–1.162)	1051.84	1046.69	-1323.38	0.0229827	0	0	0.995555	1.75911	6.07053	0.18286	0.631032	3.12081e+11	1773671686597399	1470.63	1436.942 / 1479.004 / 1499.723	1	35.4578	no	nbinomial
model_30m_clx_IBP_num_sqrt_temp_sqrt_PC1_sqrt_PC2_sqrt_PC6	1.807_x000D_ (1.344–2.261)	0.211_x000D_ (0.008–0.412)	-	0.377_x000D_ (0.16–0.595)	0.207_x000D_ (0.044–0.371)	0.239_x000D_ (0.079–0.4)	-0.091_x000D_ (-0.267–0.085)	-	749.954_x000D_ (595.105–916.338)	0.957_x000D_ (0.848–1.094)	1053.19	1042.63	-968.709	0.0345282	0	0	0.995728	1.7834	6.05208	0.185384	0.629115	11.0773	5100.23	1.75229	1.46 / 1.712 / 2.071	0.998591	32.6776	no	nbinomial
model_30m_clx_IBP_num_sqrt_temp_sqrt_PC1_sqrt_PC2_sqrt_PC7	1.827_x000D_ (1.365–2.277)	0.223_x000D_ (0.02–0.424)	-	0.383_x000D_ (0.176–0.593)	0.225_x000D_ (0.057–0.394)	0.207_x000D_ (0.026–0.388)	-	-0.034_x000D_ (-0.218–0.149)	630.6_x000D_ (474.186–838.328)	0.954_x000D_ (0.825–1.085)	1063.53	1039.47	-1225.08	0.0232664	0	0	0.996921	1.62238	5.35916	0.168646	0.557085	16.326	5056.48	1.96347	1.631 / 1.948 / 2.267	0.999944	34.1666	no	nbinomial
model_30m_clx_IBP_num_sqrt_temp_sqrt_PC1_sqrt_PC6_sqrt_PC7	1.842_x000D_ (1.371–2.299)	0.233_x000D_ (0.026–0.438)	-	0.361_x000D_ (0.149–0.573)	0.166_x000D_ (-0.006–0.34)	-	-0.053_x000D_ (-0.235–0.129)	-0.137_x000D_ (-0.304–0.03)	588.115_x000D_ (389.427–818.969)	0.973_x000D_ (0.841–1.112)	1042.56	1034.66	-1723.26	0.00140789	0	0	0.997984	1.4562	4.67364	0.151372	0.485826	4.89261	616.846	1.88083	1.572 / 1.829 / 2.15	0.999324	41.8021	no	nbinomial
model_30m_clx_IBP_num_sqrt_temp_sqrt_PC2_sqrt_PC6_sqrt_PC7	1.815_x000D_ (1.342–2.28)	0.214_x000D_ (0.007–0.419)	-	0.367_x000D_ (0.14–0.596)	-	0.181_x000D_ (0.005–0.357)	-0.15_x000D_ (-0.323–0.022)	-0.093_x000D_ (-0.269–0.082)	800.486_x000D_ (640.743–960.273)	0.976_x000D_ (0.86–1.107)	1060.07	1049.13	-882.684	0.0381424	0	0	0.995106	1.84316	6.40086	0.191597	0.665371	3.65352	2122.83	2.09296	1.785 / 2.107 / 2.426	1	44.1448	no	nbinomial
model_30m_clx_IBP_num_sqrt_PC1_sqrt_PC2_sqrt_PC6_sqrt_PC7	1.987_x000D_ (1.491–2.468)	0.31_x000D_ (0.091–0.526)	-	-	0.189_x000D_ (0.013–0.368)	0.214_x000D_ (0.029–0.399)	-0.145_x000D_ (-0.327–0.037)	-0.066_x000D_ (-0.254–0.121)	756.228_x000D_ (424.049–1164.428)	1.038_x000D_ (0.893–1.208)	1044.69	1041.95	-3434.32	7.87556e-09	26.38	0.1319	0.997715	1.51104	4.64699	0.157073	0.483056	0.68518	970.316	1.87473	1.565 / 1.908 / 2.185	0.998534	47.4771	no	nbinomial
model_30m_clx_IBP_num_sqrt_precip_sqrt_temp_sqrt_PC1_sqrt_PC2_sqrt_PC6	1.85_x000D_ (1.37–2.322)	0.233_x000D_ (0.019–0.445)	0.079_x000D_ (-0.29–0.444)	0.434_x000D_ (0.088–0.779)	0.211_x000D_ (0.045–0.379)	0.235_x000D_ (0.071–0.4)	-0.085_x000D_ (-0.264–0.094)	-	699.468_x000D_ (568.155–881.693)	0.951_x000D_ (0.831–1.071)	1057.33	1045.3	-907.63	0.0366035	0	0	0.99587	1.78573	6.0512	0.185627	0.629023	1.40747e+46	6.99429e+52	2025.04	1974.667 / 2037.956 / 2066.537	1	34.6525	no	nbinomial
model_30m_clx_IBP_num_sqrt_precip_sqrt_temp_sqrt_PC1_sqrt_PC2_sqrt_PC7	1.841_x000D_ (1.365–2.304)	0.228_x000D_ (0.017–0.438)	0.079_x000D_ (-0.279–0.434)	0.439_x000D_ (0.102–0.776)	0.22_x000D_ (0.054–0.388)	0.204_x000D_ (0.025–0.384)	-	-0.032_x000D_ (-0.214–0.149)	633.433_x000D_ (460.243–798.574)	0.976_x000D_ (0.861–1.14)	1038.48	1031.99	-1822.56	0.000230256	0	0	0.998089	1.4327	4.32772	0.148929	0.449867	1.09952e+45	1.78288e+51	1819.29	1771.711 / 1832.063 / 1856.753	1	42.5625	no	nbinomial
model_30m_clx_IBP_num_sqrt_precip_sqrt_temp_sqrt_PC1_sqrt_PC6_sqrt_PC7	1.887_x000D_ (1.405–2.357)	0.252_x000D_ (0.037–0.465)	0.112_x000D_ (-0.244–0.465)	0.443_x000D_ (0.104–0.78)	0.166_x000D_ (-0.007–0.339)	-	-0.052_x000D_ (-0.233–0.128)	-0.134_x000D_ (-0.302–0.033)	579.307_x000D_ (403.214–794.89)	0.998_x000D_ (0.867–1.149)	1061.7	1038.56	-1536.02	0.0100549	0	0	0.997647	1.53552	5.02826	0.159617	0.522688	8.40997e+45	2.36298e+52	1752.88	1710.527 / 1762.958 / 1788.653	1	34.4831	no	nbinomial
model_30m_clx_IBP_num_sqrt_precip_sqrt_temp_sqrt_PC2_sqrt_PC6_sqrt_PC7	1.833_x000D_ (1.346–2.312)	0.226_x000D_ (0.011–0.44)	0.072_x000D_ (-0.317–0.457)	0.422_x000D_ (0.06–0.783)	-	0.18_x000D_ (0.004–0.356)	-0.151_x000D_ (-0.324–0.021)	-0.093_x000D_ (-0.269–0.082)	796.174_x000D_ (627.678–978.655)	0.978_x000D_ (0.859–1.117)	1058.74	1048.81	-949.059	0.0356721	0	0	0.995327	1.82568	6.29555	0.18978	0.654423	9.19206e+47	9.92648e+54	2041.44	1991.15 / 2054.803 / 2082.915	1	45.7961	no	nbinomial
model_30m_clx_IBP_num_sqrt_precip_sqrt_PC1_sqrt_PC2_sqrt_PC6_sqrt_PC7	1.756_x000D_ (1.254–2.248)	0.187_x000D_ (-0.033–0.406)	-0.303_x000D_ (-0.569–-0.044)	-	0.189_x000D_ (0.018–0.362)	0.236_x000D_ (0.055–0.417)	-0.129_x000D_ (-0.307–0.049)	-0.045_x000D_ (-0.228–0.138)	797.461_x000D_ (597.615–950.778)	1.006_x000D_ (0.881–1.127)	1069.09	1046.72	-998.513	0.0322731	0	0	0.994065	1.85366	6.59876	0.192688	0.685942	2.41483e+11	1042532604209756	1513.26	1479.158 / 1521.535 / 1543.608	1	117.848	no	nbinomial
model_30m_clx_IBP_num_sqrt_temp_sqrt_PC1_sqrt_PC2_sqrt_PC6_sqrt_PC7	1.827_x000D_ (1.355–2.286)	0.221_x000D_ (0.013–0.426)	-	0.372_x000D_ (0.156–0.59)	0.202_x000D_ (0.029–0.377)	0.22_x000D_ (0.038–0.403)	-0.086_x000D_ (-0.266–0.094)	-0.038_x000D_ (-0.223–0.146)	690.839_x000D_ (511.56–967.234)	0.97_x000D_ (0.845–1.1)	1070.62	1045.04	-1023.02	0.0311817	0	0	0.995761	1.77284	6.06094	0.184287	0.630035	11.1834	5294.22	2.29011	1.965 / 2.326 / 2.607	1	41.3176	no	nbinomial
model_30m_clx_IBP_num_sqrt_precip_sqrt_temp_sqrt_PC1_sqrt_PC2_sqrt_PC6_sqrt_PC7	1.855_x000D_ (1.371–2.326)	0.241_x000D_ (0.025–0.455)	0.084_x000D_ (-0.281–0.443)	0.434_x000D_ (0.091–0.774)	0.204_x000D_ (0.031–0.379)	0.216_x000D_ (0.033–0.399)	-0.083_x000D_ (-0.264–0.097)	-0.039_x000D_ (-0.224–0.145)	648.106_x000D_ (463.098–911.332)	0.958_x000D_ (0.828–1.104)	1047.75	1034.97	-1749.38	0.000683126	0	0	0.997762	1.50178	4.67398	0.15611	0.485861	6.56982e+45	2.75921e+52	1891.66	1848.6 / 1901.924 / 1929.183	1	33.6533	no	nbinomial

## Sheet: Table_S26_culex_50m
Model	Intercept	IBP_num	sqrt_precip	sqrt_temp	sqrt_PC1	sqrt_PC2	sqrt_PC5	sqrt_PC10	Range	Stdev	DIC	WAIC	LPML	CPO_median	cpo_failures	cpo_failure_rate	correlation	MAE	RMSE	MAE_rel	RMSE_rel	min_pred	max_pred	CV_mean	CV_q25_q50_q75	CV_high_prop	Time	non_zero_CrI	model_family
model_50m_clx_	1.379_x000D_ (1.121–1.635)	-	-	-	-	-	-	-	1050.829_x000D_ (899.039–1261.313)	1.096_x000D_ (0.969–1.214)	1072.2	1062.55	-849.692	0.0446526	0	0	0.99173	2.01098	7.76216	0.209042	0.806877	0.944757	184.623	1.13933	0.959 / 1.189 / 1.367	0.906431	37.5252	yes	nbinomial
model_50m_clx_IBP_num	2.033_x000D_ (1.558–2.498)	0.314_x000D_ (0.108–0.518)	-	-	-	-	-	-	819.992_x000D_ (652.573–994.471)	1.017_x000D_ (0.887–1.14)	1067.75	1059.62	-977.256	0.0324629	0	0	0.996012	1.83476	6.41931	0.190724	0.667288	0.991131	200.678	1.07519	0.964 / 1.13 / 1.236	0.909475	36.0652	yes	nbinomial
model_50m_clx_sqrt_precip	1.39_x000D_ (1.147–1.631)	-	-0.394_x000D_ (-0.651–-0.136)	-	-	-	-	-	1018.325_x000D_ (814.221–1228.505)	1.061_x000D_ (0.926–1.208)	1071.04	1062.76	-866.313	0.0450353	0	0	0.990555	2.11007	8.088	0.219342	0.840748	6.66023e+06	1.56115e+09	1031.96	1002.63 / 1039.778 / 1055.408	1	33.2972	yes	nbinomial
model_50m_clx_sqrt_temp	1.386_x000D_ (1.17–1.6)	-	-	0.456_x000D_ (0.239–0.672)	-	-	-	-	806.561_x000D_ (627.975–1014.029)	1.003_x000D_ (0.884–1.152)	1063.69	1055.22	-996.999	0.0337617	0	0	0.994547	1.91069	6.93901	0.198617	0.72131	10.2058	1106.92	1.35243	1.242 / 1.405 / 1.505	0.987994	41.4016	yes	nbinomial
model_50m_clx_sqrt_PC1	1.4_x000D_ (1.134–1.664)	-	-	-	0.173_x000D_ (0.018–0.33)	-	-	-	1164.359_x000D_ (985.973–1329.647)	1.099_x000D_ (0.981–1.229)	1076.8	1068.06	-732.419	0.0559537	0	0	0.984344	2.30822	9.35125	0.23994	0.972063	1.16968	257.767	1.13213	0.94 / 1.166 / 1.358	0.909983	40.4878	yes	nbinomial
model_50m_clx_sqrt_PC2	1.371_x000D_ (1.111–1.629)	-	-	-	-	0.265_x000D_ (0.108–0.422)	-	-	1182.743_x000D_ (1035.94–1349.059)	1.085_x000D_ (0.981–1.203)	1068.82	1061.25	-767.766	0.0485894	0	0	0.990813	2.07809	7.60858	0.216017	0.790912	1.45568	668.457	1.21597	0.974 / 1.211 / 1.434	0.929654	41.178	yes	nbinomial
model_50m_clx_sqrt_PC5	1.364_x000D_ (1.119–1.606)	-	-	-	-	-	-0.241_x000D_ (-0.416–-0.067)	-	987.457_x000D_ (854.681–1199.975)	1.065_x000D_ (0.947–1.177)	1065.56	1055.5	-895.705	0.0398065	0	0	0.995205	1.83456	6.76866	0.190703	0.703603	0.343447	91.6761	1.17656	1.01 / 1.218 / 1.366	0.932191	33.4572	yes	nbinomial
model_50m_clx_sqrt_PC10	1.465_x000D_ (1.218–1.712)	-	-	-	-	-	-	-0.246_x000D_ (-0.423–-0.07)	1234.244_x000D_ (1153.692–1323.576)	0.963_x000D_ (0.892–1.022)	1116.24	1111.69	-702.898	0.0769511	0	0	0.961561	3.48048	13.034	0.361796	1.35488	0.356782	102.027	1.02796	0.872 / 1.024 / 1.147	0.919565	42.6837	yes	nbinomial
model_50m_clx_IBP_num_sqrt_precip	1.83_x000D_ (1.313–2.33)	0.228_x000D_ (0.001–0.452)	-0.287_x000D_ (-0.541–-0.041)	-	-	-	-	-	770.704_x000D_ (488.859–1079.107)	1.036_x000D_ (0.875–1.198)	1061.36	1048.74	-1879.03	0.000145342	0	0	0.997451	1.60852	5.3138	0.167206	0.55237	9.56017e+10	4.31333e+13	1163.44	1134.601 / 1171.661 / 1189.129	1	34.2035	yes	nbinomial
model_50m_clx_IBP_num_sqrt_temp	1.9_x000D_ (1.44–2.35)	0.247_x000D_ (0.043–0.449)	-	0.375_x000D_ (0.167–0.584)	-	-	-	-	627.548_x000D_ (491.199–787.105)	0.966_x000D_ (0.85–1.107)	1061	1053.2	-1068.26	0.031041	0	0	0.997134	1.75905	5.91599	0.182854	0.614967	7.78285	867.152	1.28354	1.205 / 1.317 / 1.405	0.986585	32.9248	yes	nbinomial
model_50m_clx_IBP_num_sqrt_PC1	2.053_x000D_ (1.582–2.51)	0.337_x000D_ (0.132–0.54)	-	-	0.195_x000D_ (0.033–0.36)	-	-	-	695.359_x000D_ (527.103–931.616)	1.014_x000D_ (0.886–1.151)	1069.34	1047.92	-1279.71	0.0234613	0	0	0.997102	1.65493	5.72202	0.172031	0.594805	1.4093	305.538	1.09577	1.003 / 1.137 / 1.236	0.927625	36.0503	yes	nbinomial
model_50m_clx_IBP_num_sqrt_PC2	1.944_x000D_ (1.467–2.41)	0.285_x000D_ (0.08–0.488)	-	-	-	0.25_x000D_ (0.09–0.409)	-	-	920.294_x000D_ (734.392–1101.857)	1.016_x000D_ (0.887–1.146)	1065.94	1057.22	-896.253	0.0362208	0	0	0.995284	1.88546	6.26791	0.195993	0.65155	1.82786	676.539	1.19467	1.005 / 1.194 / 1.366	0.939068	32.5726	yes	nbinomial
model_50m_clx_IBP_num_sqrt_PC5	1.86_x000D_ (1.36–2.35)	0.239_x000D_ (0.02–0.457)	-	-	-	-	-0.172_x000D_ (-0.356–0.011)	-	860.941_x000D_ (696.371–1054.628)	1.025_x000D_ (0.906–1.162)	1065.33	1056.28	-923.545	0.0360351	0	0	0.996305	1.82288	6.34336	0.189489	0.659393	0.511505	119.826	1.13745	1.001 / 1.171 / 1.293	0.934333	38.8044	no	nbinomial
model_50m_clx_IBP_num_sqrt_PC10	1.877_x000D_ (1.384–2.36)	0.251_x000D_ (0.036–0.465)	-	-	-	-	-	-0.209_x000D_ (-0.4–-0.019)	774.94_x000D_ (615.566–946.411)	1.017_x000D_ (0.89–1.16)	1062.88	1054.61	-1050.53	0.0289406	0	0	0.997007	1.80015	5.99222	0.187126	0.622892	0.398501	127.959	1.1195	1.02 / 1.155 / 1.255	0.946057	32.6399	yes	nbinomial
model_50m_clx_IBP_num_sqrt_precip_sqrt_temp	1.916_x000D_ (1.432–2.39)	0.264_x000D_ (0.048–0.478)	0.108_x000D_ (-0.256–0.469)	0.46_x000D_ (0.118–0.801)	-	-	-	-	606.129_x000D_ (440.203–792.561)	0.987_x000D_ (0.857–1.12)	1079.62	1052.04	-1192	0.0255304	0	0	0.997271	1.72047	5.72978	0.178843	0.595612	2.18019e+47	3.41392e+53	1922.59	1871.152 / 1936.22 / 1963.591	1	30.8955	no	nbinomial
model_50m_clx_IBP_num_sqrt_precip_sqrt_PC1	1.858_x000D_ (1.368–2.337)	0.237_x000D_ (0.021–0.452)	-0.264_x000D_ (-0.5–-0.032)	-	0.184_x000D_ (0.024–0.347)	-	-	-	673.564_x000D_ (508.915–846.759)	1.028_x000D_ (0.913–1.168)	1053.83	1035.64	-1918.56	8.50152e-05	0	0	0.998461	1.37597	4.28384	0.143032	0.445306	1.79532e+10	9.08209e+12	1317.38	1282.095 / 1326.209 / 1344.98	1	43.244	yes	nbinomial
model_50m_clx_IBP_num_sqrt_precip_sqrt_PC2	1.733_x000D_ (1.237–2.219)	0.177_x000D_ (-0.04–0.392)	-0.344_x000D_ (-0.606–-0.089)	-	-	0.272_x000D_ (0.114–0.431)	-	-	906.749_x000D_ (718.824–1111.028)	0.989_x000D_ (0.856–1.125)	1063.74	1055.29	-903.691	0.038096	0	0	0.994651	1.90524	6.44325	0.19805	0.669777	2.64024e+09	1.88323e+12	1551.2	1511.767 / 1562.774 / 1582.946	1	37.9794	no	nbinomial
model_50m_clx_IBP_num_sqrt_precip_sqrt_PC5	1.634_x000D_ (1.109–2.15)	0.125_x000D_ (-0.107–0.357)	-0.326_x000D_ (-0.578–-0.078)	-	-	-	-0.202_x000D_ (-0.386–-0.019)	-	831.244_x000D_ (665.456–1031.774)	1.001_x000D_ (0.878–1.139)	1062.32	1053.58	-1003.99	0.0319999	0	0	0.996264	1.79116	6.3126	0.186192	0.656195	8.28312e+08	3.06771e+11	1380.04	1345.774 / 1388.95 / 1408.442	1	48.0908	no	nbinomial
model_50m_clx_IBP_num_sqrt_precip_sqrt_PC10	1.631_x000D_ (1.106–2.146)	0.123_x000D_ (-0.109–0.355)	-0.33_x000D_ (-0.572–-0.092)	-	-	-	-	-0.251_x000D_ (-0.443–-0.06)	709.52_x000D_ (526.987–892.74)	0.988_x000D_ (0.856–1.129)	1058.59	1051.12	-1268.06	0.0251452	0	0	0.997357	1.726	5.69546	0.179418	0.592043	2.31898e+07	9.72982e+09	1344.19	1308.919 / 1353.487 / 1372.767	1	33.5106	no	nbinomial
model_50m_clx_IBP_num_sqrt_temp_sqrt_PC1	1.881_x000D_ (1.416–2.333)	0.25_x000D_ (0.045–0.453)	-	0.365_x000D_ (0.16–0.572)	0.184_x000D_ (0.024–0.345)	-	-	-	525.943_x000D_ (336.238–762.675)	0.986_x000D_ (0.856–1.138)	1061.31	1036.97	-1797.82	0.000568679	0	0	0.998312	1.46194	4.62158	0.151969	0.480414	9.20769	1270.94	1.32658	1.242 / 1.353 / 1.453	0.989629	36.2037	yes	nbinomial
model_50m_clx_IBP_num_sqrt_temp_sqrt_PC2	1.817_x000D_ (1.347–2.274)	0.215_x000D_ (0.01–0.418)	-	0.388_x000D_ (0.174–0.606)	-	0.252_x000D_ (0.094–0.41)	-	-	744.916_x000D_ (561.951–953.631)	0.948_x000D_ (0.829–1.081)	1062.33	1052.91	-897.728	0.0384974	0	0	0.995979	1.85699	5.99757	0.193034	0.623448	15.5708	3610.24	1.47694	1.304 / 1.458 / 1.628	0.996674	37.998	yes	nbinomial
model_50m_clx_IBP_num_sqrt_temp_sqrt_PC5	1.66_x000D_ (1.166–2.144)	0.147_x000D_ (-0.072–0.365)	-	0.412_x000D_ (0.2–0.625)	-	-	-0.208_x000D_ (-0.388–-0.027)	-	625.297_x000D_ (466.172–802.528)	0.987_x000D_ (0.868–1.134)	1053.12	1036.09	-1702.2	0.00195365	0	0	0.99869	1.41367	4.19986	0.146951	0.436576	3.49143	557.355	1.34815	1.251 / 1.374 / 1.479	0.99115	44.1148	no	nbinomial
model_50m_clx_IBP_num_sqrt_temp_sqrt_PC10	1.657_x000D_ (1.17–2.135)	0.145_x000D_ (-0.073–0.361)	-	0.429_x000D_ (0.225–0.631)	-	-	-	-0.288_x000D_ (-0.481–-0.096)	474.39_x000D_ (231.204–843.528)	1.003_x000D_ (0.863–1.166)	1039.4	1028.35	-3635.18	2.4536e-09	43.9477	0.219739	0.999513	1.12032	2.50511	0.116458	0.260406	2.98977	614.275	1.31043	1.216 / 1.322 / 1.434	0.990418	32.0972	no	nbinomial
model_50m_clx_IBP_num_sqrt_PC1_sqrt_PC2	1.962_x000D_ (1.5–2.414)	0.293_x000D_ (0.094–0.491)	-	-	0.235_x000D_ (0.077–0.394)	0.291_x000D_ (0.13–0.453)	-	-	855.277_x000D_ (706.57–1032.612)	0.987_x000D_ (0.87–1.112)	1060.01	1050.17	-887.192	0.0373487	0	0	0.99491	1.8556	6.38957	0.19289	0.664196	2.15849	1762.09	1.22376	1.047 / 1.215 / 1.393	0.958683	38.9804	yes	nbinomial
model_50m_clx_IBP_num_sqrt_PC1_sqrt_PC5	1.851_x000D_ (1.353–2.339)	0.23_x000D_ (0.009–0.449)	-	-	0.2_x000D_ (0.04–0.362)	-	-0.191_x000D_ (-0.375–-0.007)	-	825.268_x000D_ (631.229–1048.721)	1.014_x000D_ (0.893–1.154)	1062.39	1052.9	-971.923	0.0340696	0	0	0.995501	1.83348	6.6546	0.19059	0.691747	0.609128	194.736	1.15458	1.026 / 1.181 / 1.301	0.947354	40.1958	yes	nbinomial
model_50m_clx_IBP_num_sqrt_PC1_sqrt_PC10	1.898_x000D_ (1.411–2.373)	0.276_x000D_ (0.062–0.488)	-	-	0.185_x000D_ (0.023–0.35)	-	-	-0.197_x000D_ (-0.389–-0.007)	659.144_x000D_ (496.134–901.87)	1.028_x000D_ (0.91–1.171)	1027.43	1024.44	-2634.24	1.55604e-06	0	0	0.99945	1.1197	2.73044	0.116393	0.28383	0.582808	218.288	1.17743	1.075 / 1.195 / 1.315	0.961389	45.6752	yes	nbinomial
model_50m_clx_IBP_num_sqrt_PC2_sqrt_PC5	1.48_x000D_ (0.999–1.961)	0.037_x000D_ (-0.145–0.219)	-	-	-	0.262_x000D_ (0.134–0.39)	-0.174_x000D_ (-0.322–-0.027)	-	1948.957_x000D_ (1905.229–1994.752)	1.09_x000D_ (1.068–1.114)	1051.6	1071.73	-990.398	0.0238475	0	0	0.990615	2.1992	7.12717	0.228607	0.74087	0.578818	745.852	1.00595	0.776 / 0.968 / 1.213	0.840201	133.445	no	nbinomial
model_50m_clx_IBP_num_sqrt_PC2_sqrt_PC10	1.863_x000D_ (1.371–2.344)	0.237_x000D_ (0.021–0.451)	-	-	-	0.223_x000D_ (0.062–0.385)	-	-0.156_x000D_ (-0.345–0.032)	878.654_x000D_ (671.051–1114.45)	1.001_x000D_ (0.877–1.158)	1068.56	1059.82	-851.624	0.0403538	0	0	0.995566	1.96041	6.37085	0.203785	0.662251	0.937331	410.178	1.25396	1.082 / 1.245 / 1.421	0.975931	32.6091	no	nbinomial
model_50m_clx_IBP_num_sqrt_PC5_sqrt_PC10	1.723_x000D_ (1.186–2.24)	0.175_x000D_ (-0.059–0.405)	-	-	-	-	-0.157_x000D_ (-0.342–0.028)	-0.191_x000D_ (-0.381–-0.003)	860.871_x000D_ (622.008–1104.896)	1.025_x000D_ (0.89–1.185)	1064.84	1055.46	-1093.12	0.028845	0	0	0.996777	1.82296	6.13394	0.189497	0.637624	0.271864	82.4459	1.19328	1.056 / 1.213 / 1.342	0.96122	30.8651	no	nbinomial
model_50m_clx_IBP_num_sqrt_precip_sqrt_temp_sqrt_PC1	1.914_x000D_ (1.436–2.38)	0.263_x000D_ (0.05–0.473)	0.111_x000D_ (-0.246–0.464)	0.447_x000D_ (0.111–0.782)	0.182_x000D_ (0.023–0.343)	-	-	-	664.57_x000D_ (486.463–887.725)	0.991_x000D_ (0.872–1.143)	1065.48	1045.45	-1128.24	0.0272327	0	0	0.997054	1.69554	5.78261	0.176252	0.601103	2.17941e+46	3.12019e+52	1784.6	1737.107 / 1797.094 / 1822.73	1	31.6504	no	nbinomial
model_50m_clx_IBP_num_sqrt_precip_sqrt_temp_sqrt_PC2	1.808_x000D_ (1.327–2.279)	0.212_x000D_ (0–0.424)	0.015_x000D_ (-0.366–0.391)	0.401_x000D_ (0.05–0.752)	-	0.252_x000D_ (0.093–0.411)	-	-	770.489_x000D_ (600.008–958.692)	0.956_x000D_ (0.838–1.091)	1061.72	1052.87	-889.253	0.0377757	0	0	0.995828	1.8584	6.01787	0.193181	0.625558	4.32798e+44	6.34757e+50	2125.54	2069.658 / 2141.35 / 2169.336	1	32.6853	no	nbinomial
model_50m_clx_IBP_num_sqrt_precip_sqrt_temp_sqrt_PC5	1.706_x000D_ (1.177–2.22)	0.167_x000D_ (-0.069–0.402)	0.075_x000D_ (-0.292–0.437)	0.468_x000D_ (0.125–0.81)	-	-	-0.202_x000D_ (-0.386–-0.018)	-	566.475_x000D_ (380.21–844.541)	0.986_x000D_ (0.842–1.127)	1068.52	1043.1	-1686.76	0.00211165	0	0	0.99839	1.50555	4.67973	0.156502	0.486459	4.79126e+45	1.01814e+52	1820.32	1773.868 / 1833.328 / 1857.583	1	32.9294	no	nbinomial
model_50m_clx_IBP_num_sqrt_precip_sqrt_temp_sqrt_PC10	1.684_x000D_ (1.181–2.179)	0.162_x000D_ (-0.068–0.389)	0.084_x000D_ (-0.259–0.423)	0.491_x000D_ (0.162–0.814)	-	-	-	-0.284_x000D_ (-0.478–-0.091)	432.713_x000D_ (191.27–814.924)	1.065_x000D_ (0.895–1.278)	1033.58	1021.21	-3536.87	2.8126e-09	31.0176	0.155088	0.999612	1.00975	2.01018	0.104964	0.208958	5.23245e+42	8.56685e+48	1793.02	1747.232 / 1805.244 / 1830.391	1	47.5154	no	nbinomial
model_50m_clx_IBP_num_sqrt_precip_sqrt_PC1_sqrt_PC2	1.725_x000D_ (1.242–2.2)	0.169_x000D_ (-0.042–0.381)	-0.333_x000D_ (-0.587–-0.082)	-	0.225_x000D_ (0.07–0.381)	0.313_x000D_ (0.154–0.474)	-	-	911.258_x000D_ (769.89–1052.745)	0.974_x000D_ (0.863–1.087)	1060.01	1050.98	-785.882	0.0475507	0	0	0.992775	1.97619	7.03674	0.205426	0.73147	2.7079e+09	2.31616e+12	1555.98	1515.785 / 1566.866 / 1587.363	1	36.0907	no	nbinomial
model_50m_clx_IBP_num_sqrt_precip_sqrt_PC1_sqrt_PC5	1.617_x000D_ (1.093–2.134)	0.116_x000D_ (-0.118–0.35)	-0.314_x000D_ (-0.563–-0.067)	-	0.197_x000D_ (0.037–0.359)	-	-0.222_x000D_ (-0.407–-0.037)	-	803.916_x000D_ (630.402–1002.877)	0.987_x000D_ (0.854–1.106)	1060.52	1049.35	-1001.63	0.0341289	0	0	0.995593	1.77082	6.48656	0.184077	0.674278	2.39623e+09	1.292e+12	1350.28	1316.919 / 1358.621 / 1378.455	1	41.2026	no	nbinomial
model_50m_clx_IBP_num_sqrt_precip_sqrt_PC1_sqrt_PC10	1.641_x000D_ (1.124–2.15)	0.134_x000D_ (-0.098–0.364)	-0.315_x000D_ (-0.551–-0.081)	-	0.169_x000D_ (0.008–0.332)	-	-	-0.238_x000D_ (-0.43–-0.046)	661.182_x000D_ (501.54–834.225)	1.001_x000D_ (0.871–1.133)	1064.35	1042.83	-1213.05	0.0262931	0	0	0.997482	1.65155	5.4784	0.171679	0.569481	4.29505e+07	2.06039e+10	1260.68	1227.744 / 1269.077 / 1287.691	1	34.3983	no	nbinomial
model_50m_clx_IBP_num_sqrt_precip_sqrt_PC2_sqrt_PC5	1.571_x000D_ (1.056–2.079)	0.096_x000D_ (-0.131–0.323)	-0.373_x000D_ (-0.634–-0.115)	-	-	0.255_x000D_ (0.096–0.414)	-0.17_x000D_ (-0.35–0.009)	-	933.475_x000D_ (792.757–1090.06)	0.987_x000D_ (0.87–1.107)	1064.43	1054.5	-802.89	0.0444787	0	0	0.995003	1.89638	6.42364	0.197129	0.667738	6.6647e+07	5.26431e+10	1495.17	1458.081 / 1505.451 / 1524.403	1	38.7251	no	nbinomial
model_50m_clx_IBP_num_sqrt_precip_sqrt_PC2_sqrt_PC10	1.576_x000D_ (1.069–2.078)	0.097_x000D_ (-0.128–0.322)	-0.374_x000D_ (-0.628–-0.123)	-	-	0.244_x000D_ (0.085–0.402)	-	-0.192_x000D_ (-0.379–-0.006)	887.436_x000D_ (691.369–1055.064)	0.986_x000D_ (0.884–1.126)	1062.33	1053.13	-847.013	0.0386842	0	0	0.995482	1.90074	6.19651	0.197582	0.644128	1.37047e+07	6.76714e+09	1367.84	1333.064 / 1377.556 / 1395.053	1	39.366	no	nbinomial
model_50m_clx_IBP_num_sqrt_precip_sqrt_PC5_sqrt_PC10	1.451_x000D_ (0.914–1.982)	0.035_x000D_ (-0.206–0.275)	-0.365_x000D_ (-0.609–-0.122)	-	-	-	-0.186_x000D_ (-0.367–-0.004)	-0.232_x000D_ (-0.421–-0.044)	775.876_x000D_ (618.832–929.318)	0.987_x000D_ (0.876–1.124)	1059	1049.9	-995.438	0.0327423	0	0	0.997205	1.74973	5.82155	0.181885	0.60515	948290	3.66646e+08	1253.74	1222.441 / 1261.749 / 1279.509	1	43.2637	no	nbinomial
model_50m_clx_IBP_num_sqrt_temp_sqrt_PC1_sqrt_PC2	1.802_x000D_ (1.341–2.253)	0.212_x000D_ (0.009–0.413)	-	0.371_x000D_ (0.159–0.585)	0.224_x000D_ (0.067–0.382)	0.29_x000D_ (0.13–0.45)	-	-	690.889_x000D_ (522.645–880.257)	0.967_x000D_ (0.843–1.104)	1059.79	1038.97	-1177.59	0.026502	0	0	0.996637	1.67922	5.41115	0.174556	0.56249	19.141	6489.12	1.49624	1.322 / 1.476 / 1.656	0.997802	44.4975	yes	nbinomial
model_50m_clx_IBP_num_sqrt_temp_sqrt_PC1_sqrt_PC5	1.666_x000D_ (1.168–2.151)	0.143_x000D_ (-0.079–0.362)	-	0.401_x000D_ (0.192–0.611)	0.199_x000D_ (0.04–0.36)	-	-0.225_x000D_ (-0.407–-0.043)	-	632.584_x000D_ (453.27–850.895)	0.951_x000D_ (0.82–1.086)	1051.13	1042.95	-1309.29	0.0228644	0	0	0.997353	1.63832	5.57625	0.170303	0.579652	4.07228	704.915	1.35638	1.258 / 1.375 / 1.481	0.99442	42.4239	no	nbinomial
model_50m_clx_IBP_num_sqrt_temp_sqrt_PC1_sqrt_PC10	1.659_x000D_ (1.173–2.133)	0.15_x000D_ (-0.066–0.365)	-	0.415_x000D_ (0.213–0.615)	0.164_x000D_ (0.003–0.327)	-	-	-0.269_x000D_ (-0.462–-0.079)	442.349_x000D_ (206.442–827.724)	1.062_x000D_ (0.885–1.292)	1031.21	1018.44	-3509.38	3.22115e-09	30.1069	0.150535	0.999564	1.06291	2.29669	0.11049	0.238741	3.8462	852.612	1.31584	1.214 / 1.323 / 1.44	0.992729	38.8321	no	nbinomial
model_50m_clx_IBP_num_sqrt_temp_sqrt_PC2_sqrt_PC5	1.653_x000D_ (1.154–2.141)	0.137_x000D_ (-0.082–0.354)	-	0.415_x000D_ (0.198–0.634)	-	0.232_x000D_ (0.073–0.39)	-0.174_x000D_ (-0.353–0.006)	-	662.353_x000D_ (496.924–861.023)	0.959_x000D_ (0.83–1.096)	1075.56	1049.14	-1160.76	0.0262954	0	0	0.996888	1.75273	5.52271	0.182196	0.574087	7.63725	3199.51	1.53837	1.351 / 1.518 / 1.711	0.998478	41.8192	no	nbinomial
model_50m_clx_IBP_num_sqrt_temp_sqrt_PC2_sqrt_PC10	1.675_x000D_ (1.195–2.147)	0.146_x000D_ (-0.068–0.359)	-	0.421_x000D_ (0.216–0.625)	-	0.208_x000D_ (0.047–0.37)	-	-0.231_x000D_ (-0.42–-0.042)	598.275_x000D_ (449.172–775.06)	0.937_x000D_ (0.816–1.071)	1050.88	1042.25	-1245.09	0.0237445	0	0	0.998249	1.59273	4.55744	0.165564	0.473746	5.67154	2720.58	1.46207	1.293 / 1.443 / 1.613	0.998704	42.2375	no	nbinomial
model_50m_clx_IBP_num_sqrt_temp_sqrt_PC5_sqrt_PC10	1.483_x000D_ (0.963–1.986)	0.062_x000D_ (-0.169–0.29)	-	0.457_x000D_ (0.252–0.662)	-	-	-0.183_x000D_ (-0.364–-0.002)	-0.268_x000D_ (-0.458–-0.08)	606.112_x000D_ (288.545–1102.189)	0.973_x000D_ (0.839–1.126)	1038.33	1028.13	-2182.62	1.8214e-05	0	0	0.999316	1.25088	3.19724	0.130029	0.332353	1.79895	391.368	1.33788	1.236 / 1.347 / 1.463	0.994251	43.9545	no	nbinomial
model_50m_clx_IBP_num_sqrt_PC1_sqrt_PC2_sqrt_PC5	1.789_x000D_ (1.291–2.277)	0.208_x000D_ (-0.007–0.421)	-	-	0.241_x000D_ (0.085–0.399)	0.276_x000D_ (0.115–0.438)	-0.162_x000D_ (-0.343–0.018)	-	931.289_x000D_ (739.818–1150.416)	0.995_x000D_ (0.869–1.131)	1057.65	1048.68	-947.695	0.0356934	0	0	0.99487	1.83868	6.37354	0.191131	0.66253	1.11392	1196.04	1.30885	1.103 / 1.293 / 1.509	0.978355	37.4729	no	nbinomial
model_50m_clx_IBP_num_sqrt_PC1_sqrt_PC2_sqrt_PC10	1.866_x000D_ (1.378–2.342)	0.246_x000D_ (0.034–0.456)	-	-	0.223_x000D_ (0.064–0.384)	0.269_x000D_ (0.104–0.434)	-	-0.13_x000D_ (-0.32–0.059)	848.182_x000D_ (678.919–1047.76)	0.988_x000D_ (0.87–1.123)	1059.55	1049.22	-904.71	0.037037	0	0	0.995573	1.84373	6.1805	0.191656	0.642464	1.62517	1101.31	1.33313	1.144 / 1.321 / 1.515	0.988783	38.7034	no	nbinomial
model_50m_clx_IBP_num_sqrt_PC1_sqrt_PC5_sqrt_PC10	1.734_x000D_ (1.21–2.243)	0.186_x000D_ (-0.043–0.412)	-	-	0.194_x000D_ (0.032–0.356)	-	-0.175_x000D_ (-0.362–0.012)	-0.175_x000D_ (-0.366–0.015)	756.983_x000D_ (569.502–995.29)	1.013_x000D_ (0.878–1.165)	1052.69	1039.96	-1472.8	0.0131301	0	0	0.998049	1.53088	4.92143	0.159135	0.511583	0.342081	136.849	1.23987	1.107 / 1.247 / 1.389	0.974184	40.9711	no	nbinomial
model_50m_clx_IBP_num_sqrt_PC2_sqrt_PC5_sqrt_PC10	1.741_x000D_ (1.225–2.247)	0.185_x000D_ (-0.04–0.408)	-	-	-	0.211_x000D_ (0.047–0.375)	-0.13_x000D_ (-0.314–0.053)	-0.149_x000D_ (-0.339–0.041)	899.43_x000D_ (754.794–1080.819)	0.998_x000D_ (0.871–1.122)	1066.85	1056.53	-835.529	0.0405717	0	0	0.996318	1.85407	5.9911	0.192731	0.622775	0.659039	332.044	1.37719	1.168 / 1.36 / 1.583	0.988163	32.8666	no	nbinomial
model_50m_clx_IBP_num_sqrt_precip_sqrt_temp_sqrt_PC1_sqrt_PC2	1.816_x000D_ (1.335–2.284)	0.213_x000D_ (0.001–0.423)	0.014_x000D_ (-0.36–0.381)	0.381_x000D_ (0.035–0.725)	0.222_x000D_ (0.065–0.38)	0.288_x000D_ (0.126–0.451)	-	-	740.104_x000D_ (587.54–944.196)	0.938_x000D_ (0.821–1.071)	1057.2	1047.16	-904.585	0.037966	0	0	0.995342	1.84212	6.19611	0.191488	0.644086	3.92438e+43	6.81706e+49	2103.45	2048.54 / 2118.648 / 2147.121	1	39.3605	no	nbinomial
model_50m_clx_IBP_num_sqrt_precip_sqrt_temp_sqrt_PC1_sqrt_PC5	1.688_x000D_ (1.176–2.188)	0.156_x000D_ (-0.074–0.384)	0.076_x000D_ (-0.282–0.431)	0.457_x000D_ (0.121–0.792)	0.199_x000D_ (0.04–0.36)	-	-0.222_x000D_ (-0.405–-0.039)	-	638.054_x000D_ (487.308–820.099)	0.957_x000D_ (0.833–1.091)	1049.25	1041.31	-1277.91	0.0232632	0	0	0.997566	1.60471	5.38494	0.16681	0.559765	2.98127e+44	7.3526e+50	1792.7	1746.041 / 1804.696 / 1830.241	1	36.8938	no	nbinomial
model_50m_clx_IBP_num_sqrt_precip_sqrt_temp_sqrt_PC1_sqrt_PC10	1.687_x000D_ (1.174–2.186)	0.165_x000D_ (-0.064–0.392)	0.089_x000D_ (-0.255–0.429)	0.482_x000D_ (0.155–0.807)	0.165_x000D_ (0.003–0.329)	-	-	-0.265_x000D_ (-0.459–-0.074)	483.888_x000D_ (239.423–850.65)	1.001_x000D_ (0.866–1.154)	1037.22	1024.39	-3612.53	2.9662e-09	42.1702	0.210851	0.999466	1.13608	2.64165	0.118096	0.274599	2.40035e+43	4.65775e+49	1596.61	1555.508 / 1607.568 / 1629.193	1	46.0093	no	nbinomial
model_50m_clx_IBP_num_sqrt_precip_sqrt_temp_sqrt_PC2_sqrt_PC5	1.633_x000D_ (1.123–2.135)	0.128_x000D_ (-0.098–0.354)	-0.008_x000D_ (-0.39–0.37)	0.41_x000D_ (0.057–0.762)	-	0.233_x000D_ (0.074–0.392)	-0.175_x000D_ (-0.354–0.004)	-	788.062_x000D_ (625.231–983.208)	0.953_x000D_ (0.834–1.088)	1057.35	1048.81	-977.384	0.0326925	0	0	0.996721	1.75649	5.57072	0.182587	0.579077	1.90217e+43	4.47595e+49	2108.81	2054.138 / 2123.977 / 2151.892	1	36.1838	no	nbinomial
model_50m_clx_IBP_num_sqrt_precip_sqrt_temp_sqrt_PC2_sqrt_PC10	1.636_x000D_ (1.129–2.134)	0.133_x000D_ (-0.094–0.358)	0.008_x000D_ (-0.361–0.372)	0.431_x000D_ (0.087–0.773)	-	0.216_x000D_ (0.053–0.378)	-	-0.222_x000D_ (-0.412–-0.032)	670.826_x000D_ (487.351–813.623)	0.951_x000D_ (0.827–1.069)	1055.63	1044.54	-971.473	0.0345747	0	0	0.9976	1.67277	4.99393	0.173884	0.51912	3.474e+42	5.64497e+48	2081.9	2027.521 / 2097.193 / 2124.255	1	33.209	no	nbinomial
model_50m_clx_IBP_num_sqrt_precip_sqrt_temp_sqrt_PC5_sqrt_PC10	1.503_x000D_ (0.978–2.019)	0.065_x000D_ (-0.172–0.3)	0.047_x000D_ (-0.3–0.392)	0.488_x000D_ (0.161–0.815)	-	-	-0.183_x000D_ (-0.363–-0.003)	-0.259_x000D_ (-0.446–-0.073)	553.851_x000D_ (399.904–718.85)	0.968_x000D_ (0.855–1.125)	1061.44	1041.36	-1217.29	0.0252644	0	0	0.998463	1.58288	4.75951	0.164541	0.494752	1.98915e+41	2.41632e+47	1751.41	1705.731 / 1763.298 / 1787.689	1	35.8095	no	nbinomial
model_50m_clx_IBP_num_sqrt_precip_sqrt_PC1_sqrt_PC2_sqrt_PC5	1.552_x000D_ (1.044–2.052)	0.088_x000D_ (-0.136–0.311)	-0.362_x000D_ (-0.615–-0.115)	-	0.237_x000D_ (0.085–0.392)	0.296_x000D_ (0.137–0.455)	-0.191_x000D_ (-0.368–-0.013)	-	890.873_x000D_ (726.69–1084.667)	0.961_x000D_ (0.851–1.098)	1056.16	1046.2	-840.96	0.0419225	0	0	0.994225	1.88344	6.58757	0.195784	0.684779	1.13393e+07	1.75591e+10	1516.37	1479.323 / 1526.651 / 1546.969	1	41.0687	no	nbinomial
model_50m_clx_IBP_num_sqrt_precip_sqrt_PC1_sqrt_PC2_sqrt_PC10	1.598_x000D_ (1.094–2.097)	0.109_x000D_ (-0.114–0.331)	-0.355_x000D_ (-0.603–-0.11)	-	0.211_x000D_ (0.055–0.367)	0.285_x000D_ (0.122–0.447)	-	-0.166_x000D_ (-0.354–0.021)	850.243_x000D_ (709.39–988.495)	0.964_x000D_ (0.863–1.082)	1056.61	1046.01	-834.79	0.0411356	0	0	0.995006	1.87279	6.32062	0.194677	0.657029	2.40286e+07	1.77673e+10	1511.07	1472.43 / 1521.066 / 1541.391	1	34.6316	no	nbinomial
model_50m_clx_IBP_num_sqrt_precip_sqrt_PC1_sqrt_PC5_sqrt_PC10	1.438_x000D_ (0.885–1.981)	0.042_x000D_ (-0.204–0.287)	-0.352_x000D_ (-0.594–-0.116)	-	0.184_x000D_ (0.026–0.345)	-	-0.207_x000D_ (-0.391–-0.022)	-0.221_x000D_ (-0.412–-0.031)	604.37_x000D_ (298.555–1036.861)	0.982_x000D_ (0.841–1.141)	1036.14	1029.66	-2117.14	3.14355e-05	0	0	0.998852	1.33996	3.89932	0.139289	0.405335	1.09162e+06	5.84113e+08	1138.61	1113.327 / 1145.699 / 1164.583	1	46.856	no	nbinomial
model_50m_clx_IBP_num_sqrt_precip_sqrt_PC2_sqrt_PC5_sqrt_PC10	1.449_x000D_ (0.913–1.977)	0.039_x000D_ (-0.2–0.278)	-0.39_x000D_ (-0.64–-0.145)	-	-	0.225_x000D_ (0.064–0.386)	-0.161_x000D_ (-0.341–0.02)	-0.19_x000D_ (-0.379–-0.002)	833.566_x000D_ (677.385–1050.081)	0.971_x000D_ (0.849–1.106)	1055.7	1046	-1006.26	0.0309381	0	0	0.997309	1.68187	5.23149	0.174831	0.543814	252068	1.51785e+08	1370.88	1336.993 / 1380.337 / 1399.371	1	39.9988	no	nbinomial
model_50m_clx_IBP_num_sqrt_temp_sqrt_PC1_sqrt_PC2_sqrt_PC5	1.593_x000D_ (1.081–2.086)	0.113_x000D_ (-0.109–0.332)	-	0.406_x000D_ (0.188–0.628)	0.235_x000D_ (0.081–0.391)	0.274_x000D_ (0.115–0.434)	-0.197_x000D_ (-0.375–-0.019)	-	770.014_x000D_ (533.762–1043.49)	0.942_x000D_ (0.819–1.093)	1039.78	1038.94	-1933.92	0.00010551	0	0	0.996584	1.68602	5.44366	0.175261	0.565869	7.18257	4927.98	1.60574	1.399 / 1.585 / 1.797	0.999493	39.1716	no	nbinomial
model_50m_clx_IBP_num_sqrt_temp_sqrt_PC1_sqrt_PC2_sqrt_PC10	1.688_x000D_ (1.203–2.162)	0.147_x000D_ (-0.066–0.36)	-	0.399_x000D_ (0.193–0.607)	0.202_x000D_ (0.044–0.363)	0.25_x000D_ (0.086–0.414)	-	-0.194_x000D_ (-0.384–-0.005)	545.011_x000D_ (408.788–712.52)	0.947_x000D_ (0.826–1.08)	1075.57	1043.98	-1291.42	0.0214179	0	0	0.997037	1.75306	5.48106	0.182231	0.569757	8.07784	3773.21	1.52208	1.34 / 1.503 / 1.687	0.999831	34.9959	no	nbinomial
model_50m_clx_IBP_num_sqrt_temp_sqrt_PC1_sqrt_PC5_sqrt_PC10	1.478_x000D_ (0.972–1.975)	0.053_x000D_ (-0.174–0.278)	-	0.44_x000D_ (0.235–0.646)	0.178_x000D_ (0.02–0.338)	-	-0.204_x000D_ (-0.385–-0.024)	-0.241_x000D_ (-0.429–-0.054)	552.554_x000D_ (391.14–722.402)	0.957_x000D_ (0.832–1.093)	1058.5	1034.9	-1342.73	0.0179436	0	0	0.998414	1.52371	4.67459	0.15839	0.485924	2.08436	492.833	1.3451	1.241 / 1.351 / 1.465	0.997125	35.239	no	nbinomial
model_50m_clx_IBP_num_sqrt_temp_sqrt_PC2_sqrt_PC5_sqrt_PC10	1.511_x000D_ (1.005–2.01)	0.068_x000D_ (-0.159–0.293)	-	0.446_x000D_ (0.235–0.656)	-	0.196_x000D_ (0.035–0.357)	-0.161_x000D_ (-0.341–0.018)	-0.214_x000D_ (-0.402–-0.027)	628.765_x000D_ (480.413–795.059)	0.956_x000D_ (0.833–1.092)	1069.47	1044.02	-1123.15	0.0265756	0	0	0.997902	1.65735	4.89314	0.172281	0.508642	3.73642	2707.57	1.52642	1.345 / 1.508 / 1.698	0.999662	32.6195	no	nbinomial
model_50m_clx_IBP_num_sqrt_PC1_sqrt_PC2_sqrt_PC5_sqrt_PC10	1.74_x000D_ (1.232–2.237)	0.176_x000D_ (-0.048–0.396)	-	-	0.229_x000D_ (0.072–0.387)	0.258_x000D_ (0.094–0.421)	-0.15_x000D_ (-0.33–0.03)	-0.116_x000D_ (-0.304–0.071)	947.784_x000D_ (776.103–1180.96)	0.973_x000D_ (0.859–1.119)	1071.25	1061.4	-708.802	0.0573987	0	0	0.992365	2.15131	7.62521	0.223629	0.792641	1.00245	839.313	1.36853	1.162 / 1.353 / 1.568	0.993292	38.0876	no	nbinomial
model_50m_clx_IBP_num_sqrt_precip_sqrt_temp_sqrt_PC1_sqrt_PC2_sqrt_PC5	1.602_x000D_ (1.083–2.109)	0.112_x000D_ (-0.116–0.339)	-0.018_x000D_ (-0.401–0.356)	0.389_x000D_ (0.039–0.738)	0.233_x000D_ (0.078–0.39)	0.273_x000D_ (0.111–0.435)	-0.195_x000D_ (-0.374–-0.016)	-	796.684_x000D_ (603.037–985.77)	0.946_x000D_ (0.814–1.091)	1044.36	1040.46	-1477.24	0.00767212	0	0	0.996503	1.68197	5.47258	0.174841	0.568875	3.25401e+42	1.43984e+49	2089.13	2036.358 / 2104.565 / 2132.485	1	32.8945	no	nbinomial
model_50m_clx_IBP_num_sqrt_precip_sqrt_temp_sqrt_PC1_sqrt_PC2_sqrt_PC10	1.626_x000D_ (0.657–2.151)	0.146_x000D_ (-0.081–0.386)	-0.004_x000D_ (-0.394–0.362)	0.415_x000D_ (0.069–0.776)	0.212_x000D_ (0.046–0.433)	0.262_x000D_ (0.091–0.464)	-	-0.201_x000D_ (-0.5–-0.002)	680.795_x000D_ (547.024–827.468)	0.934_x000D_ (0.822–1.058)	1209.62	2965.16	-4424.88	1.47058e-10	0	0	0.996793	2.35473	5.75576	0.244774	0.598311	3.46439e+42	3.99204e+48	2785.01	2699.535 / 2784.696 / 2867.527	1	37.5589	no	nbinomial
model_50m_clx_IBP_num_sqrt_precip_sqrt_temp_sqrt_PC1_sqrt_PC5_sqrt_PC10	1.503_x000D_ (0.981–2.018)	0.061_x000D_ (-0.175–0.296)	0.049_x000D_ (-0.297–0.394)	0.474_x000D_ (0.146–0.801)	0.177_x000D_ (0.019–0.338)	-	-0.202_x000D_ (-0.383–-0.021)	-0.237_x000D_ (-0.425–-0.049)	585.757_x000D_ (456.272–721.089)	0.954_x000D_ (0.842–1.084)	1065.66	1041.21	-1042.73	0.0295296	0	0	0.997828	1.66014	5.33248	0.172571	0.554311	3.18404e+41	4.87706e+47	1832.85	1784.426 / 1843.978 / 1871.63	1	34.2254	no	nbinomial
model_50m_clx_IBP_num_sqrt_precip_sqrt_temp_sqrt_PC2_sqrt_PC5_sqrt_PC10	1.486_x000D_ (0.959–2.005)	0.06_x000D_ (-0.177–0.296)	-0.012_x000D_ (-0.377–0.35)	0.44_x000D_ (0.099–0.78)	-	0.2_x000D_ (0.038–0.362)	-0.164_x000D_ (-0.344–0.016)	-0.212_x000D_ (-0.401–-0.025)	651.481_x000D_ (506.614–809.849)	0.953_x000D_ (0.835–1.083)	1066.39	1043.52	-1048.13	0.0291212	0	0	0.997797	1.65379	4.90951	0.171911	0.510344	7.843e+40	1.29813e+47	2009.59	1957.489 / 2023.683 / 2050.841	1	39.4477	no	nbinomial
model_50m_clx_IBP_num_sqrt_precip_sqrt_PC1_sqrt_PC2_sqrt_PC5_sqrt_PC10	1.433_x000D_ (0.906–1.951)	0.026_x000D_ (-0.207–0.258)	-0.385_x000D_ (-0.636–-0.138)	-	0.22_x000D_ (0.067–0.375)	0.27_x000D_ (0.11–0.43)	-0.181_x000D_ (-0.358–-0.005)	-0.152_x000D_ (-0.337–0.032)	890.936_x000D_ (722.125–1069.047)	0.97_x000D_ (0.863–1.134)	1052.84	1044.1	-897.024	0.0366503	0	0	0.995257	1.84988	6.22593	0.192295	0.647186	662768	6.84732e+08	1385.11	1351.306 / 1394.245 / 1413.351	1	47.3714	no	nbinomial
model_50m_clx_IBP_num_sqrt_temp_sqrt_PC1_sqrt_PC2_sqrt_PC5_sqrt_PC10	1.488_x000D_ (0.983–1.984)	0.061_x000D_ (-0.164–0.284)	-	0.43_x000D_ (0.22–0.643)	0.217_x000D_ (0.06–0.375)	0.24_x000D_ (0.078–0.402)	-0.184_x000D_ (-0.362–-0.006)	-0.178_x000D_ (-0.366–0.008)	692.829_x000D_ (544.59–852.28)	0.927_x000D_ (0.814–1.055)	1047.6	1036.68	-1007.44	0.0327397	0	0	0.997271	1.66462	5.18691	0.173037	0.53918	6.62657	3962.1	1.57554	1.385 / 1.562 / 1.757	0.999944	42.6334	no	nbinomial
model_50m_clx_IBP_num_sqrt_precip_sqrt_temp_sqrt_PC1_sqrt_PC2_sqrt_PC5_sqrt_PC10	1.463_x000D_ (0.936–1.981)	0.051_x000D_ (-0.185–0.286)	-0.025_x000D_ (-0.395–0.338)	0.414_x000D_ (0.071–0.754)	0.217_x000D_ (0.061–0.375)	0.243_x000D_ (0.08–0.407)	-0.186_x000D_ (-0.365–-0.008)	-0.176_x000D_ (-0.364–0.01)	656.334_x000D_ (474.44–853.493)	0.945_x000D_ (0.826–1.084)	1060.75	1034.51	-1307.41	0.0199232	0	0	0.997498	1.60726	4.9239	0.167075	0.51184	4.04086e+40	8.16888e+46	2019.52	1968.186 / 2033.782 / 2060.748	1	49.103	no	nbinomial

## Sheet: Table_S27_culex_100m
Model	Intercept	IBP_num	sqrt_precip	sqrt_temp	sqrt_PC2	sqrt_PC5	sqrt_PC7	sqrt_PC10	Range	Stdev	DIC	WAIC	LPML	CPO_median	cpo_failures	cpo_failure_rate	correlation	MAE	RMSE	MAE_rel	RMSE_rel	min_pred	max_pred	CV_mean	CV_q25_q50_q75	CV_high_prop	Time	non_zero_CrI	model_family
model_100m_clx_	1.383_x000D_ (1.124–1.639)	-	-	-	-	-	-	-	1097.343_x000D_ (965.502–1242.804)	1.1_x000D_ (0.992–1.226)	1070.44	1063.03	-812.897	0.0455276	0	0	0.990668	2.0713	8.01537	0.215312	0.833198	0.936936	182.93	1.13915	0.923 / 1.149 / 1.335	0.895214	40.1285	yes	nbinomial
model_100m_clx_IBP_num	2.036_x000D_ (1.556–2.503)	0.33_x000D_ (0.122–0.537)	-	-	-	-	-	-	735.015_x000D_ (547.575–961.654)	1.048_x000D_ (0.908–1.199)	1073.92	1052.25	-1401.63	0.0177472	0	0	0.997335	1.6653	5.57152	0.173108	0.579161	0.990389	207.956	1.07827	0.975 / 1.132 / 1.234	0.910659	33.5953	yes	nbinomial
model_100m_clx_sqrt_precip	1.383_x000D_ (1.148–1.613)	-	-0.384_x000D_ (-0.631–-0.139)	-	-	-	-	-	937.586_x000D_ (771.277–1141.352)	1.039_x000D_ (0.912–1.184)	1067.93	1059.14	-915.729	0.0388557	0	0	0.992805	1.98364	7.4941	0.2062	0.779013	740867	1.73067e+08	1130.54	1097.834 / 1139.609 / 1155.879	1	28.3637	yes	nbinomial
model_100m_clx_sqrt_temp	1.385_x000D_ (1.158–1.606)	-	-	0.456_x000D_ (0.235–0.678)	-	-	-	-	830.358_x000D_ (661.383–1019.127)	1.003_x000D_ (0.878–1.14)	1062.49	1055.13	-1077.46	0.0293717	0	0	0.994327	1.90461	6.96456	0.197985	0.723966	9.81785	1110.41	1.38991	1.268 / 1.445 / 1.552	0.989854	35.0907	yes	nbinomial
model_100m_clx_sqrt_PC2	1.366_x000D_ (1.094–1.637)	-	-	-	0.311_x000D_ (0.147–0.476)	-	-	-	1236.432_x000D_ (1085.143–1399.068)	1.101_x000D_ (0.985–1.213)	1065.11	1057.67	-796.481	0.0454613	0	0	0.991853	2.02297	7.20522	0.210288	0.748983	1.92874	839.937	1.24724	0.989 / 1.234 / 1.482	0.933431	76.2503	yes	nbinomial
model_100m_clx_sqrt_PC5	1.376_x000D_ (1.125–1.626)	-	-	-	-	-0.207_x000D_ (-0.381–-0.033)	-	-	1038.498_x000D_ (873.736–1217.953)	1.073_x000D_ (0.957–1.205)	1070.89	1062.15	-819.671	0.0451298	0	0	0.991886	2.03848	7.90427	0.2119	0.82165	0.419819	102.104	1.16554	0.99 / 1.203 / 1.366	0.930105	35.0409	yes	nbinomial
model_100m_clx_sqrt_PC7	1.367_x000D_ (1.118–1.615)	-	-	-	-	-	-0.182_x000D_ (-0.349–-0.014)	-	1041.528_x000D_ (886.855–1212.388)	1.077_x000D_ (0.969–1.221)	1070.75	1061.93	-829.896	0.0428162	0	0	0.99192	2.03652	7.71211	0.211697	0.801675	0.42321	83.8016	1.22468	1.061 / 1.264 / 1.407	0.962911	40.3937	yes	nbinomial
model_100m_clx_sqrt_PC10	1.37_x000D_ (1.141–1.598)	-	-	-	-	-	-	-0.415_x000D_ (-0.599–-0.232)	921.345_x000D_ (752.878–1096.34)	1.012_x000D_ (0.894–1.142)	1061.7	1054.56	-943.177	0.0341284	0	0	0.994914	1.92338	6.84131	0.199935	0.711155	0.174526	51.364	1.10313	0.978 / 1.141 / 1.246	0.937038	33.9736	yes	nbinomial
model_100m_clx_IBP_num_sqrt_precip	1.846_x000D_ (1.355–2.331)	0.229_x000D_ (0.012–0.445)	-0.278_x000D_ (-0.524–-0.034)	-	-	-	-	-	794.56_x000D_ (654.508–950.924)	1.005_x000D_ (0.886–1.137)	1066.29	1057.19	-923.395	0.0375671	0	0	0.995526	1.86669	6.64716	0.194043	0.690973	8.58942e+10	3.7593e+13	1345.31	1309.908 / 1354.443 / 1372.818	1	37.0241	yes	nbinomial
model_100m_clx_IBP_num_sqrt_temp	1.873_x000D_ (1.405–2.331)	0.244_x000D_ (0.037–0.449)	-	0.378_x000D_ (0.166–0.591)	-	-	-	-	630.239_x000D_ (477.693–819.497)	0.986_x000D_ (0.859–1.12)	1068.23	1047.43	-1199.41	0.0255468	0	0	0.997678	1.62929	5.35908	0.169364	0.557077	7.51332	901.2	1.32971	1.245 / 1.366 / 1.46	0.98805	35.3149	yes	nbinomial
model_100m_clx_IBP_num_sqrt_PC2	1.899_x000D_ (1.422–2.366)	0.261_x000D_ (0.058–0.464)	-	-	0.279_x000D_ (0.115–0.444)	-	-	-	1148.646_x000D_ (934.275–1400.748)	1.035_x000D_ (0.912–1.184)	1062.92	1056.41	-962.713	0.0335855	0	0	0.995312	1.8995	6.30051	0.197453	0.654939	2.15263	759.449	1.18868	1.004 / 1.193 / 1.367	0.940533	37.9062	yes	nbinomial
model_100m_clx_IBP_num_sqrt_PC5	1.867_x000D_ (1.361–2.364)	0.246_x000D_ (0.027–0.464)	-	-	-	-0.144_x000D_ (-0.329–0.041)	-	-	883.955_x000D_ (699.689–1050.254)	1.038_x000D_ (0.913–1.167)	1067.47	1057.94	-917.983	0.0378711	0	0	0.995339	1.87218	6.73119	0.194613	0.699708	0.600447	133.358	1.1542	1.013 / 1.194 / 1.319	0.937602	34.8842	no	nbinomial
model_100m_clx_IBP_num_sqrt_PC7	1.901_x000D_ (1.412–2.383)	0.264_x000D_ (0.053–0.474)	-	-	-	-	-0.145_x000D_ (-0.318–0.028)	-	872.236_x000D_ (733.624–996.263)	1.045_x000D_ (0.92–1.155)	1067.25	1057.35	-903.819	0.0370396	0	0	0.995551	1.84289	6.48623	0.191568	0.674244	0.531203	108.478	1.23339	1.107 / 1.269 / 1.392	0.970351	40.2968	no	nbinomial
model_100m_clx_IBP_num_sqrt_PC10	1.723_x000D_ (1.204–2.225)	0.177_x000D_ (-0.05–0.401)	-	-	-	-	-	-0.367_x000D_ (-0.566–-0.169)	752.377_x000D_ (377.298–1253.565)	0.989_x000D_ (0.834–1.145)	1056.71	1043.9	-1773.86	0.00104798	0	0	0.998093	1.5623	4.91707	0.162402	0.51113	0.222579	66.5421	1.12286	1.027 / 1.156 / 1.256	0.950116	34.3791	no	nbinomial
model_100m_clx_IBP_num_sqrt_precip_sqrt_temp	1.934_x000D_ (1.454–2.404)	0.272_x000D_ (0.057–0.485)	0.136_x000D_ (-0.226–0.497)	0.48_x000D_ (0.137–0.822)	-	-	-	-	606.259_x000D_ (451.293–808.919)	0.971_x000D_ (0.85–1.106)	1063.39	1050.97	-1133.26	0.027366	0	0	0.997534	1.69142	5.5865	0.175824	0.580717	5.00157e+48	1.0787e+55	1845.12	1796.026 / 1857.792 / 1884.644	1	40.4069	no	nbinomial
model_100m_clx_IBP_num_sqrt_precip_sqrt_PC2	1.684_x000D_ (1.186–2.174)	0.152_x000D_ (-0.063–0.367)	-0.336_x000D_ (-0.606–-0.072)	-	0.299_x000D_ (0.135–0.464)	-	-	-	975.36_x000D_ (801.034–1174.83)	1.001_x000D_ (0.88–1.128)	1063.59	1054.64	-833.057	0.0428738	0	0	0.99436	1.93703	6.55544	0.201354	0.681438	8.41149e+10	6.85278e+13	1659.5	1617.413 / 1671.304 / 1693.029	1	40.1622	no	nbinomial
model_100m_clx_IBP_num_sqrt_precip_sqrt_PC5	1.67_x000D_ (1.136–2.191)	0.146_x000D_ (-0.09–0.381)	-0.316_x000D_ (-0.571–-0.066)	-	-	-0.174_x000D_ (-0.359–0.01)	-	-	822.484_x000D_ (603.14–1082.905)	1.006_x000D_ (0.86–1.162)	1065.63	1055.31	-1038.59	0.030774	0	0	0.995738	1.81043	6.54936	0.188194	0.680807	8.20511e+09	2.97846e+12	1252.74	1222.125 / 1261.151 / 1279.279	1	46.0645	no	nbinomial
model_100m_clx_IBP_num_sqrt_precip_sqrt_PC7	1.744_x000D_ (1.242–2.24)	0.178_x000D_ (-0.044–0.399)	-0.281_x000D_ (-0.532–-0.033)	-	-	-	-0.147_x000D_ (-0.316–0.022)	-	834.888_x000D_ (668.478–995.743)	1.008_x000D_ (0.888–1.139)	1064.72	1056.21	-950.769	0.0361491	0	0	0.995323	1.86189	6.61072	0.193543	0.687185	1.05144e+11	4.79355e+13	1307.96	1273.886 / 1316.792 / 1334.487	1	39.8049	no	nbinomial
model_100m_clx_IBP_num_sqrt_precip_sqrt_PC10	1.473_x000D_ (0.956–1.98)	0.058_x000D_ (-0.174–0.289)	-0.339_x000D_ (-0.563–-0.118)	-	-	-	-	-0.423_x000D_ (-0.622–-0.226)	657.347_x000D_ (308.765–1211.239)	0.987_x000D_ (0.828–1.174)	1057.34	1032.74	-3128.66	1.16579e-08	2.27727	0.0113863	0.999088	1.30911	3.57241	0.136082	0.371352	46234.5	1.61322e+07	961.363	936.894 / 967.999 / 984.089	1	38.387	no	nbinomial
model_100m_clx_IBP_num_sqrt_temp_sqrt_PC2	1.744_x000D_ (1.26–2.211)	0.183_x000D_ (-0.029–0.392)	-	0.388_x000D_ (0.164–0.618)	0.274_x000D_ (0.111–0.438)	-	-	-	816.676_x000D_ (549.338–1080.279)	0.961_x000D_ (0.825–1.106)	1049.75	1051.76	-2371.03	1.33917e-05	0	0	0.996059	1.82278	5.81688	0.189478	0.604665	18.3699	3090.55	1.57878	1.378 / 1.569 / 1.76	0.998309	39.1155	no	nbinomial
model_100m_clx_IBP_num_sqrt_temp_sqrt_PC5	1.704_x000D_ (1.206–2.191)	0.16_x000D_ (-0.06–0.379)	-	0.412_x000D_ (0.199–0.627)	-	-0.183_x000D_ (-0.366–-0.001)	-	-	668.698_x000D_ (516.836–870.134)	0.963_x000D_ (0.842–1.111)	1059.44	1051.86	-1064.32	0.0319743	0	0	0.996829	1.76885	6.1343	0.183872	0.637661	4.44905	579.182	1.32929	1.238 / 1.359 / 1.455	0.992503	37.5068	no	nbinomial
model_100m_clx_IBP_num_sqrt_temp_sqrt_PC7	1.766_x000D_ (1.286–2.236)	0.197_x000D_ (-0.014–0.407)	-	0.378_x000D_ (0.164–0.593)	-	-	-0.144_x000D_ (-0.312–0.024)	-	642.974_x000D_ (504.049–822.13)	0.992_x000D_ (0.869–1.127)	1072.41	1044.62	-1508.91	0.0104109	0	0	0.997717	1.59045	5.17035	0.165328	0.537459	3.96751	494.193	1.47518	1.369 / 1.498 / 1.614	0.999324	40.1068	no	nbinomial
model_100m_clx_IBP_num_sqrt_temp_sqrt_PC10	1.492_x000D_ (1.006–1.965)	0.066_x000D_ (-0.15–0.279)	-	0.436_x000D_ (0.241–0.631)	-	-	-	-0.437_x000D_ (-0.631–-0.244)	455.793_x000D_ (204.825–834.841)	0.974_x000D_ (0.832–1.144)	1036.94	1025.57	-3573.17	3.4142e-09	43.2207	0.216103	0.999383	1.21137	2.94735	0.125922	0.306377	1.91078	293.708	1.24472	1.156 / 1.254 / 1.355	0.990587	42.424	no	nbinomial
model_100m_clx_IBP_num_sqrt_PC2_sqrt_PC5	1.777_x000D_ (1.28–2.266)	0.213_x000D_ (-0.001–0.426)	-	-	0.273_x000D_ (0.108–0.438)	-0.124_x000D_ (-0.304–0.056)	-	-	952.217_x000D_ (803.173–1129.333)	1.027_x000D_ (0.915–1.152)	1056.66	1047.43	-1079.95	0.0283786	0	0	0.996718	1.68972	5.44368	0.175647	0.565871	1.59736	500.691	1.29863	1.096 / 1.299 / 1.499	0.970126	31.6875	no	nbinomial
model_100m_clx_IBP_num_sqrt_PC2_sqrt_PC7	1.831_x000D_ (1.332–2.322)	0.23_x000D_ (0.018–0.442)	-	-	0.302_x000D_ (0.104–0.5)	-	0.025_x000D_ (-0.176–0.224)	-	1088.788_x000D_ (899.88–1261.194)	1.068_x000D_ (0.936–1.183)	1065.53	1057.15	-849.109	0.042745	0	0	0.994338	1.91456	6.45302	0.199019	0.670792	2.41264	1537.17	1.70995	1.421 / 1.681 / 1.969	0.999944	34.5627	no	nbinomial
model_100m_clx_IBP_num_sqrt_PC2_sqrt_PC10	1.669_x000D_ (1.175–2.154)	0.153_x000D_ (-0.062–0.366)	-	-	0.216_x000D_ (0.049–0.384)	-	-	-0.306_x000D_ (-0.506–-0.108)	905.737_x000D_ (727.08–1111.251)	0.984_x000D_ (0.859–1.117)	1060.19	1051.2	-908.287	0.0381279	0	0	0.995927	1.86161	6.08535	0.193515	0.632573	0.64527	233.353	1.28721	1.118 / 1.285 / 1.457	0.987543	37.7815	no	nbinomial
model_100m_clx_IBP_num_sqrt_PC5_sqrt_PC7	1.782_x000D_ (1.263–2.291)	0.214_x000D_ (-0.013–0.439)	-	-	-	-0.16_x000D_ (-0.348–0.026)	-0.163_x000D_ (-0.337–0.009)	-	792.852_x000D_ (620.056–994.511)	1.026_x000D_ (0.89–1.166)	1057.63	1046.9	-1335.83	0.0235649	0	0	0.997681	1.56161	5.19665	0.162329	0.540193	0.291189	68.1299	1.32945	1.19 / 1.344 / 1.49	0.989854	37.738	no	nbinomial
model_100m_clx_IBP_num_sqrt_PC5_sqrt_PC10	1.65_x000D_ (1.142–2.15)	0.135_x000D_ (-0.085–0.355)	-	-	-	-0.089_x000D_ (-0.271–0.094)	-	-0.35_x000D_ (-0.548–-0.152)	818.452_x000D_ (667.885–967.149)	0.99_x000D_ (0.879–1.122)	1062.76	1053.17	-890.945	0.0396791	0	0	0.996135	1.86133	6.43518	0.193486	0.668937	0.18601	52.0546	1.14409	1.031 / 1.163 / 1.276	0.962009	35.6665	no	nbinomial
model_100m_clx_IBP_num_sqrt_PC7_sqrt_PC10	1.7_x000D_ (1.202–2.187)	0.166_x000D_ (-0.052–0.382)	-	-	-	-	-0.074_x000D_ (-0.247–0.098)	-0.348_x000D_ (-0.551–-0.146)	772.458_x000D_ (599.531–998.021)	1.007_x000D_ (0.878–1.149)	1076.69	1049.21	-1277.98	0.0218419	0	0	0.997176	1.74118	5.7832	0.180995	0.601165	0.177527	50.7222	1.18772	1.086 / 1.205 / 1.318	0.979539	34.1784	no	nbinomial
model_100m_clx_IBP_num_sqrt_precip_sqrt_temp_sqrt_PC2	1.753_x000D_ (1.27–2.228)	0.185_x000D_ (-0.028–0.397)	0.035_x000D_ (-0.362–0.427)	0.41_x000D_ (0.041–0.777)	0.271_x000D_ (0.107–0.435)	-	-	-	834.726_x000D_ (695.54–1009.053)	0.967_x000D_ (0.852–1.096)	1058.5	1049.28	-901.917	0.0380022	0	0	0.996098	1.80155	5.85077	0.187272	0.608188	5.94348e+47	1.92417e+54	2165.97	2109.104 / 2180.887 / 2210.988	1	36.9119	no	nbinomial
model_100m_clx_IBP_num_sqrt_precip_sqrt_temp_sqrt_PC5	1.716_x000D_ (1.202–2.221)	0.171_x000D_ (-0.059–0.4)	0.102_x000D_ (-0.271–0.473)	0.487_x000D_ (0.136–0.838)	-	-0.18_x000D_ (-0.364–0.004)	-	-	668.381_x000D_ (509.218–844.659)	0.988_x000D_ (0.863–1.13)	1065.52	1044.83	-1305.52	0.0228645	0	0	0.997742	1.59104	5.24564	0.165389	0.545285	1.07241e+48	2.26896e+54	1861.87	1812.638 / 1874.113 / 1901.214	1	39.6709	no	nbinomial
model_100m_clx_IBP_num_sqrt_precip_sqrt_temp_sqrt_PC7	1.819_x000D_ (1.324–2.305)	0.222_x000D_ (0.002–0.441)	0.129_x000D_ (-0.242–0.498)	0.474_x000D_ (0.124–0.825)	-	-	-0.142_x000D_ (-0.312–0.027)	-	630.637_x000D_ (507.384–797.354)	0.987_x000D_ (0.858–1.109)	1073.49	1049.01	-1107.79	0.0287191	0	0	0.99739	1.66625	5.53204	0.173207	0.575056	1.45926e+49	3.71572e+55	1982.88	1929.964 / 1995.908 / 2025.118	1	40.1054	no	nbinomial
model_100m_clx_IBP_num_sqrt_precip_sqrt_temp_sqrt_PC10	1.52_x000D_ (1.026–2.006)	0.073_x000D_ (-0.15–0.294)	0.067_x000D_ (-0.268–0.402)	0.484_x000D_ (0.164–0.804)	-	-	-	-0.426_x000D_ (-0.618–-0.235)	463.652_x000D_ (312.95–599.77)	0.947_x000D_ (0.826–1.087)	1055.77	1034.65	-1358.21	0.0178822	0	0	0.998624	1.52597	4.5217	0.158624	0.470031	7.69098e+40	4.7506e+46	1689.65	1644.691 / 1700.158 / 1725.972	1	30.2688	no	nbinomial
model_100m_clx_IBP_num_sqrt_precip_sqrt_PC2_sqrt_PC5	1.551_x000D_ (1.038–2.057)	0.093_x000D_ (-0.132–0.317)	-0.361_x000D_ (-0.622–-0.103)	-	0.288_x000D_ (0.125–0.451)	-0.155_x000D_ (-0.334–0.023)	-	-	957.013_x000D_ (816.322–1128.52)	1.079_x000D_ (0.968–1.216)	1064.09	1049.86	-884.383	0.0379403	0	0	0.995432	1.83367	6.16153	0.19061	0.640492	4.52223e+08	2.80706e+11	1584.32	1544.701 / 1595.115 / 1615.608	1	43.1666	no	nbinomial
model_100m_clx_IBP_num_sqrt_precip_sqrt_PC2_sqrt_PC7	1.699_x000D_ (1.198–2.195)	0.158_x000D_ (-0.06–0.377)	-0.337_x000D_ (-0.605–-0.074)	-	0.315_x000D_ (0.119–0.51)	-	0.028_x000D_ (-0.169–0.225)	-	979.176_x000D_ (799.466–1163.205)	1.005_x000D_ (0.892–1.131)	1067.45	1056.72	-821.094	0.0455508	0	0	0.994088	1.97355	6.68505	0.205151	0.694912	6.94193e+10	5.33593e+13	1507.97	1469.776 / 1518.517 / 1538.558	1	50.7385	no	nbinomial
model_100m_clx_IBP_num_sqrt_precip_sqrt_PC2_sqrt_PC10	1.419_x000D_ (0.912–1.921)	0.024_x000D_ (-0.2–0.249)	-0.369_x000D_ (-0.614–-0.127)	-	0.225_x000D_ (0.06–0.389)	-	-	-0.343_x000D_ (-0.54–-0.147)	860.153_x000D_ (703.331–1038.099)	0.95_x000D_ (0.839–1.071)	1058.03	1047.91	-814.283	0.043301	0	0	0.995611	1.88068	6.18523	0.195497	0.642956	999822	3.68062e+08	1449.55	1412.349 / 1459.735 / 1479.229	1	39.8804	no	nbinomial
model_100m_clx_IBP_num_sqrt_precip_sqrt_PC5_sqrt_PC7	1.523_x000D_ (0.987–2.054)	0.082_x000D_ (-0.155–0.319)	-0.327_x000D_ (-0.58–-0.075)	-	-	-0.199_x000D_ (-0.384–-0.014)	-0.171_x000D_ (-0.341–-0.002)	-	840.439_x000D_ (695.69–990.248)	1.004_x000D_ (0.892–1.126)	1061.89	1051.98	-935.536	0.037137	0	0	0.995637	1.79052	6.4733	0.186125	0.6729	7.72124e+08	2.62743e+11	1460.45	1423.573 / 1470.205 / 1489.647	1	30.7941	no	nbinomial
model_100m_clx_IBP_num_sqrt_precip_sqrt_PC5_sqrt_PC10	1.369_x000D_ (0.837–1.891)	0.004_x000D_ (-0.235–0.242)	-0.362_x000D_ (-0.588–-0.138)	-	-	-0.121_x000D_ (-0.303–0.06)	-	-0.399_x000D_ (-0.596–-0.204)	604.754_x000D_ (440.339–830.373)	0.963_x000D_ (0.837–1.115)	1056.27	1035.92	-1551.62	0.00855855	0	0	0.998431	1.49245	4.60319	0.15514	0.478502	5420.01	1.71922e+06	1140.59	1112.071 / 1147.579 / 1164.743	1	36.7781	no	nbinomial
model_100m_clx_IBP_num_sqrt_precip_sqrt_PC7_sqrt_PC10	1.446_x000D_ (0.933–1.952)	0.043_x000D_ (-0.187–0.272)	-0.334_x000D_ (-0.559–-0.111)	-	-	-	-0.064_x000D_ (-0.234–0.106)	-0.396_x000D_ (-0.599–-0.195)	618.572_x000D_ (483.526–772.979)	0.96_x000D_ (0.841–1.09)	1053.54	1032.09	-1751.06	0.000658616	0	0	0.998779	1.38703	4.04259	0.144182	0.420228	64307.5	2.21146e+07	1247.01	1213.438 / 1255.54 / 1273.914	1	38.2611	no	nbinomial
model_100m_clx_IBP_num_sqrt_temp_sqrt_PC2_sqrt_PC5	1.576_x000D_ (1.079–2.069)	0.103_x000D_ (-0.113–0.319)	-	0.414_x000D_ (0.183–0.648)	0.265_x000D_ (0.102–0.429)	-0.163_x000D_ (-0.343–0.017)	-	-	860.96_x000D_ (810.941–909.837)	0.978_x000D_ (0.918–1.032)	1057.26	1046.64	-814.171	0.0397767	0	0	0.996059	1.76399	5.83383	0.183367	0.606427	10.7581	2100.74	1.59073	1.409 / 1.592 / 1.773	0.999493	208.636	no	nbinomial
model_100m_clx_IBP_num_sqrt_temp_sqrt_PC2_sqrt_PC7	1.749_x000D_ (1.233–2.247)	0.192_x000D_ (-0.033–0.413)	-	0.386_x000D_ (0.16–0.618)	0.279_x000D_ (0.077–0.48)	-	0.013_x000D_ (-0.188–0.214)	-	806.034_x000D_ (437.013–1314.012)	0.991_x000D_ (0.832–1.165)	1056.54	1043.88	-2355.68	1.58728e-05	0	0	0.997848	1.55122	4.53465	0.161249	0.471377	23.6886	4636.14	2.18394	1.862 / 2.161 / 2.462	1	39.0144	no	nbinomial
model_100m_clx_IBP_num_sqrt_temp_sqrt_PC2_sqrt_PC10	1.49_x000D_ (1.006–1.966)	0.058_x000D_ (-0.158–0.272)	-	0.425_x000D_ (0.221–0.63)	0.179_x000D_ (0.014–0.345)	-	-	-0.372_x000D_ (-0.57–-0.176)	637.017_x000D_ (504.863–829.978)	0.905_x000D_ (0.776–1.023)	1050.78	1041.44	-967.783	0.034472	0	0	0.997647	1.69792	5.2032	0.176499	0.540873	4.22554	744.368	1.47116	1.314 / 1.463 / 1.619	0.999831	33.0964	no	nbinomial
model_100m_clx_IBP_num_sqrt_temp_sqrt_PC5_sqrt_PC7	1.545_x000D_ (1.029–2.054)	0.091_x000D_ (-0.137–0.319)	-	0.416_x000D_ (0.197–0.637)	-	-0.207_x000D_ (-0.391–-0.024)	-0.168_x000D_ (-0.336–0)	-	707.155_x000D_ (559.944–908.275)	0.96_x000D_ (0.838–1.085)	1049.64	1044.2	-1422.72	0.0146446	0	0	0.997424	1.60384	5.38988	0.166719	0.560279	1.91017	277.881	1.53318	1.414 / 1.55 / 1.678	1	37.492	no	nbinomial
model_100m_clx_IBP_num_sqrt_temp_sqrt_PC5_sqrt_PC10	1.386_x000D_ (0.873–1.884)	0.015_x000D_ (-0.212–0.24)	-	0.458_x000D_ (0.258–0.658)	-	-0.128_x000D_ (-0.309–0.053)	-	-0.416_x000D_ (-0.614–-0.221)	470.471_x000D_ (215.928–858.43)	0.967_x000D_ (0.829–1.128)	1035.9	1024.2	-3562.24	3.85876e-09	44.0817	0.220409	0.999436	1.16213	2.73863	0.120804	0.284681	1.57288	236.268	1.27895	1.183 / 1.287 / 1.395	0.993856	37.9361	no	nbinomial
model_100m_clx_IBP_num_sqrt_temp_sqrt_PC7_sqrt_PC10	1.468_x000D_ (0.973–1.949)	0.057_x000D_ (-0.162–0.274)	-	0.433_x000D_ (0.236–0.631)	-	-	-0.047_x000D_ (-0.217–0.122)	-0.422_x000D_ (-0.625–-0.222)	469.808_x000D_ (212.136–866.171)	0.974_x000D_ (0.835–1.138)	1037.27	1024.14	-3587.92	3.44609e-09	42.8955	0.214478	0.999432	1.16684	2.74405	0.121293	0.285244	1.6876	260.585	1.36658	1.253 / 1.374 / 1.492	0.998873	54.1921	no	nbinomial
model_100m_clx_IBP_num_sqrt_PC2_sqrt_PC5_sqrt_PC7	1.811_x000D_ (1.272–2.396)	0.21_x000D_ (-0.011–0.43)	-	-	0.28_x000D_ (0.072–0.502)	-0.122_x000D_ (-0.307–0.064)	0.003_x000D_ (-0.207–0.222)	-	969.121_x000D_ (802.961–1175.122)	1.018_x000D_ (0.898–1.149)	1067.11	1058.66	-851.42	0.0385678	0	0	0.995371	1.88277	6.29108	0.195714	0.653958	1.94901	207218	2.37189	1.89 / 2.293 / 2.752	1	35.4129	no	nbinomial
model_100m_clx_IBP_num_sqrt_PC2_sqrt_PC5_sqrt_PC10	1.598_x000D_ (1.087–2.1)	0.116_x000D_ (-0.106–0.336)	-	-	0.216_x000D_ (0.05–0.383)	-0.085_x000D_ (-0.264–0.093)	-	-0.291_x000D_ (-0.491–-0.091)	957.161_x000D_ (762.079–1169.833)	0.993_x000D_ (0.871–1.14)	1064.72	1055.9	-804.235	0.0453897	0	0	0.994789	1.98669	6.69196	0.206517	0.69563	0.544364	187.829	1.32683	1.144 / 1.319 / 1.512	0.993687	42.0334	no	nbinomial
model_100m_clx_IBP_num_sqrt_PC2_sqrt_PC7_sqrt_PC10	1.694_x000D_ (1.192–2.186)	0.16_x000D_ (-0.059–0.378)	-	-	0.246_x000D_ (0.049–0.443)	-	0.057_x000D_ (-0.142–0.256)	-0.312_x000D_ (-0.513–-0.111)	917.309_x000D_ (701.367–1171.661)	0.99_x000D_ (0.86–1.137)	1063.04	1053.42	-912.531	0.0381432	0	0	0.995768	1.8862	6.14779	0.19607	0.639063	1.08301	482.059	1.69684	1.446 / 1.688 / 1.925	0.999944	39.0142	no	nbinomial
model_100m_clx_IBP_num_sqrt_PC5_sqrt_PC7_sqrt_PC10	1.606_x000D_ (1.091–2.113)	0.124_x000D_ (-0.102–0.348)	-	-	-	-0.103_x000D_ (-0.29–0.083)	-0.091_x000D_ (-0.266–0.085)	-0.328_x000D_ (-0.534–-0.122)	800.643_x000D_ (676.866–947.219)	0.991_x000D_ (0.876–1.106)	1062.09	1051.08	-874.257	0.0407197	0	0	0.996592	1.79622	6.1641	0.186718	0.640759	0.134107	37.6621	1.28517	1.152 / 1.291 / 1.43	0.992954	37.3212	no	nbinomial
model_100m_clx_IBP_num_sqrt_precip_sqrt_temp_sqrt_PC2_sqrt_PC5	1.571_x000D_ (1.057–2.077)	0.105_x000D_ (-0.122–0.33)	0.007_x000D_ (-0.398–0.408)	0.425_x000D_ (0.051–0.799)	0.268_x000D_ (0.104–0.432)	-0.164_x000D_ (-0.344–0.015)	-	-	870.151_x000D_ (714.601–1037.14)	0.971_x000D_ (0.856–1.087)	1060.03	1049.7	-825.781	0.0397911	0	0	0.995523	1.83799	6.15658	0.191059	0.639977	1.29564e+47	6.15164e+53	2252.76	2194.056 / 2268.346 / 2299.094	1	41.939	no	nbinomial
model_100m_clx_IBP_num_sqrt_precip_sqrt_temp_sqrt_PC2_sqrt_PC7	1.736_x000D_ (1.232–2.229)	0.198_x000D_ (-0.022–0.416)	0.045_x000D_ (-0.351–0.435)	0.418_x000D_ (0.052–0.785)	0.274_x000D_ (0.073–0.476)	-	0.008_x000D_ (-0.194–0.209)	-	782.135_x000D_ (636.357–973.356)	1.007_x000D_ (0.89–1.134)	1023.54	1020.99	-2611.22	2.41185e-06	0	0	0.999342	1.07193	2.26939	0.111427	0.235903	1.13627e+48	4.45638e+54	2138.59	2082.872 / 2153.948 / 2182.93	1	33.4293	no	nbinomial
model_100m_clx_IBP_num_sqrt_precip_sqrt_temp_sqrt_PC2_sqrt_PC10	1.488_x000D_ (0.992–1.975)	0.059_x000D_ (-0.163–0.281)	0.024_x000D_ (-0.329–0.373)	0.442_x000D_ (0.11–0.774)	0.181_x000D_ (0.017–0.345)	-	-	-0.368_x000D_ (-0.563–-0.173)	578.62_x000D_ (435.535–749.516)	0.928_x000D_ (0.814–1.07)	1057.39	1035.78	-1290.6	0.0213888	0	0	0.99808	1.59133	4.66485	0.165419	0.484911	1.17447e+41	1.02794e+47	1789.59	1742.9 / 1801.762 / 1826.988	1	43.3787	no	nbinomial
model_100m_clx_IBP_num_sqrt_precip_sqrt_temp_sqrt_PC5_sqrt_PC7	1.591_x000D_ (1.057–2.114)	0.116_x000D_ (-0.122–0.352)	0.095_x000D_ (-0.277–0.464)	0.487_x000D_ (0.138–0.837)	-	-0.204_x000D_ (-0.389–-0.019)	-0.166_x000D_ (-0.335–0.002)	-	656.853_x000D_ (511.287–872.958)	0.98_x000D_ (0.854–1.116)	1065.45	1044.36	-1180.8	0.0268562	0	0	0.997607	1.59977	5.33275	0.166296	0.554339	1.57787e+47	2.9412e+53	1852.72	1804.172 / 1865.864 / 1891.313	1	34.4421	no	nbinomial
model_100m_clx_IBP_num_sqrt_precip_sqrt_temp_sqrt_PC5_sqrt_PC10	1.404_x000D_ (0.887–1.915)	0.015_x000D_ (-0.219–0.248)	0.047_x000D_ (-0.293–0.387)	0.489_x000D_ (0.164–0.813)	-	-0.128_x000D_ (-0.308–0.051)	-	-0.403_x000D_ (-0.597–-0.21)	610.528_x000D_ (448.837–764.818)	0.952_x000D_ (0.833–1.095)	1071.67	1037.02	-1969.51	7.2037e-05	0	0	0.998418	1.55754	4.70726	0.161906	0.48932	3.53434e+40	1.85197e+46	1733.02	1687.442 / 1743.74 / 1769.921	1	33.9962	no	nbinomial
model_100m_clx_IBP_num_sqrt_precip_sqrt_temp_sqrt_PC7_sqrt_PC10	1.498_x000D_ (0.989–1.998)	0.069_x000D_ (-0.161–0.297)	0.069_x000D_ (-0.271–0.407)	0.483_x000D_ (0.158–0.806)	-	-	-0.048_x000D_ (-0.218–0.121)	-0.415_x000D_ (-0.619–-0.212)	479.448_x000D_ (220.756–867.896)	0.975_x000D_ (0.839–1.135)	1037.09	1026.14	-3596.11	2.90415e-09	43.8697	0.219348	0.999403	1.17957	2.80477	0.122617	0.291556	6.23377e+41	5.02937e+47	1495.45	1457.06 / 1505.4 / 1525.506	1	45.6246	no	nbinomial
model_100m_clx_IBP_num_sqrt_precip_sqrt_PC2_sqrt_PC5_sqrt_PC7	1.545_x000D_ (1.009–2.074)	0.081_x000D_ (-0.152–0.314)	-0.367_x000D_ (-0.641–-0.099)	-	0.289_x000D_ (0.092–0.487)	-0.152_x000D_ (-0.334–0.03)	-0.002_x000D_ (-0.202–0.197)	-	1020.928_x000D_ (836.519–1236.655)	0.991_x000D_ (0.868–1.124)	1071.27	1062.63	-738.681	0.055219	0	0	0.99226	2.12251	7.50102	0.220635	0.779732	6.01684e+09	4.34957e+12	1576.14	1536.736 / 1587.545 / 1608.232	1	48.2674	no	nbinomial
model_100m_clx_IBP_num_sqrt_precip_sqrt_PC2_sqrt_PC5_sqrt_PC10	1.319_x000D_ (0.792–1.841)	-0.022_x000D_ (-0.256–0.212)	-0.39_x000D_ (-0.639–-0.146)	-	0.222_x000D_ (0.058–0.386)	-0.119_x000D_ (-0.297–0.059)	-	-0.327_x000D_ (-0.525–-0.129)	869.128_x000D_ (707.699–1049.706)	0.951_x000D_ (0.836–1.076)	1056.14	1047.07	-853.075	0.0404348	0	0	0.99573	1.85038	6.12547	0.192348	0.636744	135182	5.02016e+07	1449.16	1412.887 / 1459.158 / 1478.486	1	34.345	no	nbinomial
model_100m_clx_IBP_num_sqrt_precip_sqrt_PC2_sqrt_PC7_sqrt_PC10	1.437_x000D_ (0.919–1.946)	0.031_x000D_ (-0.197–0.258)	-0.377_x000D_ (-0.63–-0.13)	-	0.265_x000D_ (0.071–0.46)	-	0.073_x000D_ (-0.123–0.268)	-0.351_x000D_ (-0.55–-0.152)	889.375_x000D_ (679.286–1108.297)	0.96_x000D_ (0.803–1.126)	1058.43	1049.28	-902.053	0.0390904	0	0	0.995481	1.89433	6.17552	0.196916	0.641946	3.49839e+06	1.344e+09	1236.67	1206.859 / 1244.767 / 1263.209	1	42.3529	no	nbinomial
model_100m_clx_IBP_num_sqrt_precip_sqrt_PC5_sqrt_PC7_sqrt_PC10	1.323_x000D_ (0.779–1.858)	-0.022_x000D_ (-0.264–0.22)	-0.359_x000D_ (-0.593–-0.126)	-	-	-0.137_x000D_ (-0.322–0.047)	-0.087_x000D_ (-0.259–0.085)	-0.362_x000D_ (-0.569–-0.156)	606.925_x000D_ (430.987–762.674)	0.952_x000D_ (0.821–1.084)	1054.66	1035.12	-1666.2	0.00480375	0	0	0.998422	1.44523	4.39899	0.150232	0.457276	59309.3	1.91487e+07	1133.25	1104.866 / 1140.198 / 1156.868	1	47.7027	no	nbinomial
model_100m_clx_IBP_num_sqrt_temp_sqrt_PC2_sqrt_PC5_sqrt_PC7	1.58_x000D_ (1.048–2.1)	0.103_x000D_ (-0.128–0.333)	-	0.419_x000D_ (0.189–0.654)	0.255_x000D_ (0.054–0.455)	-0.167_x000D_ (-0.351–0.017)	-0.019_x000D_ (-0.222–0.182)	-	859.464_x000D_ (605.268–1204.335)	0.986_x000D_ (0.832–1.144)	1087.36	1060.35	-883.201	0.0384811	0	0	0.994058	2.03501	7.0024	0.211539	0.7279	13.2444	2663.76	2.2385	1.93 / 2.22 / 2.52	1	32.5349	no	nbinomial
model_100m_clx_IBP_num_sqrt_temp_sqrt_PC2_sqrt_PC5_sqrt_PC10	1.379_x000D_ (0.875–1.875)	0.003_x000D_ (-0.221–0.225)	-	0.444_x000D_ (0.234–0.654)	0.182_x000D_ (0.019–0.345)	-0.126_x000D_ (-0.303–0.051)	-	-0.345_x000D_ (-0.542–-0.148)	673.137_x000D_ (509.729–846.528)	0.914_x000D_ (0.793–1.051)	1049.88	1041.22	-1099.86	0.0275	0	0	0.997359	1.70957	5.31599	0.17771	0.552598	3.52193	869.432	1.50425	1.345 / 1.5 / 1.661	0.999887	37.3362	no	nbinomial
model_100m_clx_IBP_num_sqrt_temp_sqrt_PC2_sqrt_PC7_sqrt_PC10	1.505_x000D_ (1.013–1.984)	0.079_x000D_ (-0.139–0.295)	-	0.426_x000D_ (0.227–0.626)	0.206_x000D_ (0.009–0.405)	-	0.064_x000D_ (-0.136–0.264)	-0.389_x000D_ (-0.59–-0.189)	531.683_x000D_ (346.303–764.73)	0.952_x000D_ (0.819–1.089)	1015.99	1011.22	-2838.18	7.8431e-08	0	0	0.999543	0.999069	1.84251	0.103853	0.191529	6.80459	1550.89	1.94882	1.704 / 1.951 / 2.175	1	47.42	no	nbinomial
model_100m_clx_IBP_num_sqrt_temp_sqrt_PC5_sqrt_PC7_sqrt_PC10	1.36_x000D_ (0.854–1.858)	-0.004_x000D_ (-0.231–0.221)	-	0.455_x000D_ (0.257–0.654)	-	-0.142_x000D_ (-0.324–0.039)	-0.071_x000D_ (-0.239–0.097)	-0.39_x000D_ (-0.59–-0.191)	457.324_x000D_ (340.918–615.869)	0.957_x000D_ (0.835–1.098)	1058.26	1037.41	-1173.96	0.0233532	0	0	0.998342	1.58885	4.90747	0.165161	0.510132	1.27987	171.006	1.35206	1.24 / 1.358 / 1.47	0.999831	37.534	no	nbinomial
model_100m_clx_IBP_num_sqrt_PC2_sqrt_PC5_sqrt_PC7_sqrt_PC10	1.657_x000D_ (1.138–2.169)	0.142_x000D_ (-0.085–0.368)	-	-	0.23_x000D_ (0.029–0.431)	-0.074_x000D_ (-0.261–0.111)	0.038_x000D_ (-0.168–0.244)	-0.298_x000D_ (-0.504–-0.093)	877.62_x000D_ (736.816–1079.946)	0.981_x000D_ (0.864–1.096)	1065.17	1054.29	-815.094	0.043148	0	0	0.995978	1.87259	6.15944	0.194656	0.640274	0.872498	343.701	1.8814	1.607 / 1.876 / 2.141	1	36.5072	no	nbinomial
model_100m_clx_IBP_num_sqrt_precip_sqrt_temp_sqrt_PC2_sqrt_PC5_sqrt_PC7	1.561_x000D_ (1.024–2.089)	0.1_x000D_ (-0.135–0.335)	0.01_x000D_ (-0.398–0.408)	0.427_x000D_ (0.054–0.799)	0.255_x000D_ (0.054–0.455)	-0.168_x000D_ (-0.35–0.014)	-0.021_x000D_ (-0.222–0.179)	-	852.742_x000D_ (611.564–1099.282)	0.975_x000D_ (0.848–1.137)	1056.97	1049.29	-1088.98	0.0285096	0	0	0.995913	1.80106	5.96339	0.18722	0.619894	1.66697e+47	6.87403e+53	2036.99	1985.181 / 2052.761 / 2078.716	1	33.6092	no	nbinomial
model_100m_clx_IBP_num_sqrt_precip_sqrt_temp_sqrt_PC2_sqrt_PC5_sqrt_PC10	1.375_x000D_ (0.851–1.892)	0.007_x000D_ (-0.226–0.239)	0.007_x000D_ (-0.348–0.36)	0.448_x000D_ (0.113–0.784)	0.179_x000D_ (0.016–0.344)	-0.126_x000D_ (-0.305–0.052)	-	-0.345_x000D_ (-0.543–-0.149)	650.552_x000D_ (520.037–793.618)	0.932_x000D_ (0.823–1.059)	1037.31	1028.62	-1547.53	0.00946112	0	0	0.998651	1.40643	3.86976	0.146198	0.402262	3.96568e+40	3.28823e+46	1870.68	1821.762 / 1882.516 / 1910.455	1	37.739	no	nbinomial
model_100m_clx_IBP_num_sqrt_precip_sqrt_temp_sqrt_PC2_sqrt_PC7_sqrt_PC10	1.494_x000D_ (0.98–1.995)	0.068_x000D_ (-0.16–0.295)	0.015_x000D_ (-0.346–0.369)	0.439_x000D_ (0.101–0.775)	0.216_x000D_ (0.017–0.415)	-	0.062_x000D_ (-0.136–0.26)	-0.377_x000D_ (-0.578–-0.178)	618.924_x000D_ (380.015–875.504)	0.983_x000D_ (0.849–1.145)	1052.58	1028.09	-2173.27	2.61533e-05	0	0	0.998806	1.38198	3.62463	0.143657	0.376781	2.55172e+41	2.58469e+47	1774.96	1730.608 / 1787.14 / 1811.465	1	38.8004	no	nbinomial
model_100m_clx_IBP_num_sqrt_precip_sqrt_temp_sqrt_PC5_sqrt_PC7_sqrt_PC10	1.345_x000D_ (0.814–1.868)	-0.008_x000D_ (-0.247–0.23)	0.046_x000D_ (-0.303–0.395)	0.489_x000D_ (0.158–0.82)	-	-0.145_x000D_ (-0.328–0.039)	-0.078_x000D_ (-0.248–0.092)	-0.379_x000D_ (-0.58–-0.178)	570.778_x000D_ (438.683–698.963)	0.943_x000D_ (0.823–1.063)	1062.65	1038.64	-1122.74	0.0254469	0	0	0.997934	1.61607	5.11305	0.16799	0.531502	3.91627e+41	3.00767e+47	1803.65	1756.112 / 1814.456 / 1842.298	1	41.495	no	nbinomial
model_100m_clx_IBP_num_sqrt_precip_sqrt_PC2_sqrt_PC5_sqrt_PC7_sqrt_PC10	1.348_x000D_ (0.811–1.881)	-0.01_x000D_ (-0.248–0.228)	-0.39_x000D_ (-0.637–-0.145)	-	0.246_x000D_ (0.049–0.442)	-0.109_x000D_ (-0.292–0.073)	0.047_x000D_ (-0.154–0.247)	-0.333_x000D_ (-0.534–-0.132)	860.19_x000D_ (712.074–1029.331)	0.952_x000D_ (0.84–1.08)	1057.9	1047.89	-857.868	0.0403506	0	0	0.995872	1.84175	6.03679	0.19145	0.627524	181872	6.7874e+07	1424.04	1388.411 / 1433.686 / 1452.449	1	50.2902	no	nbinomial
model_100m_clx_IBP_num_sqrt_temp_sqrt_PC2_sqrt_PC5_sqrt_PC7_sqrt_PC10	1.397_x000D_ (0.879–1.906)	0.018_x000D_ (-0.213–0.247)	-	0.447_x000D_ (0.242–0.654)	0.196_x000D_ (-0.002–0.394)	-0.12_x000D_ (-0.302–0.062)	0.035_x000D_ (-0.167–0.237)	-0.36_x000D_ (-0.561–-0.16)	549.077_x000D_ (377.671–767.954)	0.94_x000D_ (0.811–1.086)	1057.36	1035.31	-1397.44	0.0166947	0	0	0.998215	1.56057	4.54995	0.162222	0.472968	5.19338	1198.84	2.0072	1.762 / 2.009 / 2.242	1	44.0369	no	nbinomial
model_100m_clx_IBP_num_sqrt_precip_sqrt_temp_sqrt_PC2_sqrt_PC5_sqrt_PC7_sqrt_PC10	1.343_x000D_ (0.79–1.893)	0.005_x000D_ (-0.237–0.247)	-0.005_x000D_ (-0.38–0.361)	0.446_x000D_ (0.097–0.793)	0.205_x000D_ (0.005–0.406)	-0.123_x000D_ (-0.306–0.059)	0.031_x000D_ (-0.172–0.233)	-0.349_x000D_ (-0.553–-0.147)	669.79_x000D_ (122.602–1906.737)	0.938_x000D_ (0.728–1.17)	1022.79	1021.72	-3150.52	8.42666e-09	3.07758	0.0153879	0.999247	1.16663	2.59712	0.121271	0.269971	1.58686e+42	1.98519e+48	1640.93	1600.852 / 1652.349 / 1673.371	1	60.7918	no	nbinomial
