# Supplementary material
Source: Research Square preprint supplement (doi:10.21203/rs.3.rs-9762487/v1)
Supplement: Supplementary file 8 [file f3ac05eae96a854b30865454.xlsx]

## Sheet: Read Me
Read me
Each worksheet is labeled according to the buffer radius used. Within each worksheet, regression models are identified by the covariates included. Models are further characterized by the buffer radius used for spatial aggregation of covariates (20, 30, 50, and 100 m).
The prefix “PC_” indicates that the covariate represents the percentage of a given land-use and land-cover class within the buffer. The prefix “sqrt_PC” indicates square-root of the percentage of each variable. Land-use and land-cover classes were maintained as coded categories to facilitate data organization.
Variables:
IBP_num — IBP index
humidity — relative humidity (%)
precipitation — precipitation (mm)
temperature — temperature (°C)
sqrt_humid — square-root transformation of humidity
sqrt_precip — square-root transformation of precipitation
sqrt_temp — square-root transformation of temperature
Land-use and land-cover variables:
PC1 / sqrt_PC1 — Cement
PC2 / sqrt_PC2 — Tree
PC3 / sqrt_PC3 — Asbestos tile
PC4 / sqrt_PC4 — Swimming pool
PC5 / sqrt_PC5 — Exposed soil
PC6 / sqrt_PC6 — Grass
PC7 / sqrt_PC7 — Asphalt
PC8 / sqrt_PC8 — Zinc tile
PC9 / sqrt_PC9 — Shade
PC10 / sqrt_PC10 — Ceramic tile
Each worksheet contains regression model summaries with the following columns:
Model: Identifier of the fitted model, indicating the spatial buffer used, the response variable, and the set of covariates included.
Intercept: Posterior mean estimate of the intercept (expected value of the dependent variable when all covariates are equal to zero), along with the 95% credible interval.
Covariates (e.g., sqrt_, IBP_num, etc.): Posterior mean estimates of the coefficients for the independent variables, with their respective 95% credible intervals. These represent the direction (positive/negative) and magnitude of the association with the dependent variable.
Range: Posterior mean and 95% credible interval of the spatial range parameter (SPDE), indicating the approximate distance beyond which spatial autocorrelation becomes negligible.
Stdev: Posterior mean and 95% credible interval of the spatial standard deviation parameter (SPDE), representing the magnitude of residual spatial variability captured by the latent Gaussian field. Higher values indicate stronger spatial heterogeneity not explained by the covariates.
DIC (Deviance Information Criterion): Measure of model fit that accounts for model complexity. Lower values indicate a better balance between goodness of fit and parsimony.
WAIC (Watanabe–Akaike Information Criterion): Fully Bayesian criterion for model comparison, with emphasis on predictive performance. Lower values indicate better predictive accuracy.
LPML (Log Pseudo Marginal Likelihood): Measure of overall predictive performance based on CPO. Higher values indicate better predictive ability.
CPO (Conditional Predictive Ordinate, median): Summary of pointwise predictive performance based on leave-one-out cross-validation. Higher values indicate better predictive performance.
cpo_failures: Number of observations for which the CPO could not be reliably estimated (missing or unstable values), potentially indicating model fit issues or numerical instability.
cpo_failure_rate: Proportion of observations with CPO failures. Lower values indicate greater model stability and more reliable predictive inference.
correlation: Pearson correlation between observed and predicted values at the sampled locations. Values closer to 1 indicate better agreement between observed and predicted values.
MAE (Mean Absolute Error): Average absolute difference between observed and predicted values, representing the typical magnitude of prediction errors. Lower values indicate better predictive accuracy.
RMSE (Root Mean Squared Error): Square root of the average squared differences between observed and predicted values. It gives greater weight to large errors, making it sensitive to extreme deviations. Lower values indicate better model performance.
MAE_rel (Relative Mean Absolute Error): The MAE normalized by the mean of the observed values, representing the average prediction error relative to the magnitude of the response variable. It can be interpreted as the typical percentage error. Lower values indicate better predictive accuracy.
RMSE_rel (Relative Root Mean Squared Error): The RMSE normalized by the mean of the observed values, representing the typical prediction error with greater emphasis on large deviations, relative to the magnitude of the response variable. Lower values indicate better model performance.
min_pred: Minimum predicted value over the spatial prediction grid, indicating the lowest estimated intensity of the response variable.
max_pred: Maximum predicted value over the spatial prediction grid, indicating the highest estimated intensity of the response variable.
CV_mean (Coefficient of Variation, mean): Mean coefficient of variation across the prediction grid, representing the average relative uncertainty of the model predictions. Lower values indicate more stable predictions.
CV_q25_q50_q75 (Coefficient of Variation quartiles): First quartile (Q25), median (Q50), and third quartile (Q75) of the coefficient of variation across the prediction grid, summarizing the distribution of relative uncertainty.
CV_high_prop (Proportion of high uncertainty): Proportion of grid cells with coefficient of variation greater than 0.7, representing the spatial extent of high prediction uncertainty. Lower values indicate a more reliable prediction surface.
Time: Total model execution time (in seconds).
non_zero_CrI: Indicator of whether the 95% credible intervals for all coefficients (including the intercept) exclude zero.
"yes": none of the intervals include zero
"no": at least one interval includes zero
model_family: Probability distribution assumed for the response variable (e.g., Poisson or negative binomial).
DIC, WAIC, LPML and CPO-based metrics are computed using the observed data and evaluate overall model fit and predictive performance based on the sampled locations.
Correlation, MAE, RMSE, MAE_rel and RMSE_rel are calculated by comparing observed and predicted values at the sampled locations, providing measures of prediction accuracy.
The coefficient of variation (CV) was calculated as the ratio between the posterior standard deviation and posterior mean prediction for each grid cell.
Spatial prediction summaries (min_pred, max_pred, and CV metrics) were computed using predictions over the continuous spatial prediction grid generated from the fitted SPDE models, representing the range of predicted values and associated uncertainty at unsampled locations.

## Sheet: Table_S20_culex_20m
Model	Intercept	sqrt_humid	sqrt_precip	sqrt_temp	IBP_num	sqrt_PC1	sqrt_PC2	sqrt_PC3	sqrt_PC4	sqrt_PC5	sqrt_PC6	sqrt_PC7	sqrt_PC8	sqrt_PC9	sqrt_PC10	Range	Stdev	DIC	WAIC	LPML	CPO_median	cpo_failures	cpo_failure_rate	correlation	MAE	RMSE	MAE_rel	RMSE_rel	min_pred	max_pred	CV_mean	CV_q25_q50_q75	CV_high_prop	Time	non_zero_CrI	model_family
model_20m_clx_	1.381_x000D_ (1.127–1.632)	-	-	-	-	-	-	-	-	-	-	-	-	-	-	1053.455_x000D_ (919.671–1202.857)	1.087_x000D_ (0.976–1.22)	1068.3	1060.48	-881.554	0.0382785	0	0	0.992208	1.98601	7.59252	0.206446	0.789243	0.947513	186.244	1.11091	0.935 / 1.158 / 1.33	0.899667	33.2614	yes	nbinomial
model_20m_clx_sqrt_humid	1.38_x000D_ (1.12–1.639)	-0.092_x000D_ (-0.354–0.169)	-	-	-	-	-	-	-	-	-	-	-	-	-	1083.094_x000D_ (940.024–1237.643)	1.102_x000D_ (0.992–1.227)	1076.56	1062.84	-824.283	0.0451308	0	0	0.990711	2.05936	7.96419	0.214071	0.827878	0.939852	184.29	1.12573	0.931 / 1.163 / 1.36	0.897695	38.3818	no	nbinomial
model_20m_clx_sqrt_precip	1.373_x000D_ (1.14–1.6)	-	-0.398_x000D_ (-0.642–-0.155)	-	-	-	-	-	-	-	-	-	-	-	-	907.577_x000D_ (759.153–1071.249)	1.047_x000D_ (0.918–1.188)	1060.58	1051.11	-1130.02	0.0277618	0	0	0.9951	1.77847	6.49306	0.184872	0.674955	1.08642	196.404	1.08887	0.95 / 1.144 / 1.275	0.903895	34.0962	yes	nbinomial
model_20m_clx_sqrt_temp	1.375_x000D_ (1.153–1.595)	-	-	0.476_x000D_ (0.259–0.693)	-	-	-	-	-	-	-	-	-	-	-	790.699_x000D_ (592.605–1050.506)	1.014_x000D_ (0.878–1.159)	1058.12	1045.63	-1424.76	0.0172329	0	0	0.996592	1.66189	5.7574	0.172753	0.598482	1.07603	195.13	1.05251	0.947 / 1.104 / 1.208	0.902486	36.0242	yes	nbinomial
model_20m_clx_IBP_num	2.03_x000D_ (1.53–2.51)	-	-	-	0.329_x000D_ (0.112–0.542)	-	-	-	-	-	-	-	-	-	-	781.778_x000D_ (457.837–1207.03)	1.068_x000D_ (0.917–1.246)	1069.35	1048.37	-1762.99	0.00217635	0	0	0.99801	1.54536	4.94807	0.16064	0.514353	0.991053	213.337	1.08927	0.981 / 1.143 / 1.252	0.91111	36.3748	yes	nbinomial
model_20m_clx_sqrt_PC1	1.381_x000D_ (1.129–1.632)	-	-	-	-	0.155_x000D_ (-0.003–0.313)	-	-	-	-	-	-	-	-	-	1056.211_x000D_ (918.402–1207.291)	1.092_x000D_ (0.981–1.208)	1069.47	1060.09	-823.163	0.0443817	0	0	0.991267	2.03109	7.93005	0.211132	0.824329	0.929755	221.858	1.12288	0.948 / 1.17 / 1.342	0.904853	41.544	no	nbinomial
model_20m_clx_sqrt_PC2	1.379_x000D_ (1.134–1.622)	-	-	-	-	-	0.16_x000D_ (0.003–0.318)	-	-	-	-	-	-	-	-	1010.256_x000D_ (877.427–1167.097)	1.065_x000D_ (0.969–1.178)	1069.67	1060.87	-806.467	0.0450276	0	0	0.9924	1.98059	7.49787	0.205883	0.779404	0.898399	140.986	1.10074	0.935 / 1.149 / 1.305	0.902373	32.6434	yes	nbinomial
model_20m_clx_sqrt_PC3	1.385_x000D_ (1.13–1.639)	-	-	-	-	-	-	0.134_x000D_ (-0.034–0.302)	-	-	-	-	-	-	-	1032.56_x000D_ (868.686–1195.712)	1.083_x000D_ (0.968–1.198)	1069.13	1060.37	-858.688	0.0429598	0	0	0.993408	1.95197	7.37411	0.202907	0.76654	0.936698	193.584	1.12584	0.953 / 1.174 / 1.344	0.906939	40.7269	no	nbinomial
model_20m_clx_sqrt_PC4	1.384_x000D_ (1.135–1.63)	-	-	-	-	-	-	-	0.125_x000D_ (-0.022–0.271)	-	-	-	-	-	-	1122.201_x000D_ (975.453–1292.874)	1.055_x000D_ (0.955–1.198)	1069.06	1069.19	-743.978	0.0530888	0	0	0.988604	2.22005	8.73741	0.230774	0.908255	0.976406	254.527	1.07052	0.903 / 1.112 / 1.277	0.892847	38.5427	no	nbinomial
model_20m_clx_sqrt_PC5	1.389_x000D_ (1.134–1.645)	-	-	-	-	-	-	-	-	-0.079_x000D_ (-0.244–0.086)	-	-	-	-	-	1079.973_x000D_ (877.419–1365.141)	1.095_x000D_ (0.963–1.248)	1077.41	1067.6	-846.372	0.0453707	0	0	0.990855	2.125	8.22082	0.220894	0.854555	0.870271	178.462	1.11886	0.941 / 1.164 / 1.341	0.904515	40.3986	no	nbinomial
model_20m_clx_sqrt_PC6	1.417_x000D_ (0.79–2.045)	-	-	-	-	-	-	-	-	-	-0.175_x000D_ (-0.331–-0.02)	-	-	-	-	2916.934_x000D_ (2858.227–2953.105)	1.822_x000D_ (1.794–1.849)	1071.29	1077.21	-797.934	0.0442375	0	0	0.976855	2.53179	9.79089	0.26318	1.01776	0.536878	189.167	1.31094	0.805 / 1.101 / 1.588	0.83648	189.722	yes	nbinomial
model_20m_clx_sqrt_PC7	1.37_x000D_ (1.107–1.632)	-	-	-	-	-	-	-	-	-	-	-0.137_x000D_ (-0.302–0.027)	-	-	-	1115.073_x000D_ (967.218–1259.004)	1.124_x000D_ (1.005–1.242)	1068.66	1059.39	-885.308	0.0391539	0	0	0.990025	2.00621	7.89319	0.208546	0.820498	0.829619	190.643	1.15559	0.957 / 1.198 / 1.402	0.90553	38.9319	no	nbinomial
model_20m_clx_sqrt_PC8	1.494_x000D_ (1.168–1.819)	-	-	-	-	-	-	-	-	-	-	-	0.095_x000D_ (-0.036–0.226)	-	-	2053.461_x000D_ (2015.022–2088.439)	1.061_x000D_ (1.041–1.077)	1097.21	1115.42	-645.838	0.0696466	0	0	0.942109	3.48717	13.2622	0.362492	1.37861	0.955828	160.624	0.833935	0.649 / 0.81 / 1.005	0.672228	81.5178	no	nbinomial
model_20m_clx_sqrt_PC9	1.384_x000D_ (1.138–1.625)	-	-	-	-	-	-	-	-	-	-	-	-	0.174_x000D_ (0.02–0.329)	-	1037.412_x000D_ (890.135–1190.431)	1.074_x000D_ (0.971–1.21)	1068.43	1059.49	-820.003	0.045288	0	0	0.990686	2.00493	8.09562	0.208412	0.841541	0.915539	183.974	1.09069	0.927 / 1.137 / 1.293	0.900062	36.9447	yes	nbinomial
model_20m_clx_sqrt_PC10	1.38_x000D_ (1.131–1.629)	-	-	-	-	-	-	-	-	-	-	-	-	-	-0.127_x000D_ (-0.301–0.047)	1026.082_x000D_ (860.13–1205.207)	1.085_x000D_ (0.96–1.215)	1072	1063.47	-850.057	0.0427181	0	0	0.993106	2.00263	7.45811	0.208174	0.775271	0.783795	167.327	1.12506	0.956 / 1.174 / 1.337	0.908292	36.0438	no	nbinomial

## Sheet: Table_S21_culex_30m
Model	Intercept	sqrt_humid	sqrt_precip	sqrt_temp	IBP_num	sqrt_PC1	sqrt_PC2	sqrt_PC3	sqrt_PC4	sqrt_PC5	sqrt_PC6	sqrt_PC7	sqrt_PC8	sqrt_PC9	sqrt_PC10	Range	Stdev	DIC	WAIC	LPML	CPO_median	cpo_failures	cpo_failure_rate	correlation	MAE	RMSE	MAE_rel	RMSE_rel	min_pred	max_pred	CV_mean	CV_q25_q50_q75	CV_high_prop	Time	non_zero_CrI	model_family
model_30m_clx_	1.378_x000D_ (1.121–1.631)	-	-	-	-	-	-	-	-	-	-	-	-	-	-	1084.136_x000D_ (920.294–1283.046)	1.097_x000D_ (0.977–1.233)	1072.4	1063.55	-828.323	0.0453317	0	0	0.99081	2.06889	8.02001	0.215061	0.83368	0.941836	182.673	1.11968	0.938 / 1.165 / 1.347	0.900513	33.3473	yes	nbinomial
model_30m_clx_sqrt_humid	1.382_x000D_ (1.127–1.632)	-0.096_x000D_ (-0.353–0.16)	-	-	-	-	-	-	-	-	-	-	-	-	-	1107.483_x000D_ (981.14–1240.345)	1.086_x000D_ (0.991–1.234)	1070.86	1064.11	-800.93	0.0471239	0	0	0.99021	2.11133	8.16425	0.219473	0.848674	0.766484	148.511	2.26854	2.008 / 2.327 / 2.584	1	35.1546	no	nbinomial
model_30m_clx_sqrt_precip	1.377_x000D_ (1.146–1.604)	-	-0.397_x000D_ (-0.639–-0.157)	-	-	-	-	-	-	-	-	-	-	-	-	913.014_x000D_ (718.473–1199.226)	1.039_x000D_ (0.913–1.192)	1061.55	1053.93	-1214.63	0.0255315	0	0	0.994687	1.84071	6.76517	0.191342	0.70324	42073.8	1.0037e+07	981.03	951.908 / 989.127 / 1004.802	1	33.0732	yes	nbinomial
model_30m_clx_sqrt_temp	1.366_x000D_ (1.147–1.579)	-	-	0.472_x000D_ (0.255–0.69)	-	-	-	-	-	-	-	-	-	-	-	805.103_x000D_ (661.695–955.09)	1.015_x000D_ (0.9–1.139)	1054.37	1044.97	-1230.39	0.0259575	0	0	0.996325	1.68358	5.89439	0.175008	0.612722	10.5786	1230.24	1.38158	1.265 / 1.438 / 1.542	0.987938	32.9763	yes	nbinomial
model_30m_clx_IBP_num	2.019_x000D_ (1.538–2.489)	-	-	-	0.312_x000D_ (0.101–0.52)	-	-	-	-	-	-	-	-	-	-	835.113_x000D_ (643.073–1025.7)	1.032_x000D_ (0.893–1.162)	1068.46	1059.37	-995.233	0.033246	0	0	0.99577	1.85161	6.51932	0.192475	0.677684	0.978399	199.827	1.08769	0.969 / 1.144 / 1.256	0.910321	37.7161	yes	nbinomial
model_30m_clx_sqrt_PC1	1.379_x000D_ (1.129–1.626)	-	-	-	-	0.199_x000D_ (0.04–0.361)	-	-	-	-	-	-	-	-	-	1041.033_x000D_ (860.445–1234.075)	1.081_x000D_ (0.965–1.213)	1067.95	1058.48	-862.444	0.043507	0	0	0.990857	2.03929	7.96261	0.211984	0.827715	1.11152	288.933	1.14481	0.976 / 1.192 / 1.351	0.918043	26.4882	yes	nbinomial
model_30m_clx_sqrt_PC2	1.372_x000D_ (1.108–1.635)	-	-	-	-	-	0.188_x000D_ (0.029–0.348)	-	-	-	-	-	-	-	-	1130.662_x000D_ (954.643–1316.712)	1.109_x000D_ (0.975–1.241)	1067.74	1059.11	-907.453	0.037251	0	0	0.99099	1.99308	7.59871	0.207181	0.789887	1.17553	462.722	1.28532	1.023 / 1.279 / 1.512	0.935629	48.7272	yes	nbinomial
model_30m_clx_sqrt_PC3	1.381_x000D_ (1.131–1.629)	-	-	-	-	-	-	0.108_x000D_ (-0.067–0.284)	-	-	-	-	-	-	-	1028.686_x000D_ (903.495–1171.237)	1.085_x000D_ (0.97–1.208)	1070.52	1061.83	-842.73	0.0448838	0	0	0.993122	1.97713	7.49376	0.205523	0.778977	1.05353	408.068	1.22811	1.049 / 1.264 / 1.413	0.948425	29.6724	no	nbinomial
model_30m_clx_sqrt_PC4	1.389_x000D_ (1.126–1.653)	-	-	-	-	-	-	-	0.038_x000D_ (-0.127–0.202)	-	-	-	-	-	-	1134.601_x000D_ (885.153–1479.421)	1.105_x000D_ (0.965–1.259)	1078.31	1069.3	-844.75	0.0460524	0	0	0.988225	2.18311	8.5903	0.226934	0.892962	0.963439	181.056	1.13307	0.943 / 1.173 / 1.368	0.903219	46.5317	no	nbinomial
model_30m_clx_sqrt_PC5	1.381_x000D_ (1.123–1.637)	-	-	-	-	-	-	-	-	-0.119_x000D_ (-0.289–0.051)	-	-	-	-	-	1076.477_x000D_ (943.108–1219.952)	1.102_x000D_ (0.991–1.215)	1070.59	1061.73	-836.949	0.0430121	0	0	0.992981	1.97857	7.49996	0.205673	0.779621	0.55184	141.041	1.19092	0.995 / 1.225 / 1.406	0.928527	31.2426	no	nbinomial
model_30m_clx_sqrt_PC6	1.489_x000D_ (0.705–2.272)	-	-	-	-	-	-	-	-	-	-0.189_x000D_ (-0.374–-0.003)	-	-	-	-	3241.796_x000D_ (3203.265–3280.79)	2.188_x000D_ (2.16–2.216)	1115.89	1104.71	-728.104	0.0712814	0	0	0.943426	3.23537	12.5417	0.336317	1.30371	0.178928	131.418	2.03965	1.046 / 1.48 / 2.367	0.936024	342.456	yes	nbinomial
model_30m_clx_sqrt_PC7	1.443_x000D_ (1.038–1.847)	-	-	-	-	-	-	-	-	-	-	-0.147_x000D_ (-0.289–-0.005)	-	-	-	2228.02_x000D_ (2192.894–2264.298)	1.303_x000D_ (1.268–1.339)	1077.66	1090.92	-693.032	0.056138	0	0	0.957006	2.86758	11.4388	0.298085	1.18906	0.380102	117.731	1.10598	0.83 / 1.041 / 1.335	0.875993	182.114	yes	nbinomial
model_30m_clx_sqrt_PC8	1.373_x000D_ (1.115–1.626)	-	-	-	-	-	-	-	-	-	-	-	0.06_x000D_ (-0.107–0.226)	-	-	1071.679_x000D_ (946.246–1203.415)	1.102_x000D_ (0.999–1.216)	1068.34	1060.2	-872.003	0.0404724	0	0	0.992388	1.97368	7.54188	0.205164	0.78398	1.01309	203.461	1.15699	0.973 / 1.202 / 1.375	0.915337	40.0723	no	nbinomial
model_30m_clx_sqrt_PC9	1.373_x000D_ (1.125–1.617)	-	-	-	-	-	-	-	-	-	-	-	-	0.12_x000D_ (-0.038–0.279)	-	995.159_x000D_ (814.891–1236.404)	1.079_x000D_ (0.945–1.218)	1068.84	1060.09	-954.23	0.0356885	0	0	0.992311	1.93194	7.54801	0.200825	0.784616	1.00981	205.355	1.13282	0.969 / 1.186 / 1.342	0.91049	38.8118	no	nbinomial
model_30m_clx_sqrt_PC10	1.381_x000D_ (1.136–1.626)	-	-	-	-	-	-	-	-	-	-	-	-	-	-0.177_x000D_ (-0.354–0)	989.559_x000D_ (852.849–1129.736)	1.073_x000D_ (0.965–1.191)	1069.89	1061.35	-846.198	0.0424621	0	0	0.994489	1.96862	7.05184	0.204638	0.733039	0.420848	131.547	1.16278	1.009 / 1.211 / 1.347	0.937038	31.1094	no	nbinomial

## Sheet: Table_S22_culex_50m
Model	Intercept	sqrt_humid	sqrt_precip	sqrt_temp	IBP_num	sqrt_PC1	sqrt_PC2	sqrt_PC3	sqrt_PC4	sqrt_PC5	sqrt_PC6	sqrt_PC7	sqrt_PC8	sqrt_PC9	sqrt_PC10	Range	Stdev	DIC	WAIC	LPML	CPO_median	cpo_failures	cpo_failure_rate	correlation	MAE	RMSE	MAE_rel	RMSE_rel	min_pred	max_pred	CV_mean	CV_q25_q50_q75	CV_high_prop	Time	non_zero_CrI	model_family
model_50m_clx_	1.377_x000D_ (1.118–1.634)	-	-	-	-	-	-	-	-	-	-	-	-	-	-	1071.062_x000D_ (910.596–1272.299)	1.1_x000D_ (0.97–1.227)	1069.6	1061.26	-898.843	0.0377997	0	0	0.991897	1.99081	7.65677	0.206944	0.795922	0.935762	185.687	1.13791	0.952 / 1.185 / 1.37	0.903669	34.9097	yes	nbinomial
model_50m_clx_sqrt_humid	1.373_x000D_ (1.112–1.631)	-0.095_x000D_ (-0.359–0.167)	-	-	-	-	-	-	-	-	-	-	-	-	-	1094.633_x000D_ (946.607–1267.464)	1.109_x000D_ (0.986–1.237)	1070.45	1061.73	-863.857	0.0424557	0	0	0.991388	2.01483	7.77177	0.209441	0.807877	0.781281	156.973	2.40408	2.118 / 2.466 / 2.75	1	44.2647	no	nbinomial
model_50m_clx_sqrt_precip	1.386_x000D_ (1.152–1.615)	-	-0.393_x000D_ (-0.638–-0.149)	-	-	-	-	-	-	-	-	-	-	-	-	938.706_x000D_ (768.374–1159.703)	1.033_x000D_ (0.905–1.178)	1069.63	1060.38	-909.706	0.0401724	0	0	0.992415	2.01957	7.64737	0.209935	0.794944	178784	4.11279e+07	1102.36	1070.347 / 1111.272 / 1127.587	1	32.5187	yes	nbinomial
model_50m_clx_sqrt_temp	1.376_x000D_ (1.147–1.593)	-	-	0.458_x000D_ (0.238–0.678)	-	-	-	-	-	-	-	-	-	-	-	828.755_x000D_ (672.816–988.509)	1.007_x000D_ (0.889–1.131)	1065.62	1055.62	-866.843	0.0413408	0	0	0.993908	1.94406	7.14706	0.202086	0.742937	10.1048	2775.34	1.38982	1.257 / 1.431 / 1.536	0.989121	37.2891	yes	nbinomial
model_50m_clx_IBP_num	2.036_x000D_ (1.56–2.501)	-	-	-	0.322_x000D_ (0.118–0.525)	-	-	-	-	-	-	-	-	-	-	798.168_x000D_ (639.795–977.984)	1.025_x000D_ (0.901–1.159)	1064.85	1056.68	-1063.28	0.0280609	0	0	0.996555	1.77491	6.12412	0.184502	0.636603	0.99339	203.209	1.07068	0.965 / 1.125 / 1.227	0.909419	47.9145	yes	nbinomial
model_50m_clx_sqrt_PC1	1.374_x000D_ (1.125–1.619)	-	-	-	-	0.183_x000D_ (0.025–0.344)	-	-	-	-	-	-	-	-	-	1001.103_x000D_ (829.57–1170.173)	1.085_x000D_ (0.963–1.212)	1067.88	1057.46	-885.258	0.0400296	0	0	0.991072	1.99672	7.89437	0.207559	0.82062	1.19651	265.128	1.15482	0.986 / 1.205 / 1.363	0.920861	37.308	yes	nbinomial
model_50m_clx_sqrt_PC2	1.415_x000D_ (1.152–1.677)	-	-	-	-	-	0.258_x000D_ (0.103–0.412)	-	-	-	-	-	-	-	-	1239.094_x000D_ (1183.406–1296.997)	1.058_x000D_ (1–1.12)	1073.8	1068.47	-695.049	0.0591012	0	0	0.98769	2.26851	8.42264	0.235812	0.875534	1.47162	3.64702e+08	1.45382	0.932 / 1.155 / 1.371	0.920241	61.4152	yes	nbinomial
model_50m_clx_sqrt_PC3	1.384_x000D_ (1.135–1.63)	-	-	-	-	-	-	0.08_x000D_ (-0.098–0.258)	-	-	-	-	-	-	-	1046.823_x000D_ (906.1–1214.559)	1.078_x000D_ (0.971–1.211)	1074.15	1065.71	-787.116	0.0472844	0	0	0.990766	2.10643	8.17064	0.218963	0.849339	1.08891	289.105	1.21108	1.042 / 1.25 / 1.393	0.950003	37.2029	no	nbinomial
model_50m_clx_sqrt_PC4	1.388_x000D_ (1.13–1.645)	-	-	-	-	-	-	-	-0.061_x000D_ (-0.233–0.111)	-	-	-	-	-	-	1087.522_x000D_ (889.684–1316.354)	1.107_x000D_ (0.977–1.257)	1071.77	1063.08	-970.97	0.0323027	0	0	0.992216	2.00663	7.59668	0.208589	0.789676	0.917409	177.808	1.12201	0.942 / 1.169 / 1.349	0.902204	43.7549	no	nbinomial
model_50m_clx_sqrt_PC5	1.376_x000D_ (1.119–1.629)	-	-	-	-	-	-	-	-	-0.235_x000D_ (-0.405–-0.065)	-	-	-	-	-	1142.963_x000D_ (998.566–1281.052)	1.084_x000D_ (0.984–1.202)	1067.67	1059.76	-794.722	0.0458334	0	0	0.992495	2.0229	7.6513	0.210281	0.795353	0.340145	93.438	1.14304	0.954 / 1.172 / 1.355	0.919396	41.0614	yes	nbinomial
model_50m_clx_sqrt_PC6	1.457_x000D_ (1.068–1.846)	-	-	-	-	-	-	-	-	-	-0.099_x000D_ (-0.248–0.05)	-	-	-	-	2180.762_x000D_ (2139.542–2222.116)	1.253_x000D_ (1.221–1.274)	1073.59	1090.53	-740.929	0.0484426	0	0	0.973004	2.72615	10.3786	0.283384	1.07886	0.447613	138.954	1.08867	0.776 / 1.004 / 1.348	0.823742	127.95	no	nbinomial
model_50m_clx_sqrt_PC7	1.387_x000D_ (1.126–1.649)	-	-	-	-	-	-	-	-	-	-	-0.148_x000D_ (-0.307–0.011)	-	-	-	1175.721_x000D_ (1074.64–1278.204)	1.094_x000D_ (1.015–1.18)	1073.25	1066.12	-740.348	0.0517874	0	0	0.986597	2.19908	8.7708	0.228595	0.911725	0.446435	100.92	1.22056	1.024 / 1.238 / 1.408	0.953667	46.0387	no	nbinomial
model_50m_clx_sqrt_PC8	1.379_x000D_ (1.115–1.644)	-	-	-	-	-	-	-	-	-	-	-	0.119_x000D_ (-0.053–0.291)	-	-	1165.122_x000D_ (945.833–1420.641)	1.086_x000D_ (0.938–1.232)	1057.27	1066.39	-865.295	0.04355	0	0	0.988859	2.15718	8.46988	0.224239	0.880445	1.09625	216.85	1.17834	0.979 / 1.217 / 1.412	0.918494	48.2915	no	nbinomial
model_50m_clx_sqrt_PC9	1.462_x000D_ (1.192–1.734)	-	-	-	-	-	-	-	-	-	-	-	-	0.057_x000D_ (-0.1–0.214)	-	1374.695_x000D_ (1194.447–1707.779)	1.055_x000D_ (0.974–1.124)	1116.95	1110.43	-716.573	0.0785969	0	0	0.949568	3.33832	13.3482	0.347019	1.38755	1.03772	149.203	1.03129	0.856 / 1.049 / 1.233	0.884787	55.5997	no	nbinomial
model_50m_clx_sqrt_PC10	1.367_x000D_ (1.125–1.605)	-	-	-	-	-	-	-	-	-	-	-	-	-	-0.263_x000D_ (-0.445–-0.082)	962.852_x000D_ (802.873–1151.56)	1.059_x000D_ (0.933–1.196)	1066.15	1057.13	-894.786	0.0406785	0	0	0.99506	1.92434	6.82229	0.200035	0.709178	0.295044	106.333	1.15722	1.015 / 1.207 / 1.331	0.940533	35.3451	yes	nbinomial

## Sheet: Table_S23_culex_100m
Model	Intercept	sqrt_humid	sqrt_precip	sqrt_temp	IBP_num	sqrt_PC1	sqrt_PC2	sqrt_PC3	sqrt_PC4	sqrt_PC5	sqrt_PC6	sqrt_PC7	sqrt_PC8	sqrt_PC9	sqrt_PC10	Range	Stdev	DIC	WAIC	LPML	CPO_median	cpo_failures	cpo_failure_rate	correlation	MAE	RMSE	MAE_rel	RMSE_rel	min_pred	max_pred	CV_mean	CV_q25_q50_q75	CV_high_prop	Time	non_zero_CrI	model_family
model_100m_clx_	1.388_x000D_ (1.132–1.641)	-	-	-	-	-	-	-	-	-	-	-	-	-	-	1105.817_x000D_ (951.174–1289.412)	1.087_x000D_ (0.976–1.216)	1077.42	1068.63	-752.633	0.0530733	0	0	0.988418	2.21419	8.68763	0.230165	0.90308	0.950591	177.189	1.09899	0.92 / 1.14 / 1.32	0.895271	33.6444	yes	nbinomial
model_100m_clx_sqrt_humid	1.377_x000D_ (1.104–1.651)	-0.087_x000D_ (-0.37–0.194)	-	-	-	-	-	-	-	-	-	-	-	-	-	1330.246_x000D_ (1141.648–1614.052)	1.149_x000D_ (1.02–1.292)	1069.27	1062.97	-842.852	0.0438681	0	0	0.989064	2.10272	8.18942	0.218577	0.851291	0.880257	182.427	2.59701	2.268 / 2.648 / 2.996	1	44.8387	no	nbinomial
model_100m_clx_sqrt_precip	1.374_x000D_ (1.13–1.616)	-	-0.383_x000D_ (-0.641–-0.125)	-	-	-	-	-	-	-	-	-	-	-	-	962.473_x000D_ (827.008–1085.917)	1.073_x000D_ (0.934–1.188)	1060.86	1051.6	-1098.39	0.0285018	0	0	0.994705	1.77366	6.52399	0.184372	0.67817	2.66122e+07	6.96888e+09	1235.45	1201.112 / 1244.402 / 1262.051	1	35.6543	yes	nbinomial
model_100m_clx_sqrt_temp	1.385_x000D_ (1.16–1.604)	-	-	0.456_x000D_ (0.235–0.679)	-	-	-	-	-	-	-	-	-	-	-	842.653_x000D_ (668.488–1026.48)	1.009_x000D_ (0.886–1.141)	1065.61	1056.17	-875.343	0.0399341	0	0	0.993791	1.94715	7.18747	0.202406	0.747138	9.85256	1102.38	1.38598	1.263 / 1.441 / 1.55	0.989854	33.0623	yes	nbinomial
model_100m_clx_IBP_num	2.029_x000D_ (1.556–2.493)	-	-	-	0.323_x000D_ (0.118–0.527)	-	-	-	-	-	-	-	-	-	-	809.738_x000D_ (658.96–981.602)	1.023_x000D_ (0.896–1.15)	1067.13	1058.45	-943.667	0.0352892	0	0	0.996001	1.8431	6.46856	0.19159	0.672407	0.986267	200.26	1.0717	0.963 / 1.126 / 1.229	0.909644	27.8823	yes	nbinomial
model_100m_clx_sqrt_PC1	1.387_x000D_ (1.137–1.635)	-	-	-	-	0.144_x000D_ (-0.02–0.309)	-	-	-	-	-	-	-	-	-	1022.1_x000D_ (864.301–1184.662)	1.079_x000D_ (0.964–1.207)	1071.07	1061.8	-822.436	0.0450963	0	0	0.990171	2.0767	8.21757	0.215873	0.854218	1.20518	260.114	1.14976	0.983 / 1.199 / 1.354	0.920636	41.014	no	nbinomial
model_100m_clx_sqrt_PC2	1.358_x000D_ (1.096–1.623)	-	-	-	-	-	0.309_x000D_ (0.144–0.474)	-	-	-	-	-	-	-	-	1339.018_x000D_ (1049.537–1970.234)	1.065_x000D_ (0.947–1.188)	1063.33	1056.61	-915.391	0.0361377	0	0	0.993358	1.94583	6.80449	0.202269	0.707327	1.97854	781.243	1.23561	1 / 1.235 / 1.46	0.935404	61.3351	yes	nbinomial
model_100m_clx_sqrt_PC3	1.381_x000D_ (1.133–1.626)	-	-	-	-	-	-	0.111_x000D_ (-0.08–0.301)	-	-	-	-	-	-	-	1019.645_x000D_ (869.766–1184.814)	1.086_x000D_ (0.974–1.215)	1069.38	1061.46	-900.445	0.0383461	0	0	0.993116	1.96742	7.44344	0.204514	0.773747	1.19278	324.326	1.24415	1.08 / 1.287 / 1.425	0.960036	41.2964	no	nbinomial
model_100m_clx_sqrt_PC4	1.375_x000D_ (1.113–1.635)	-	-	-	-	-	-	-	-0.023_x000D_ (-0.206–0.161)	-	-	-	-	-	-	1095.669_x000D_ (961.266–1239.642)	1.146_x000D_ (1.04–1.27)	1071.29	1062.6	-832.636	0.0448648	0	0	0.991228	2.01553	7.81306	0.209515	0.812169	0.906981	182.328	1.15212	0.959 / 1.197 / 1.391	0.907221	36.6899	no	nbinomial
model_100m_clx_sqrt_PC5	1.368_x000D_ (1.117–1.616)	-	-	-	-	-	-	-	-	-0.209_x000D_ (-0.384–-0.035)	-	-	-	-	-	1074.312_x000D_ (835.924–1386.906)	1.082_x000D_ (0.937–1.238)	1072.54	1062.28	-927.271	0.0411943	0	0	0.992119	2.03394	7.84516	0.211428	0.815505	0.418111	101.569	1.16035	0.989 / 1.202 / 1.357	0.929654	39.7234	yes	nbinomial
model_100m_clx_sqrt_PC6	1.378_x000D_ (1.109–1.646)	-	-	-	-	-	-	-	-	-	-0.006_x000D_ (-0.179–0.167)	-	-	-	-	1070.986_x000D_ (842.903–1274.574)	1.122_x000D_ (0.955–1.274)	1069.01	1060.26	-1092.07	0.0290197	0	0	0.992674	1.91722	7.3028	0.199295	0.759127	0.9243	191.871	1.34033	1.064 / 1.332 / 1.601	0.937715	31.8597	no	nbinomial
model_100m_clx_sqrt_PC7	1.358_x000D_ (1.108–1.605)	-	-	-	-	-	-	-	-	-	-	-0.184_x000D_ (-0.353–-0.016)	-	-	-	1019.704_x000D_ (868.349–1180.881)	1.086_x000D_ (0.978–1.218)	1065.08	1056.71	-934.994	0.034301	0	0	0.993751	1.89093	7.02471	0.196562	0.730219	0.415357	85.6281	1.24063	1.079 / 1.284 / 1.425	0.963869	54.882	yes	nbinomial
model_100m_clx_sqrt_PC8	1.446_x000D_ (1.035–1.858)	-	-	-	-	-	-	-	-	-	-	-	-0.004_x000D_ (-0.154–0.146)	-	-	2251.723_x000D_ (2220.999–2283.231)	1.314_x000D_ (1.292–1.332)	1078.62	1092.86	-706.25	0.0542716	0	0	0.966889	2.80946	10.931	0.292044	1.13628	0.835784	172.766	1.05118	0.753 / 0.976 / 1.283	0.804295	109.117	no	nbinomial
model_100m_clx_sqrt_PC9	1.377_x000D_ (1.128–1.624)	-	-	-	-	-	-	-	-	-	-	-	-	0.096_x000D_ (-0.076–0.269)	-	1015.301_x000D_ (828.184–1230.442)	1.088_x000D_ (0.966–1.237)	1071.05	1061.62	-910.231	0.0386007	0	0	0.990992	2.03123	7.98944	0.211146	0.830503	0.9879	212.836	1.12388	0.958 / 1.176 / 1.336	0.908066	44.5717	no	nbinomial
model_100m_clx_sqrt_PC10	1.359_x000D_ (1.097–1.593)	-	-	-	-	-	-	-	-	-	-	-	-	-	-0.415_x000D_ (-0.596–-0.235)	919.894_x000D_ (788.025–1064.398)	1.003_x000D_ (0.9–1.129)	1063.37	1054.06	-817.358	0.043527	0	0	0.994547	1.97126	7.0713	0.204913	0.735062	0.175742	5.75172e+07	1.10338	0.967 / 1.124 / 1.224	0.934107	44.285	yes	nbinomial
